# Supplementary material for: Ganorbifates A and B from Ganoderma orbiforme, determined by DFT calculations of NMR data and ECD spectra
Source: Royal Society of Chemistry journal article supplement (doi:10.1039/d0cc04679e), 2020-01-01
Supplement: d0cc04679e1.pdf [file d0cc04679e1.pdf]

## Ganorbifates A and B from *Ganoderma orbiforme*, Determined by DFT Calculations of NMR data and ECD spectra.

Xia Yin,  <sup>† a</sup> Thi M. L. Tuong, <sup>†b</sup> Jun-Mian Tian, <sup>a</sup> Gennaro Pescitelli,  <sup>\*,c</sup> and Jin-Ming Gao  <sup>\*,a</sup>

<sup>a</sup> Shaanxi Key Laboratory of Natural Products & Chemical Biology, College of Chemistry and Pharmacy, S Northwest A&F University, Yangling 712100, People's Republic of China.

<sup>b</sup> Faculty of Basic Science, Vietnam National University of Forestry Southern Campus, Trang Bom, DongNai, Vietnam.

<sup>c</sup> Dipartimento di Chimica e Chimica Industriale, Università di Pisa, Pisa, Italy

### Table of contents

#### Experimental section.

S1. Computed NMR data and discussion about configuration at C-4

S2. HRESIMS of ganorbifate A (1)

S3. <sup>1</sup>H NMR spectrum (500 MHz) of ganorbifate A (1) in CDCl<sub>3</sub>.

S4. <sup>13</sup>C NMR spectrum (125 MHz) of ganorbifate A (1) in CDCl<sub>3</sub>.

S5. HSQC spectrum (500 MHz) of ganorbifate A (1) in CDCl<sub>3</sub>.

S6. HMBC spectrum (500 MHz) of ganorbifate A (1) in CDCl<sub>3</sub>.

S7. <sup>1</sup>H-<sup>1</sup>H COSY spectrum (500 MHz) of ganorbifate A (1) in CDCl<sub>3</sub>.

S8. NOESY spectrum (500 MHz) of ganorbifate A (1) in CDCl<sub>3</sub>.

S9. HRESIMS of ganorbifate B (2)

S10. <sup>1</sup>H NMR spectrum (500 MHz) of ganorbifate B (2) in CDCl<sub>3</sub>.

S11. <sup>13</sup>C NMR spectrum (125 MHz) of ganorbifate B (2) in CDCl<sub>3</sub>.

S12. HSQC spectrum (500 MHz) of ganorbifate B (2) in CDCl<sub>3</sub>.

S13. HMBC spectrum (500 MHz) of ganorbifate B (2) in CDCl<sub>3</sub>.

S14. <sup>1</sup>H-<sup>1</sup>H COSY spectrum (500 MHz) of ganorbifate B (2) in CDCl<sub>3</sub>.

S15. NOESY spectrum (500 MHz) of ganorbifate B (2) in CDCl<sub>3</sub>.

S16. Structures and coordinates for trunc-1 used for ECD calculations

S17. Structures and coordinates for trunc-2 used for ECD calculations

S18. Coordinates of 1 used for NMR calculations

S19. Coordinates of 2 used for NMR calculations

S18. Coordinates of 4-*epi*-1 used for NMR calculations

S19. Coordinates of 4-*epi*-2 used for NMR calculations

## **Experimental section**

### **General experimental Procedures**

Optical rotations (OR) were measured on an Autopol III automatic polarimeter. UV spectra were measured on a Thermo Scientific Evolution-300UV-visible spectrophotometer. Nuclear Magnetic Resonance (NMR) spectra were measured on Agilent 400 MR and Bruker Avance III 500 spectrometers with tetramethylsilane (TMS) as internal standard at room temperature. High-resolution (HR) ESIMS were recorded on an AB Sciex Triple TOF 4600 system. ECD spectra were obtained on a Chirascan spectrometer. Silica gel (300–400 mesh, Qingdao Marine Chemical Ltd., People's Republic of China), Sephadex LH-20 (Amersham Biosciences, Sweden) and RP-18 gel (20–45  $\mu\text{m}$ , Fuji Silysia Chemical Ltd., Japan) were used for column chromatography (CC). Semipreparative HPLC was performed on a Waters 1525 liquid chromatography system equipped with Hypersil BDS C-18 column (4.6 mm  $\times$  250 mm, and 10.0 mm  $\times$  250 mm) and Chiralcel OD-H (4.6 mm  $\times$  150 mm). Fractions were monitored by TLC. Spots were visualized by heating silica gel plates immersed in vanillin/  $\text{H}_2\text{SO}_4$  in ethanol.

### **Fungal Material**

Fruiting bodies of *Ganoderma orbiforme* were collected from BenTre province, VietNam in 2017 provided by Professor Hoang Xuan Nien, Thu Dau Mot University in January 2018 and identified by Dr. Do Huu Thu on the basis of morphological characteristics. And then, *G. orbiforme* was further confirmed by the sequence data of the ITS rDNA (GenBank accession number: KX421867) by Isaka in the National Center for Genetic Engineering and Biotechnology, National Science and Technology for Development Agency, Thailand.

### **DNA extraction, PCR amplification and sequencing of the *ITS-rDNA* region**

Total genomic DNA was extracted using the plant/fungi DNA isolation Kit (Norgenbiotek, Canada). The nuclear gene (*ITS-rDNA*) was amplified through the following PCR cycling profile: an initial heating step at 95°C for 3 min; followed by incubating for 40 cycles of 95°C for 45s, 56°C for 45s min and 72°C for 45s, and completed by incubating at 72°C for 10 min. All PCR reactions were performed in 25  $\mu\text{L}$  volumes using Gene Amp PCR Systems 9700, including: 2  $\mu\text{L}$  of genomic DNA (10 ng total), 12.5  $\mu\text{L}$  Master Mix 2X, 1  $\mu\text{L}$  of each 10  $\mu\text{M}$  primer and 9.5  $\mu\text{L}$   $\text{H}_2\text{O}$  deionized. Two universal primers, forward primer (ITS1: 5'-TCC GTA GGT GAA CCT GCG G-3') and reverse primer (ITS-4: 5'-TCC TCC GCT TAT TGATAT GC- 3') were used for the amplification of the ITS regions of the fungus (White et al., 1990). Sequencing was performed in Macrogen Co. Ltd (Korea). Chromas Pro 2.1.6 software (Technelysium Pty Ltd., Tewantin, Australia) was used to edit the sequences. Aligned, combined sequences of ITS-rDNA yielded a total 555bp

positions is as follows:

GCTCATCCACTCTACACCTGTGCACTTATTGTGGGTTATAGATCGTGTGGAGCGAGCTCGT  
TCGTTTGACGAGTTTGTGAAGCGCGTCTGTGCCTGCGTTTTTATCACAACACTATAAAGTATT  
AGAATGTGTATTGCGATGTAACGCATCTATATAACAACCTTCAGCAACGGATCTCTTGGCTCTCG  
CATCGATGAAGAACGCAGCGAAATGCGATAAGTAATGTGAATTGCAGAATTCAGTGAATCATC  
GAATCTTTGAACGCACCTTGCCTCCTTGGTATTCCGAGGAGCATGCCTGTTTGTGAGTGCATGA  
AACCTTCAACCTACAATCTCTATGCGGTTTTTGTAGGCTTGGACTTGGAGGCTTGTTCGGTCTTTT  
ATTGATCGGCTCCTCTCAAATGTATTAGCTTGGTTCCCTTTCGAATCGGCTGTCGGTGTGATAAT  
GTCTACGCCGCGACCGTGACGCGTTTGGCGAGCTTCTAACCGTCCCGTTATTGGGACAACGCTT  
ATGACCTCTGACCTCAAATCAGGTAGGACTACCCGCTGAACTTAA

### Extraction and Isolation

*G. orbiforme* (3.3 kg) mushrooms were cut into small pieces and extracted with 95% EtOH under reflux three times. The combined ethanol extracts were filtered and concentrated under reduced pressure to give a dark brown residue of 223.0 g. The residue was suspended in H<sub>2</sub>O and extracted with ethyl acetate (EA). The combined EA extract (162.7 g) was fractionated by CC (silica gel, diethyl ether/ethyl acetate (Et:EA) step gradients), step gradient elution 100:0, 90:10, 80:20, 60:40, 50:50, 30:70, then 0:100 to obtain nine fractions, Fr-1–Fr-9. By repeated column chromatography, HPLC separation, from fraction VII-3-6 (0.458 g) was further separated by reversed-phase HPLC (MeOH-H<sub>2</sub>O, 80%) to afford seven fractions. Fraction VII-3-6-4 (0.289 g) was further separated by Chiralcel OD-H (4.6 mm × 150 mm) (n-hexan-EtOH, 98:2 %) to afford compounds **1** (3.8 mg) and **2** (3.3mg).

Compound **1**, white powder,  $[\alpha]_D^{25}$  36.53 (c 1.9, methanol); UV (methanol)  $\lambda_{\max}$  nm (log  $\epsilon$ ): 272 (1.95), HRESIMS ( $m/z$  551.2605  $[M + Na]^+$ , cald for C<sub>30</sub>H<sub>40</sub>O<sub>8</sub>Na, 551.2621)

Compound **2**, white powder,  $[\alpha]_D^{25}$  -6.86 (c 2.9, methanol); UV (methanol)  $\lambda_{\max}$  nm (log  $\epsilon$ ): 254 (1.42). HRESIMS ( $m/z$  537.2822  $[M + Na]^+$ , cald for C<sub>30</sub>H<sub>42</sub>O<sub>7</sub>Na, 537.2828)

### Computational Methods

Molecular mechanics, Hartree-Fock (HF) and density functional theory (DFT) calculations were run with Spartan'18 (Wavefunction, Inc., Irvine CA, 2018), with standard parameters and convergence criteria. DFT and time-dependent (TD) DFT calculations were run with Gaussian16 with default grids and convergence criteria.<sup>1</sup> Extended conformational searches were run on full molecules **1** and **2** and on their epimers 12-*epi*-**1** and 11-*epi*-**2**. NMR calculations were run on full molecules **1** and **2**. ECD calculations were run on truncated models of **1** and **2** (trunc-**1** and trunc-**2**, see Chart). The truncation preserves the polycyclic core

while all substituents attached by flexible bonds are replaced by methyl groups.

Extended conformational searches were run with the Monte Carlo algorithm using Merck molecular force field (MMFF). All conformers thus obtained were analyzed for selected H-H distances, irrespective of their relative energy but with a maximum of 500 conformers for each compound. Selected H-H distances were measured on all conformers and analyzed through a cluster analysis visualized by histograms (see main text). For methyl groups, the distances were measured from the carbon atom.

For NMR calculations, the conformers obtained by a conformational search run with the Monte Carlo algorithm using Merck molecular force field (MMFF) were geometry-optimized at HF/3-21G level, screened by single-point calculations at  $\omega$ B97X-D/6-31G(d) level, and geometry-optimized at the same level. Final energies and populations were estimated at the  $\omega$ B97X-V/6-311+G(2df,2p) level, according to the procedure described by Hehre et al.<sup>2</sup> The procedure afforded 13 energy minima for **1**, and 30 for **2**, within the final energy threshold (10 kJ/mol at  $\omega$ B97X-D/6-31G(d) level). <sup>13</sup>C-NMR chemical shifts were then calculated with the GIAO method at  $\omega$ B97X-D/6-31G(d) level. Finally, an empirical correction was applied depending on the number of bonds to the carbon and on the bond lengths.<sup>2</sup> Calculated <sup>13</sup>C chemical shifts are reported in Table S1. The same procedure was applied to 4-*epi*-**1** and 4-*epi*-**2** (Table S2).

For ECD calculations, the same conformational search and geometry optimization procedure described above was applied to trunc-**1** and trunc-**2** models. This procedure resulted in 2 energy minima for trunc-**1**, and 1 for trunc-**2**, within the final energy threshold (10 kJ/mol at  $\omega$ B97X-D/6-31G(d) level). The structures and coordinates are reported in the end of this Supporting Information. They were used as input structures for TDDFT calculations run at the B3LYP/def2-TZVP and CAM-B3LYP/def2-TZVP level, including 36 excited states (roots) in each case. For compound **2**, the inclusion of IEF-PCM solvent model for methanol was checked for consistency. Average ECD spectra were computed by weighting component CD spectra with Boltzmann factors at 300 K estimated from DFT internal energies. CD spectra were generated using the program SpecDis,<sup>3</sup> using dipole-length rotational strengths; the difference with dipole-velocity values was negligible in all cases. The plotting parameters for Figure 5 in the main text are the following: compound **1**, CAM-B3LYP/def2-TZVP, exponential bandwidth 0.35 eV, no wavelength shift, scaling factor 5; compound **2**, B3LYP/def2-TZVP, exponential bandwidth 0.3 eV, wavelength shift -10 nm, scaling factor 3.

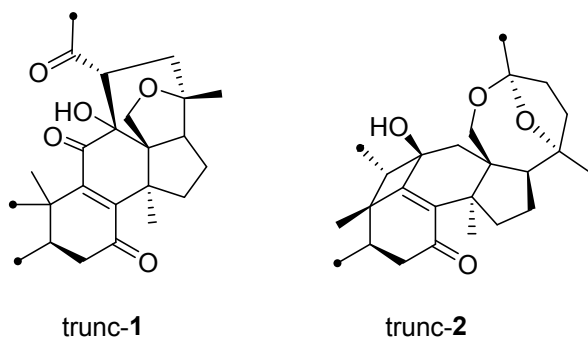

**Chart:** truncated models of **1** and **2** used in ECD calculations. C-C bonds were cut at the atoms indicated by dots, and replaced (capped) by C-H bonds.

### References

- 1) Frisch, M. J.; Trucks G.W.; Schlegel H. B.; et al. Gaussian 16, Revision A.03. Wallingford CT: Gaussian, Inc.; 2016.
- 2) Hehre, W.; Klunzinger, P.; Deppmeier, B.; Driessen, A.; Uchida, N.; Hashimoto, M.; Fukushi, E.; Takata, Y.; *J. Nat. Prod.* **2019**, *82*, 2299–2306
- 3) Bruhn, T.; Schaumlöffel, A.; Hemberger, Y.; Pescitelli, G. SpecDis Version 1.70; 2017. Berlin, Germany <https://specdis-software.jimdo.com/>.

**S1. Computed NMR data**

| Carbon | Compound 1, $^{13}\text{C}$ $\delta$ (ppm) |       |                | Compound 2, $^{13}\text{C}$ $\delta$ (ppm) |       |                |
|--------|--------------------------------------------|-------|----------------|--------------------------------------------|-------|----------------|
|        | Exp.                                       | Calc. | Diff. $\Delta$ | Exp.                                       | Calc. | Diff. $\Delta$ |
| 1      | 32.9                                       | 31.7  | -1.2           | 54.3                                       | 53.7  | -0.6           |
| 2      | 29.4                                       | 31.0  | 1.6            | 31.3                                       | 34.0  | 2.7            |
| 3      | 173.4                                      | 176.5 | 3.1            | 171.6                                      | 173.2 | 1.6            |
| 4      | 57.5                                       | 55.8  | -1.7           | 56.3                                       | 56.6  | 0.3            |
| 5      | 47.5                                       | 46.4  | -1.1           | 42.5                                       | 43.0  | 0.5            |
| 6      | 37.3                                       | 38.1  | 0.8            | 36.9                                       | 37.9  | 1.0            |
| 7      | 198.5                                      | 203.3 | 4.8            | 198.7                                      | 199.8 | 1.1            |
| 8      | 154.7                                      | 157.6 | 2.9            | 133.0                                      | 133.7 | 0.7            |
| 9      | 148.5                                      | 147.9 | -0.6           | 162.0                                      | 166.9 | 4.9            |
| 10     | 40.0                                       | 42.0  | 2.0            | 52.6                                       | 52.3  | -0.3           |
| 11     | 203.3                                      | 209.4 | 6.1            | 81.7                                       | 80.8  | -0.9           |
| 12     | 79.8                                       | 82.0  | 2.2            | 34.4                                       | 35.3  | 0.9            |
| 13     | 63.2                                       | 63.4  | 0.2            | 52.8                                       | 54.3  | 1.5            |
| 14     | 45.7                                       | 47.0  | 1.3            | 47.1                                       | 48.3  | 1.2            |
| 15     | 37.0                                       | 36.9  | -0.1           | 30.5                                       | 31.4  | 0.9            |
| 16     | 21.3                                       | 22.6  | 1.3            | 25.6                                       | 27.2  | 1.6            |
| 17     | 44.6                                       | 45.2  | 0.6            | 51.7                                       | 53.0  | 1.3            |
| 18     | 75.2                                       | 75.3  | 0.1            | 64.8                                       | 66.5  | 1.7            |
| 19     | 21.3                                       | 20.9  | -0.4           | 17.9                                       | 17.9  | 0.0            |
| 20     | 84.5                                       | 84.5  | 0.0            | 87.4                                       | 88.9  | 1.5            |
| 21     | 21.5                                       | 22.1  | 0.6            | 32.7                                       | 32.6  | -0.1           |
| 22     | 42.0                                       | 42.0  | 0.0            | 34.6                                       | 36.2  | 1.6            |
| 23     | 46.0                                       | 46.0  | 0.0            | 33.8                                       | 36.1  | 2.3            |
| 24     | 218.4                                      | 222.3 | 3.9            | 111.3                                      | 112.2 | 0.9            |
| 25     | 37.4                                       | 37.4  | 0.0            | 31.0                                       | 33.1  | 2.1            |
| 26     | 7.5                                        | 8.4   | 0.9            | 8.6                                        | 9.5   | 0.9            |
| 28     | 57.4                                       | 53.2  | -4.2           | 47.8                                       | 48.3  | 0.5            |
| 29     | 21.2                                       | 21.7  | 0.5            | 22.2                                       | 23.1  | 0.9            |
| 30     | 31.2                                       | 32.8  | 1.6            | 26.9                                       | 27.4  | 0.5            |
| 31     | 51.9                                       | 52.7  | 0.8            | 51.6                                       | 53.0  | 1.4            |
| rmsd   |                                            |       | 2.1            |                                            |       | 1.5            |

Table S1.  $^{13}\text{C}$  chemical shifts computed for compounds **1** and **2** by the procedure explained in the Computational Section. The root-mean-square deviation (rmsd) is given by the formula  $[(\sum\Delta^2)/n]^{0.5}$  where  $\Delta$  is the difference between calculated and experimental chemical shift,  $n$  the number of data employed, and  $\sum$  indicates the summation of  $\Delta^2$  values over  $n$  data.

| Carbon | Compound 4- <i>epi</i> -1, <sup>13</sup> C δ(ppm) |              |         | Compound 4- <i>epi</i> -2, <sup>13</sup> C δ(ppm) |              |         |
|--------|---------------------------------------------------|--------------|---------|---------------------------------------------------|--------------|---------|
|        | Exp.                                              | Calc.        | Diff. Δ | Exp.                                              | Calc.        | Diff. Δ |
| 1      | 32.9                                              | 36.00        | 3.10    | 54.3                                              | 53.80        | -0.50   |
| 2      | 29.4                                              | 30.50        | 1.10    | 31.3                                              | 33.80        | 2.50    |
| 3      | 173.4                                             | 175.60       | 2.20    | 171.6                                             | 137.20       | -34.40  |
| 4      | 57.5                                              | <b>53.30</b> | -4.20   | 56.3                                              | <b>55.80</b> | -0.50   |
| 5      | 47.5                                              | <b>50.40</b> | 2.90    | 42.5                                              | <b>45.10</b> | 2.60    |
| 6      | 37.3                                              | 38.70        | 1.40    | 36.9                                              | 38.20        | 1.30    |
| 7      | 198.5                                             | 201.10       | 2.60    | 198.7                                             | 199.30       | 0.60    |
| 8      | 154.7                                             | 158.10       | 3.40    | 133.0                                             | 133.60       | 0.60    |
| 9      | 148.5                                             | 145.20       | -3.30   | 162.0                                             | 166.50       | 4.50    |
| 10     | 40.0                                              | 40.40        | 0.40    | 52.6                                              | 52.90        | 0.30    |
| 11     | 203.3                                             | 210.50       | 7.20    | 81.7                                              | 81.10        | -0.60   |
| 12     | 79.8                                              | 81.40        | 1.60    | 34.4                                              | 35.20        | 0.80    |
| 13     | 63.2                                              | 63.00        | -0.20   | 52.8                                              | 54.20        | 1.40    |
| 14     | 45.7                                              | 46.60        | 0.90    | 47.1                                              | 48.30        | 1.20    |
| 15     | 37.0                                              | 38.10        | 1.10    | 30.5                                              | 31.40        | 0.90    |
| 16     | 21.3                                              | 22.90        | 1.60    | 25.6                                              | 27.20        | 1.60    |
| 17     | 44.6                                              | 44.60        | 0.00    | 51.7                                              | 53.00        | 1.30    |
| 18     | 75.2                                              | 77.00        | 1.80    | 64.8                                              | 66.50        | 1.70    |
| 19     | 21.3                                              | <b>24.10</b> | 2.80    | 17.9                                              | <b>19.40</b> | 1.50    |
| 20     | 84.5                                              | 84.60        | 0.10    | 87.4                                              | 88.80        | 1.40    |
| 21     | 21.5                                              | 22.10        | 0.60    | 32.7                                              | 32.60        | -0.10   |
| 22     | 42.0                                              | 42.20        | 0.20    | 34.6                                              | 36.10        | 1.50    |
| 23     | 46.0                                              | 46.50        | 0.50    | 33.8                                              | 36.10        | 2.30    |
| 24     | 218.4                                             | 221.50       | 3.10    | 111.3                                             | 112.20       | 0.90    |
| 25     | 37.4                                              | 37.80        | 0.40    | 31.0                                              | 33.10        | 2.10    |
| 26     | 7.5                                               | 8.40         | 0.90    | 8.6                                               | 9.60         | 1.00    |
| 28     | 57.4                                              | <b>53.30</b> | -4.10   | 47.8                                              | <b>54.50</b> | 6.70    |
| 29     | 21.2                                              | <b>22.60</b> | 1.40    | 22.2                                              | <b>21.50</b> | -0.70   |
| 30     | 31.2                                              | 30.30        | -0.90   | 26.9                                              | 27.40        | 0.50    |
| 31     | 51.9                                              | 57.90        | 6.00    | 51.6                                              | 52.70        | 1.10    |
| rmsd   |                                                   |              | 2.7     |                                                   |              | 6.6     |

Table S2. <sup>13</sup>C chemical shifts computed for compounds 4-*epi*-1 and 4-*epi*-2. For details see caption to Table S1. The values in bold are expected to be sensitive to the configuration at C-4.

## Discussion about the relative configuration at C-4

To assign the relative configuration at C-4 of compounds **1** and **2**, molecular modelling and NMR calculations data for compounds **1** (with 4*S* configuration), 4-*epi*-**1** (4*R*), **2** (4*S* configuration), and 4-*epi*-**2** (4*R*) were considered.

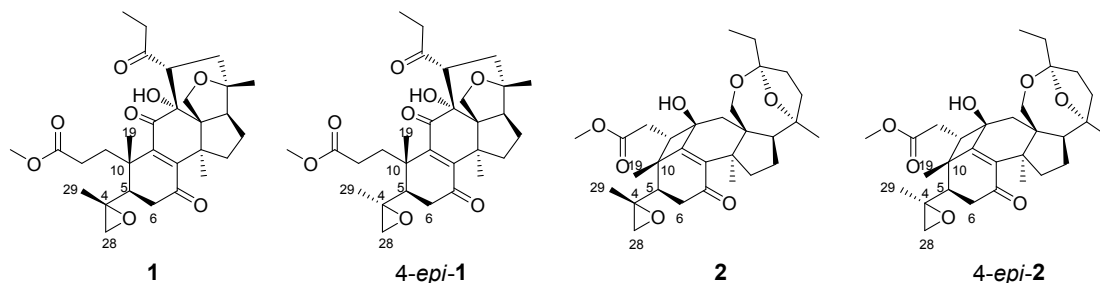

Tables S1 and S2 show the comparison between experimental and calculated  $^{13}\text{C}$  chemical shifts, using the procedure outlined in the Computational Section. The overall rms deviation is 2.1 ppm for **1** and 2.7 ppm for 4-*epi*-**1**. If we restrict the analysis to the signals more affected by configuration at C-4, namely those of C-4, C-5, C-19, C-28 and C-29, the rms deviation is similarly 2.1 ppm for **1** and 2.7 ppm for 4-*epi*-**1**. The situation is even more clear-cut for compound **2**. The overall rms deviation is 1.5 ppm for **2** and 6.6 ppm for 4-*epi*-**2**; for the restricted analysis, the rms deviation is 0.53 ppm for **2** and 3.3 ppm for 4-*epi*-**2**.

Further evidence in favor of the established assignment for **1** comes from analysis of NOE data helped by molecular modeling results. Although there is apparent free rotation around the C-4/C-5 bond, DFT-optimized geometries show a large preference for structures with the C-4/C-29 bond bisecting the C-6/C-5/C-10 angle, i.e. anti to the C-5H bond. Such preferential arrangement is found for an overall population of 72% at 300K, estimated using  $\omega\text{B97X-V/6-311+G(2df,2p)}$  energies. It is in good agreement with the observed strong NOE correlation between Me-29 and Me-19, and between H-28 and H-1. The structure for the lowest-energy minimum (44% population) is shown below. Compound 4-*epi*-**1** showed even a stronger preference for a similar arrangement around the C-4/C-5 bond, with an overall population of 82% at 300K. In this case, however, H-28 would point far away from H-1 and make the observation of a NOE effect unfeasible (see lowest-energy minimum below, 40% population).

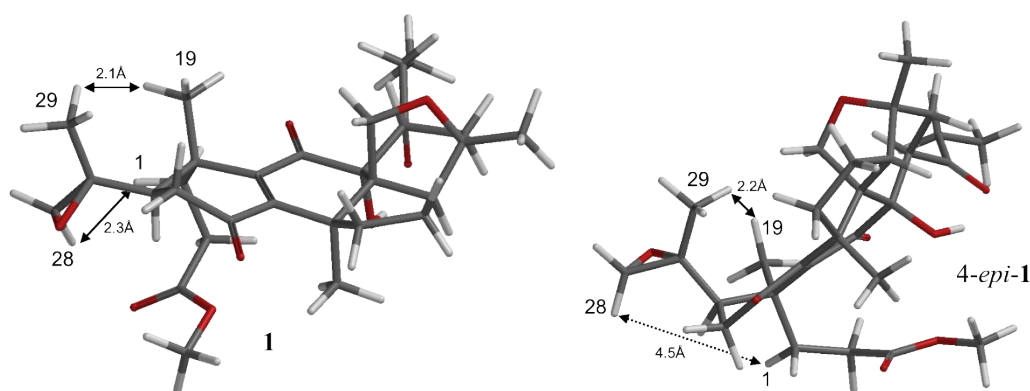



## S2. HRESIMS of ganorbifate A (1)

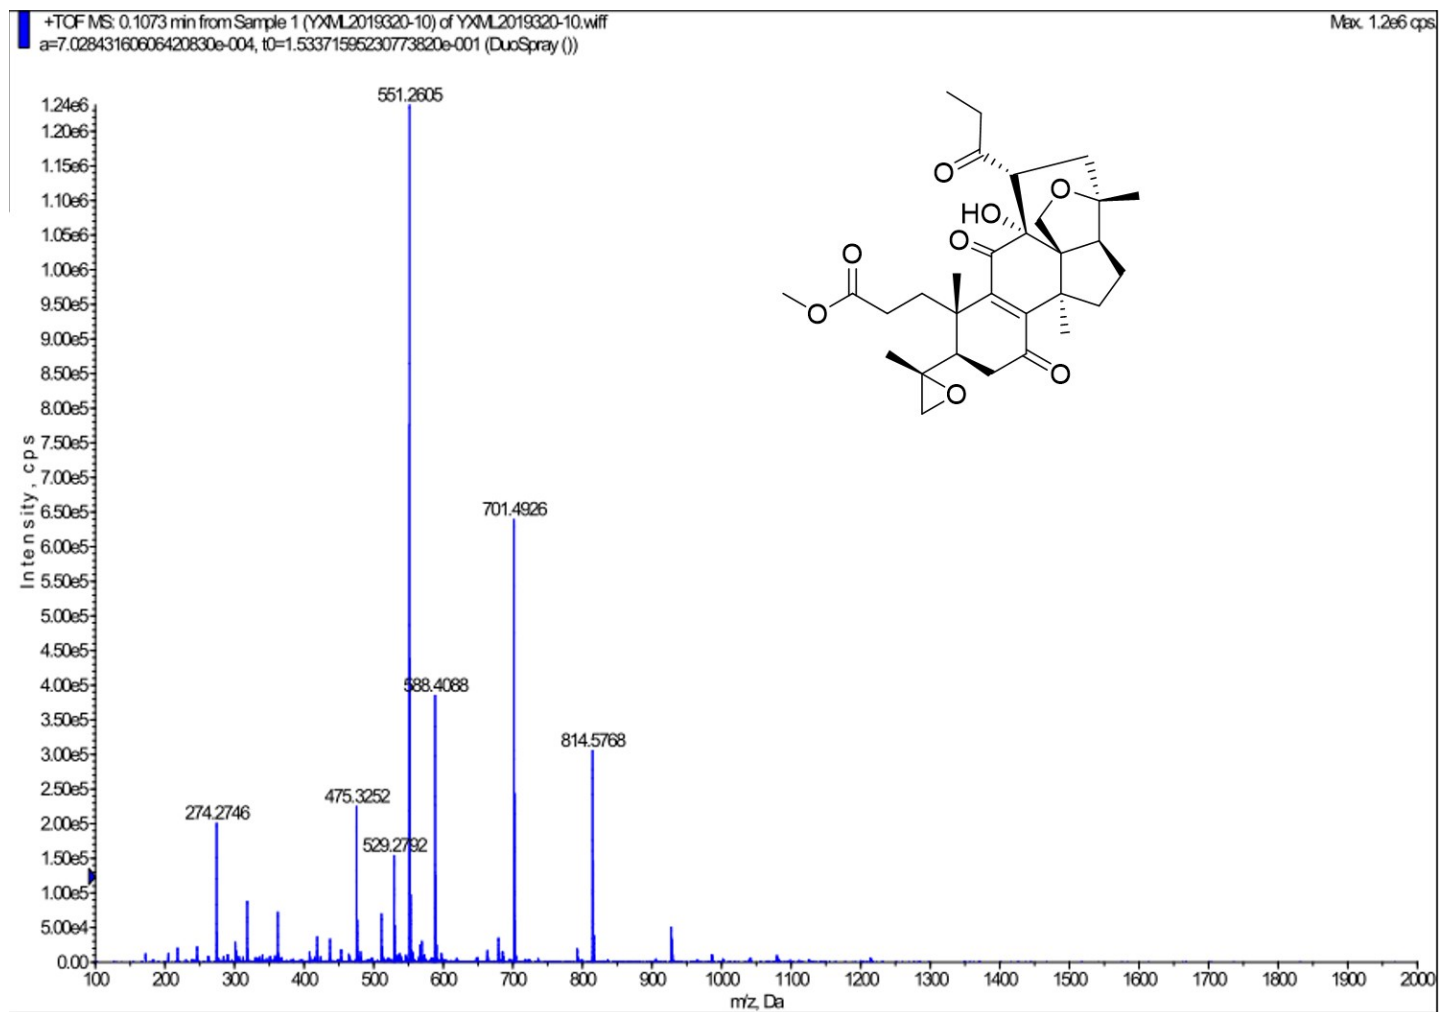

S3. <sup>1</sup>H NMR spectrum (500 MHz) of ganorbifate A (1) in CDCl<sub>3</sub>.

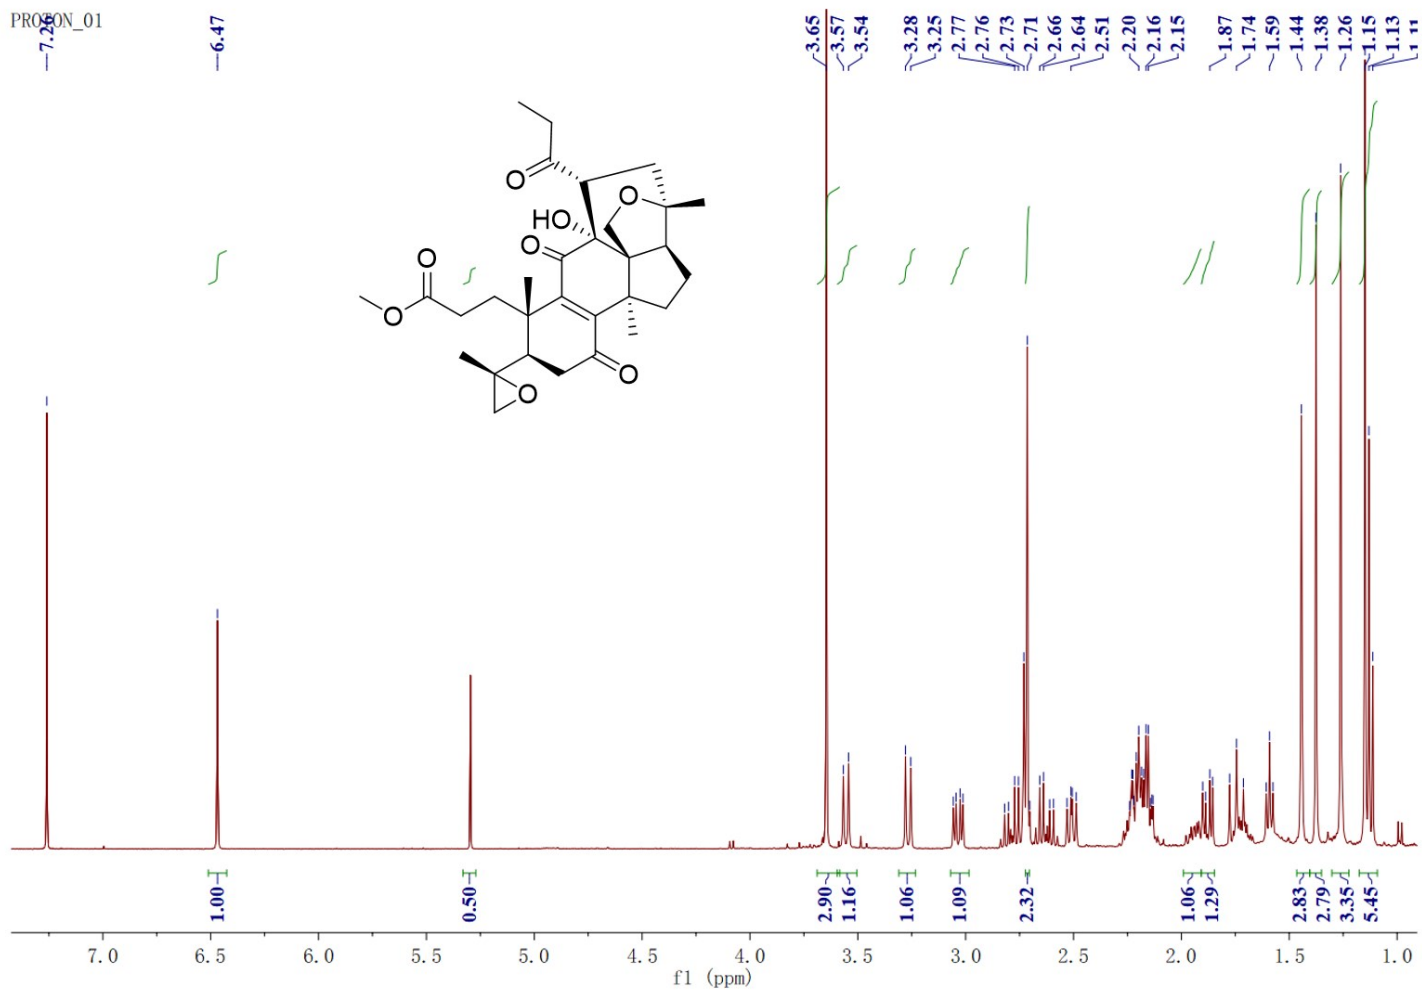

S4. <sup>13</sup>C NMR spectrum (125 MHz) of ganorbifate A (1) in CDCl<sub>3</sub>.

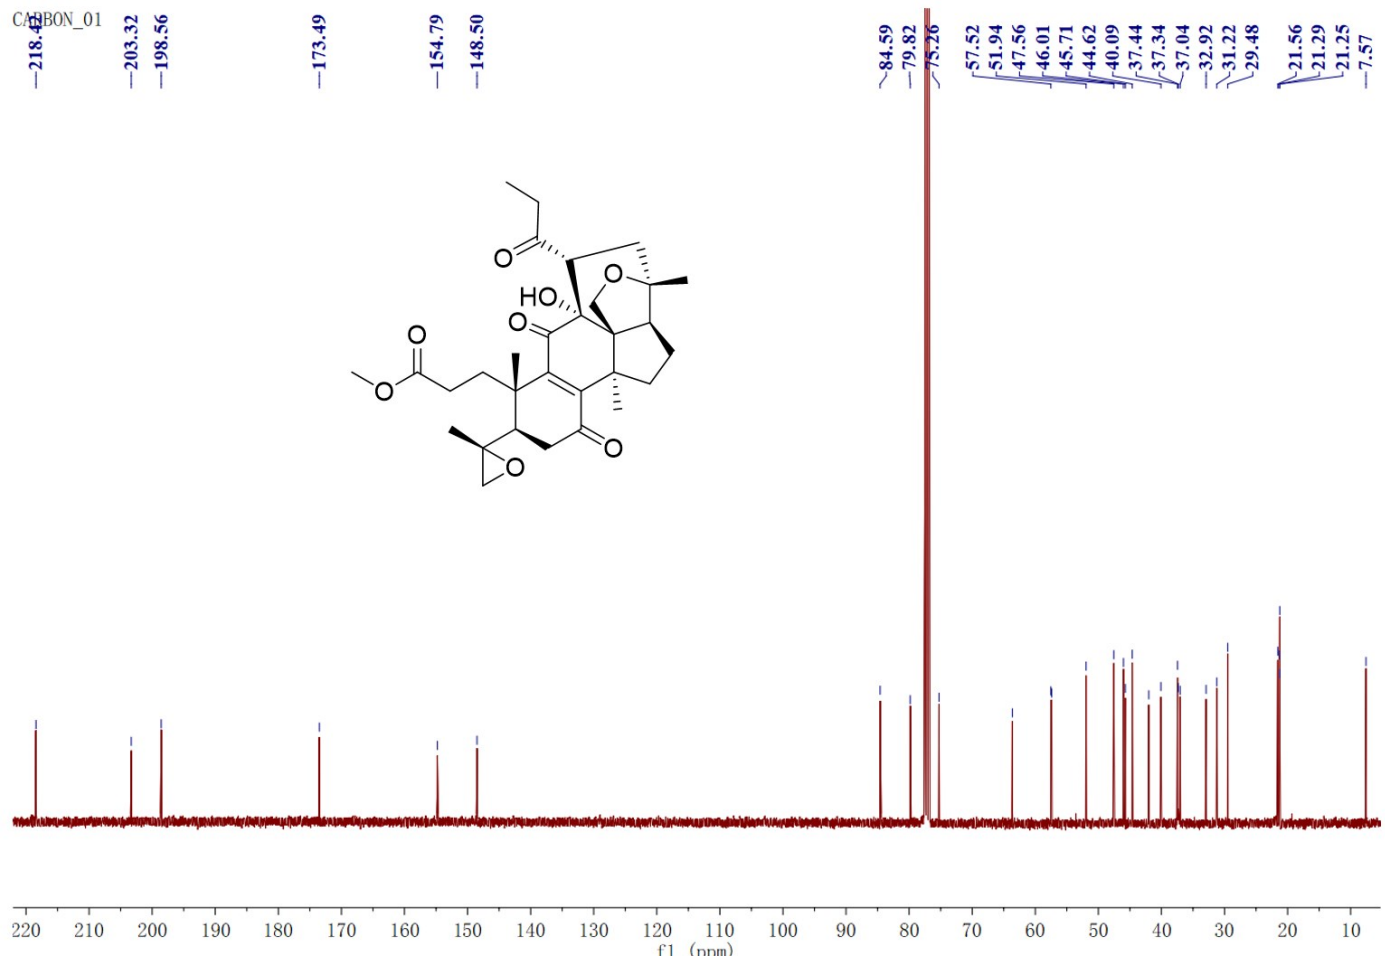

S5. HSQC spectrum (500 MHz) of ganorbifate A (1) in CDCl<sub>3</sub>.

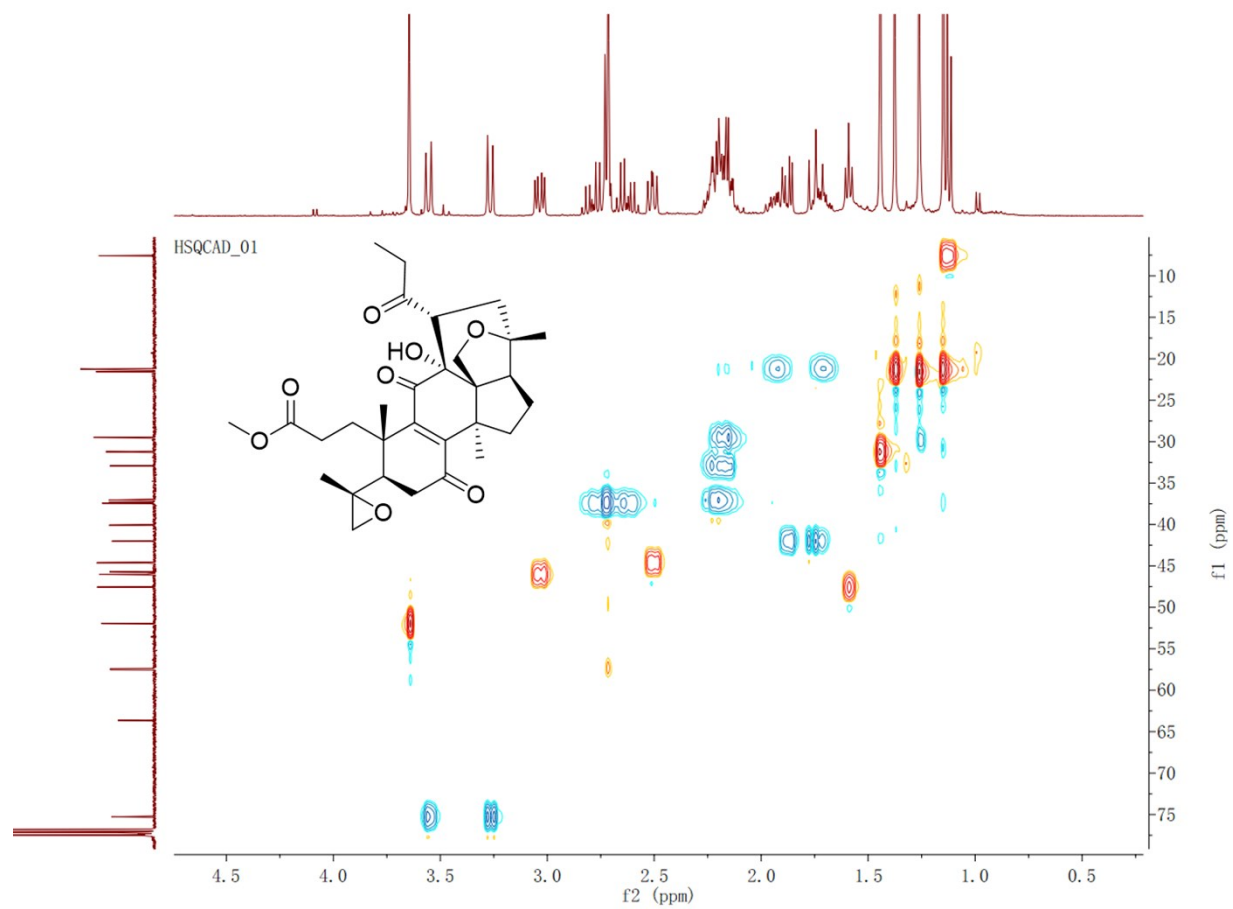

S6. HMBC spectrum (500 MHz) of ganorbifate A (1) in CDCl<sub>3</sub>.

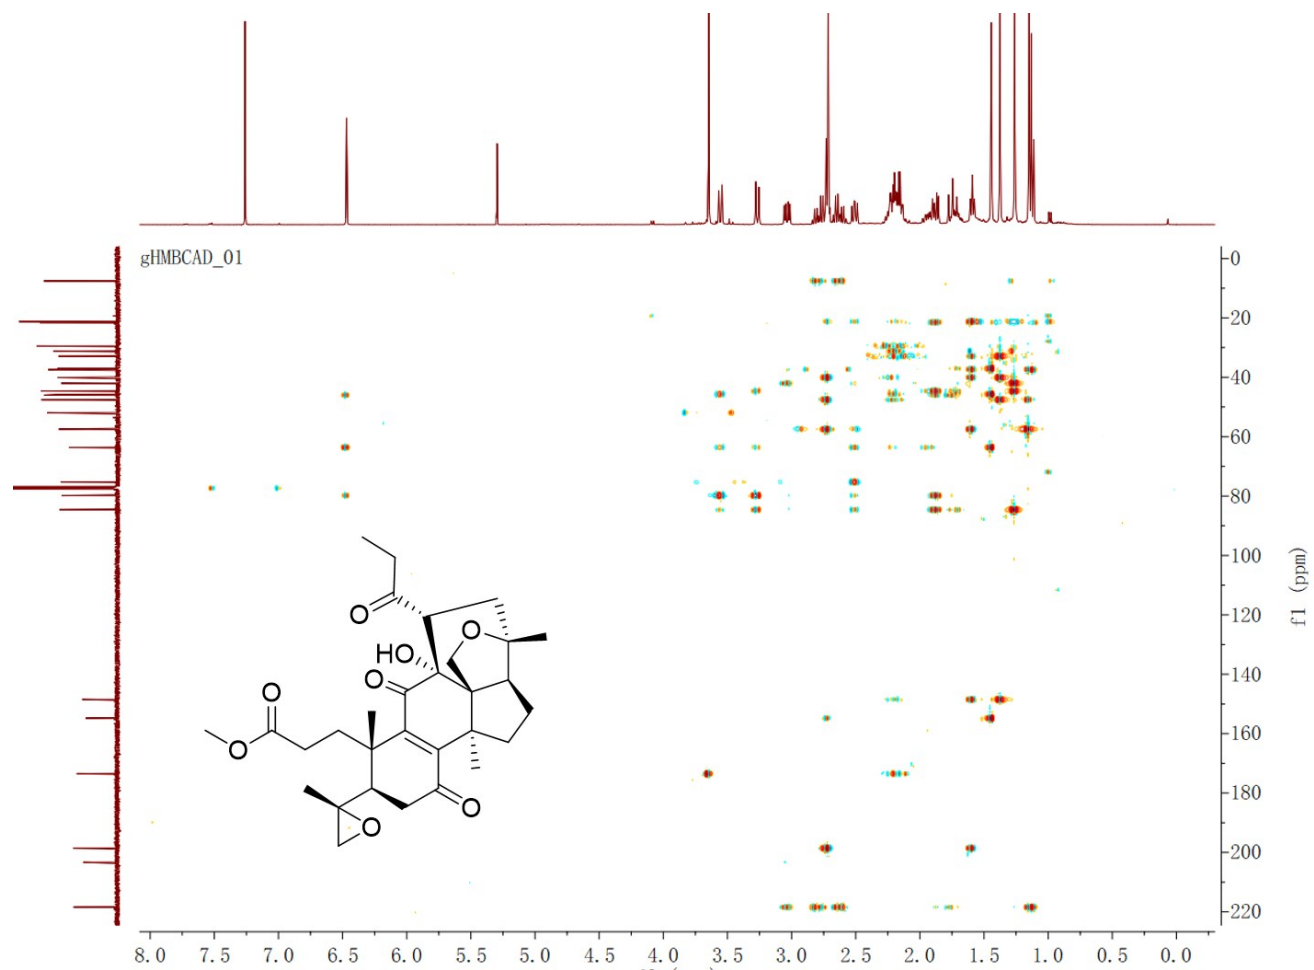

S7.  $^1\text{H}$ - $^1\text{H}$  COSY spectrum (500 MHz) of ganorbifate A (1) in  $\text{CDCl}_3$ .

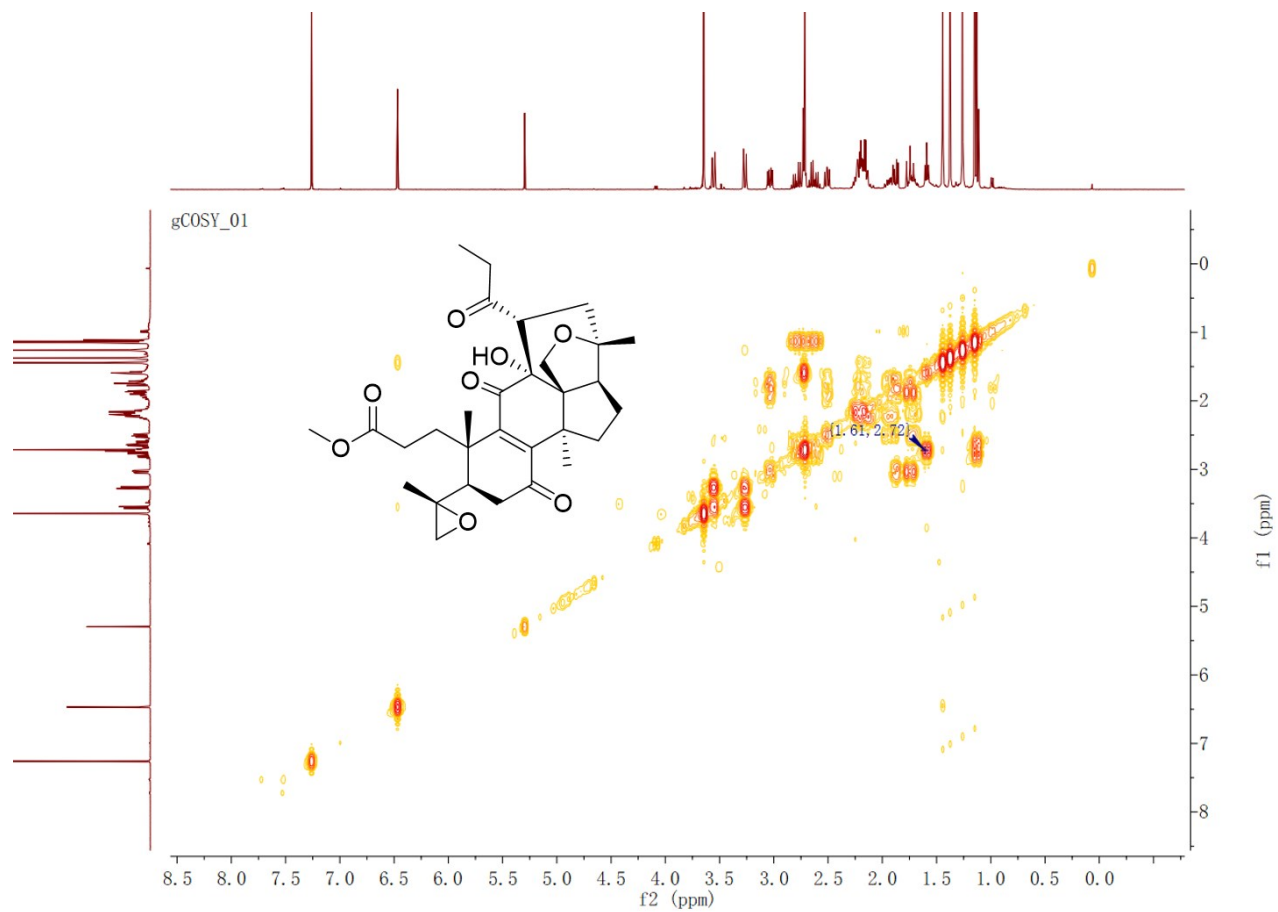

S8. NOESY spectrum (500 MHz) of ganorbifate A (1) in CDCl<sub>3</sub>

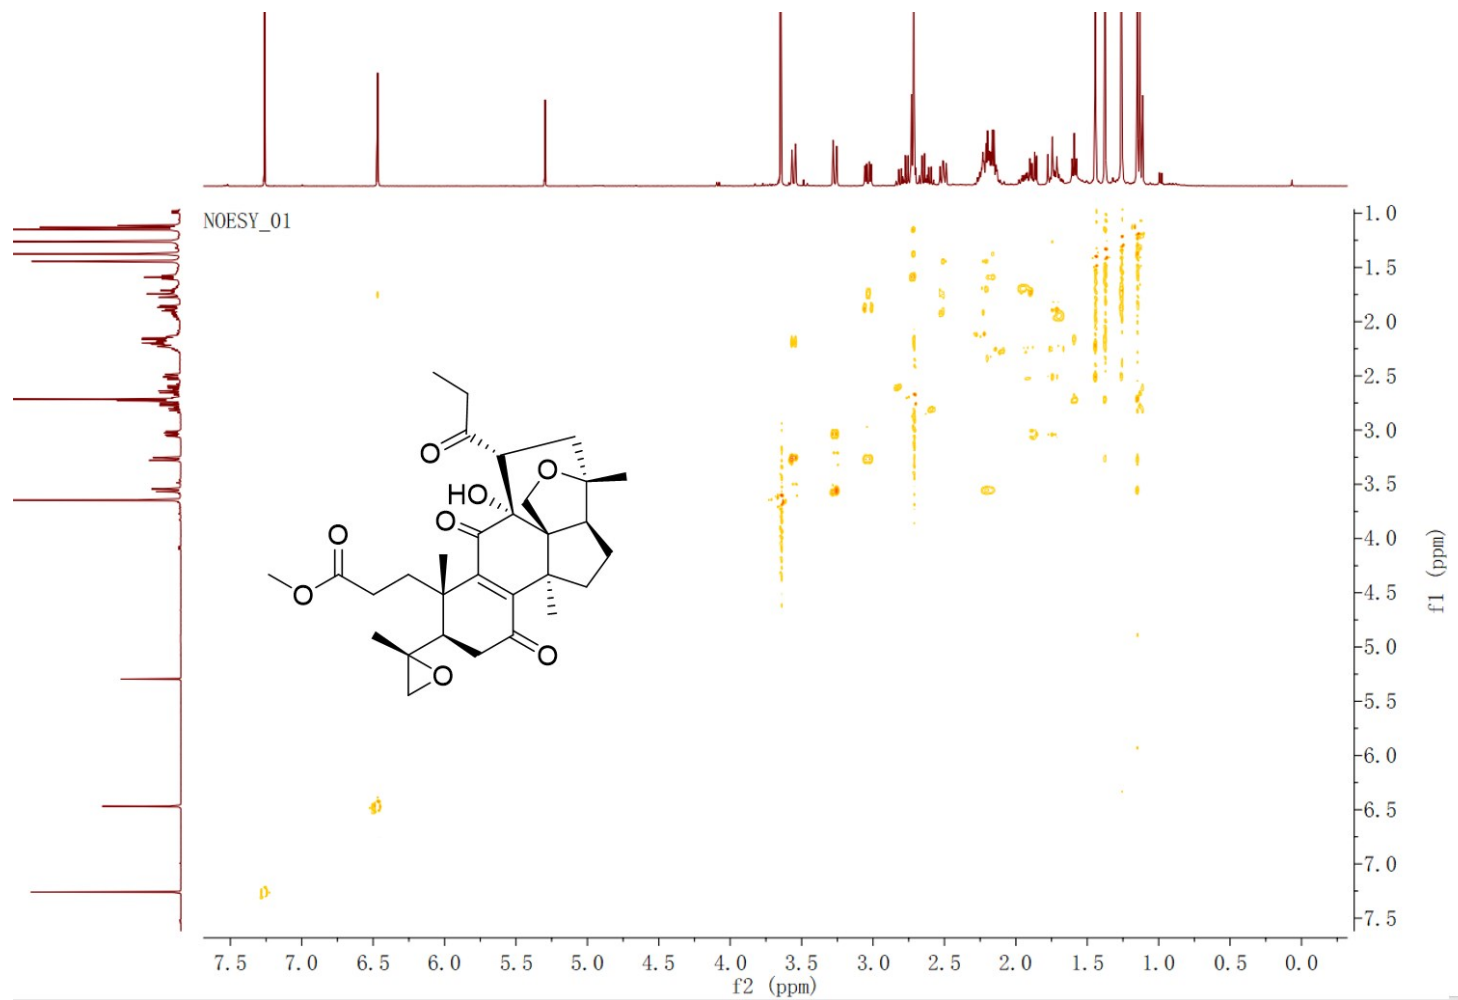

### S9. HRESIMS of ganorbifate B (2)

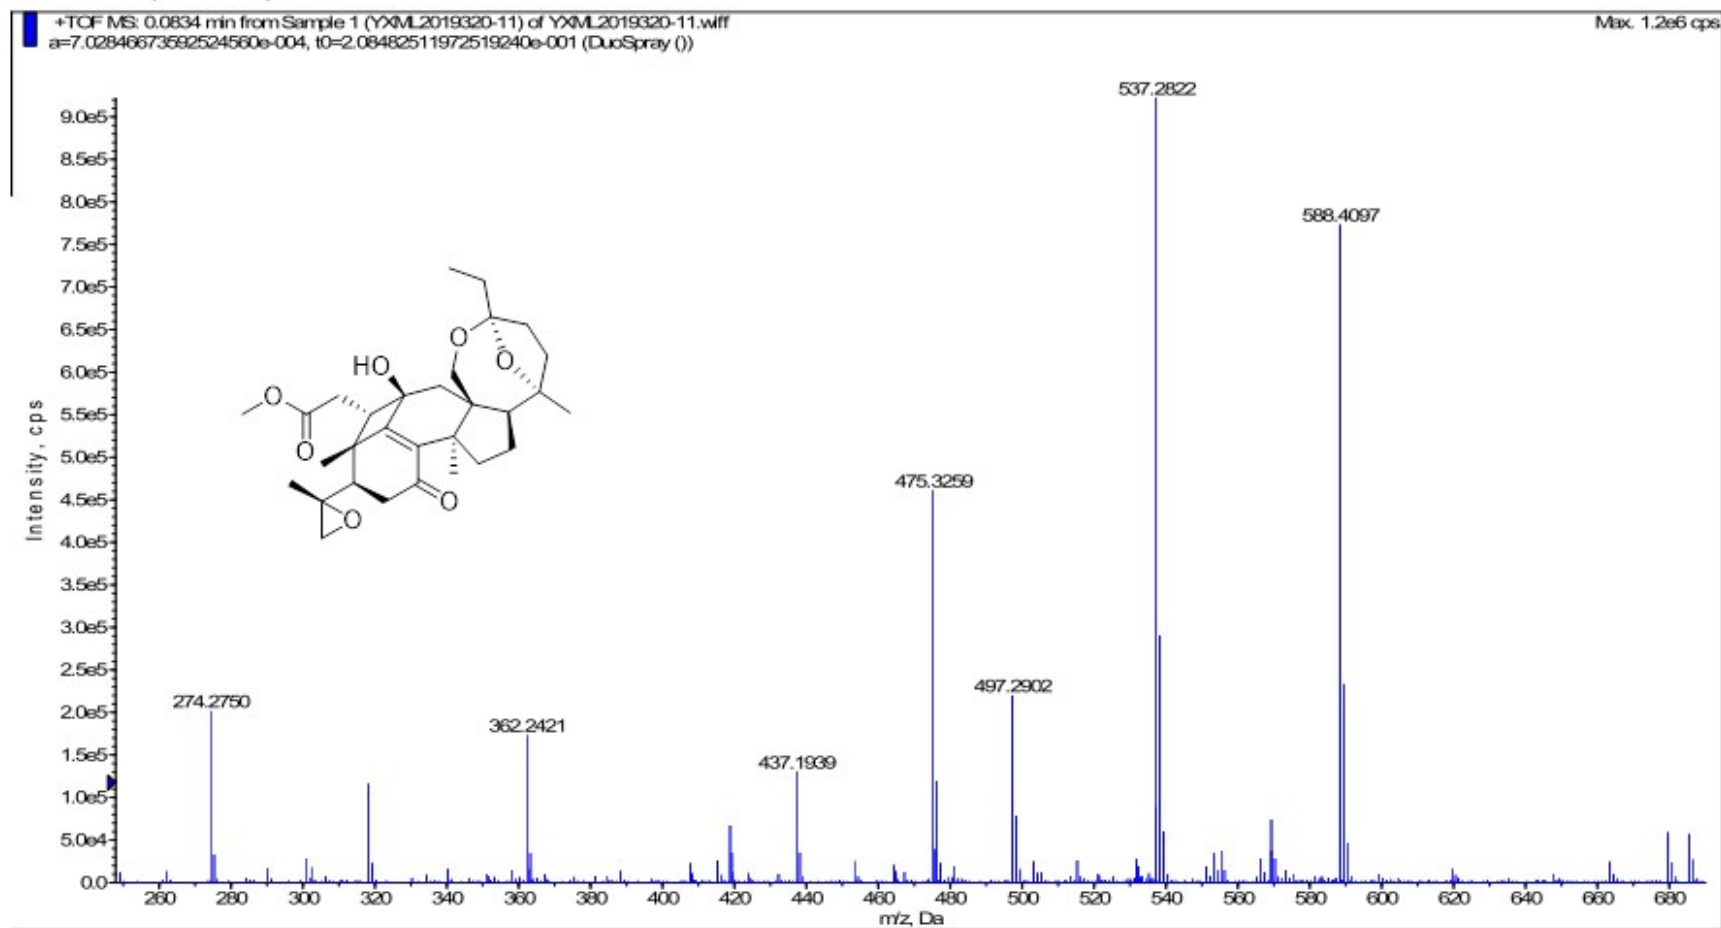



S10. <sup>1</sup>H NMR spectrum (500 MHz) of ganorbifate B (2) in CDCl<sub>3</sub>

GJM-20190126-LC-NL H-9 BJ (500hz)/20  
PROTON DMSO-D6 (D:\2019-1) ZHL 45

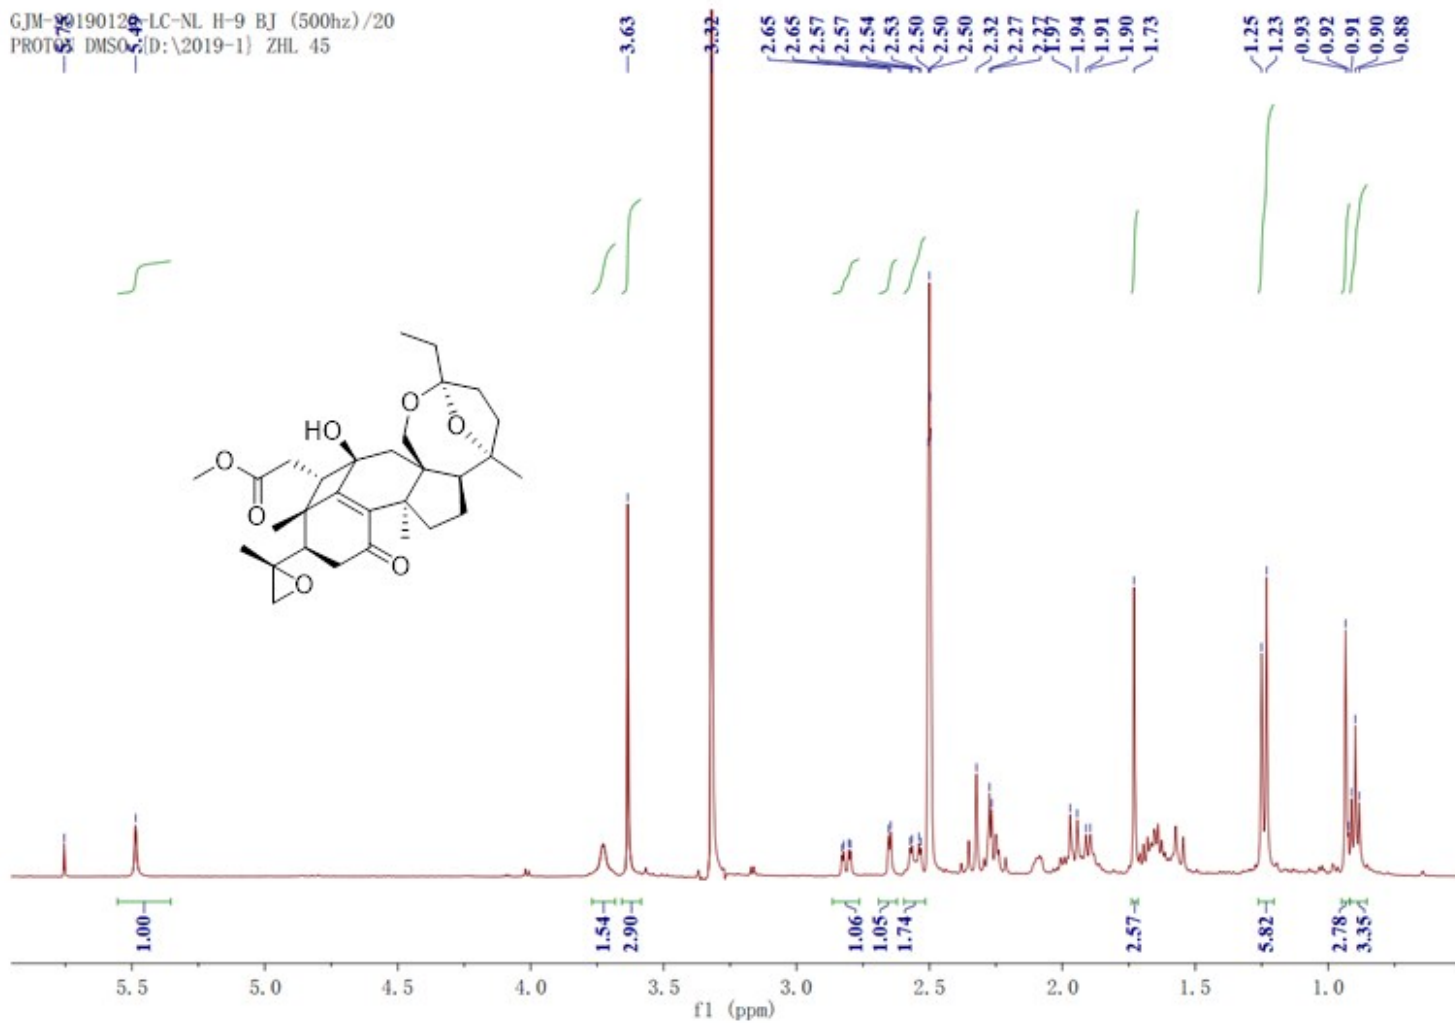

S11. <sup>13</sup>C NMR spectrum (125 MHz) of ganorbifate B (2) in CDCl<sub>3</sub>

G:\H-20190120-LC-NL 189 BJ.2.fid  
CPD DMSO (D:\2019\1) ZH

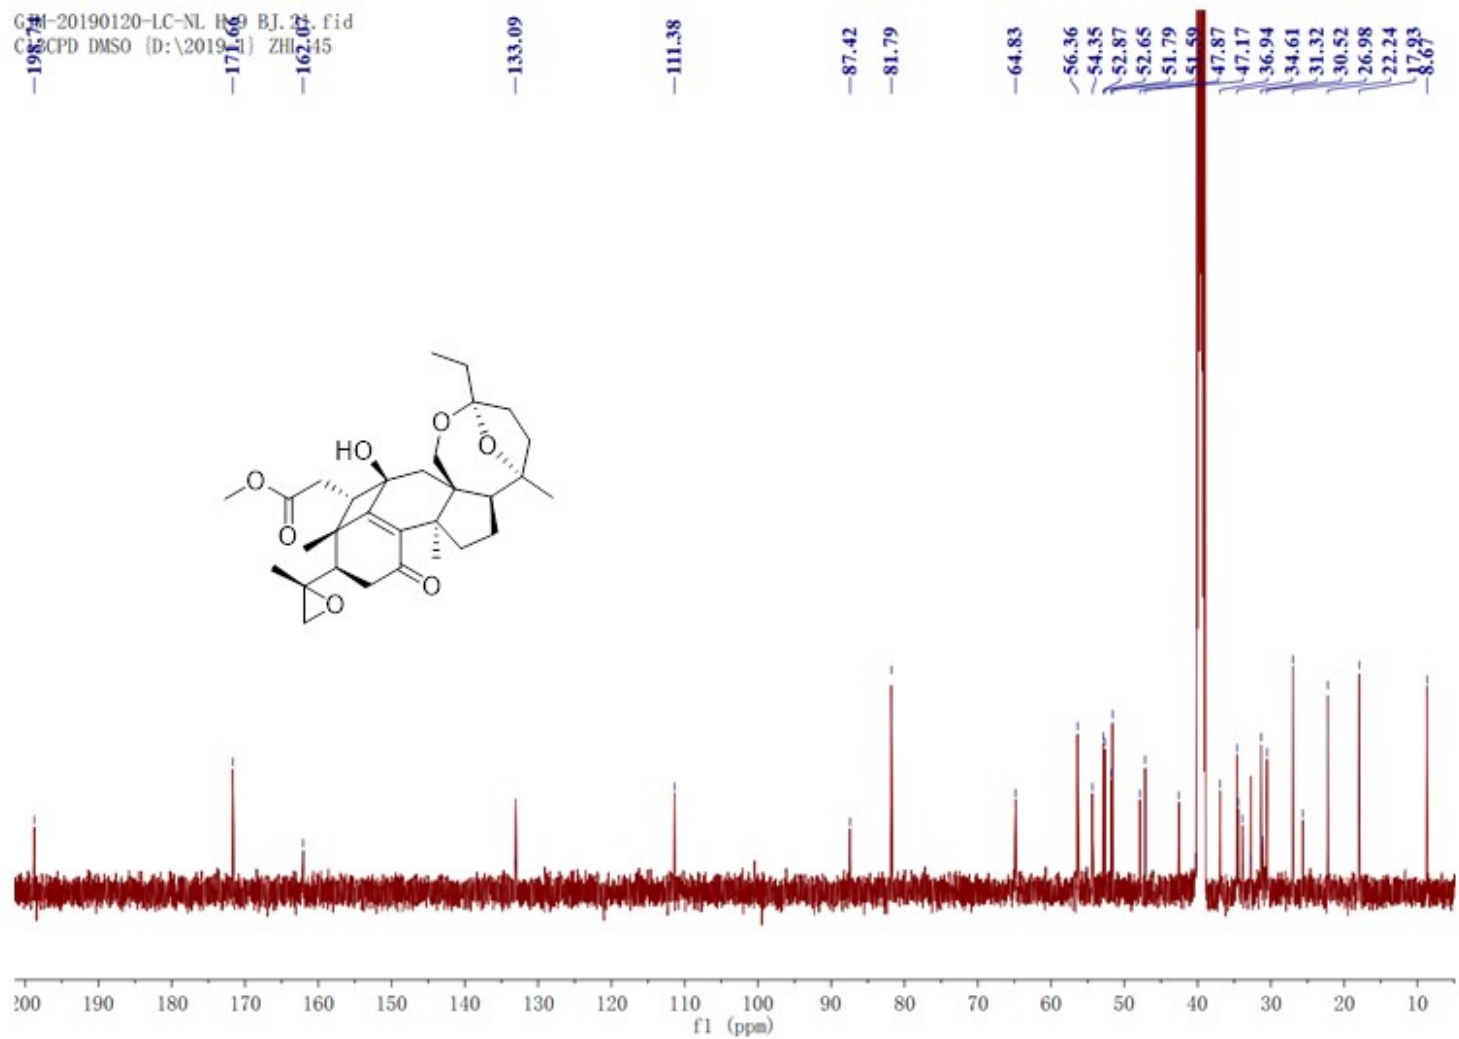

S12. HSQC spectrum (500 MHz) of ganorbifate B (2) in CDCl<sub>3</sub>.

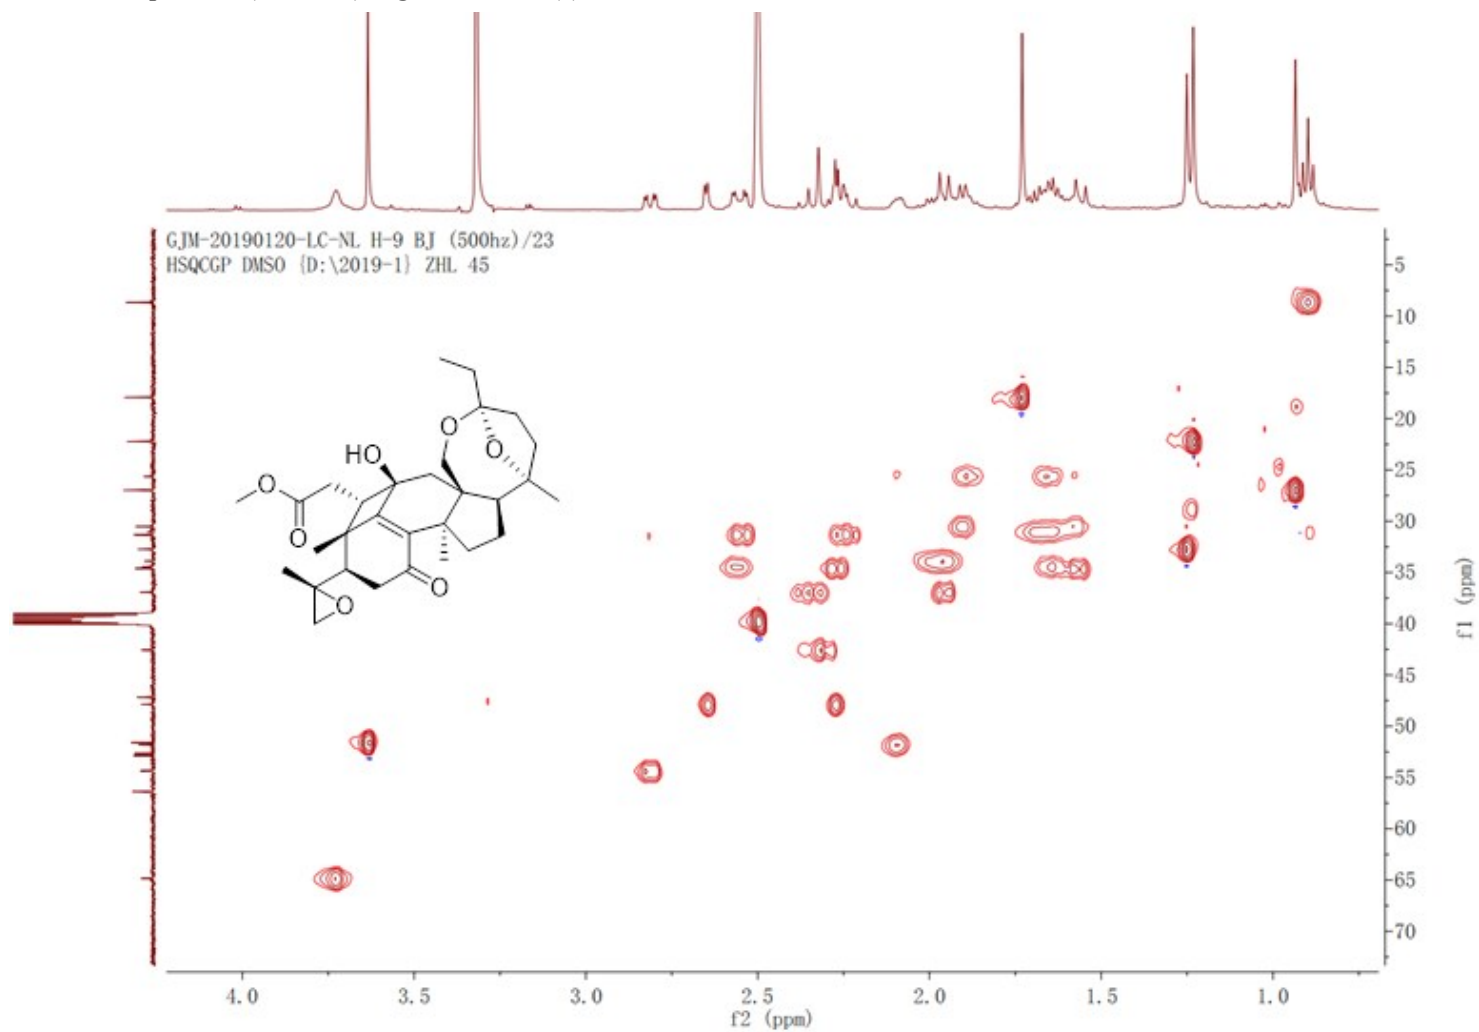

S13. HMBC spectrum (500 MHz) of ganorbifate B (2) in CDCl<sub>3</sub>.

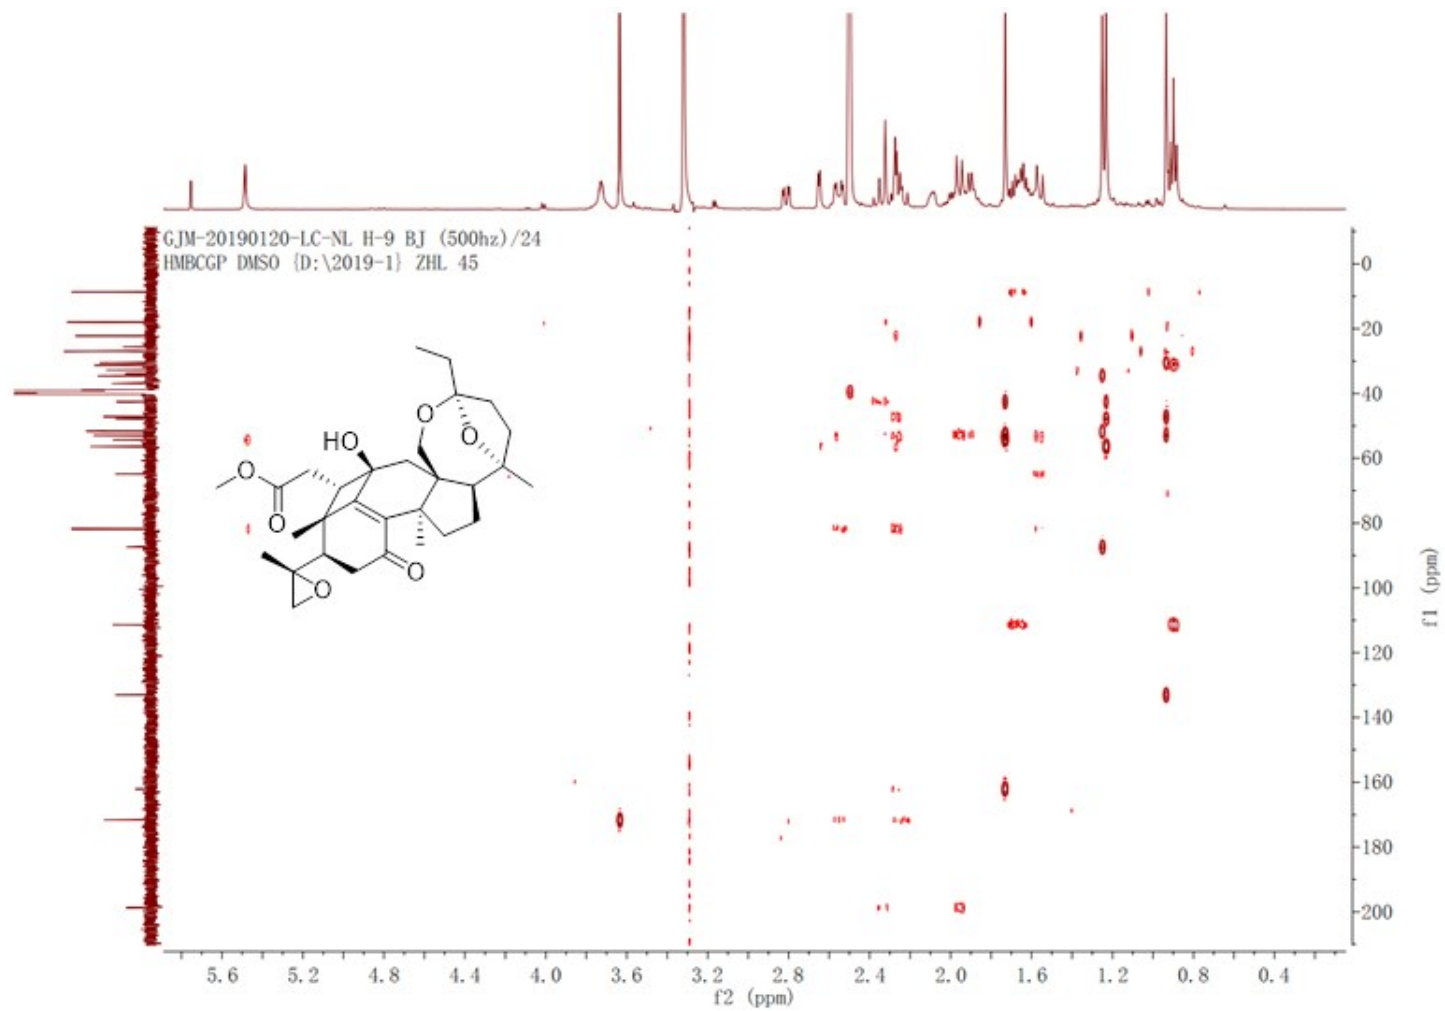

S14.  $^1\text{H}$ - $^1\text{H}$  COSY spectrum (500 MHz) of ganorbifate B (2) in  $\text{CDCl}_3$ .

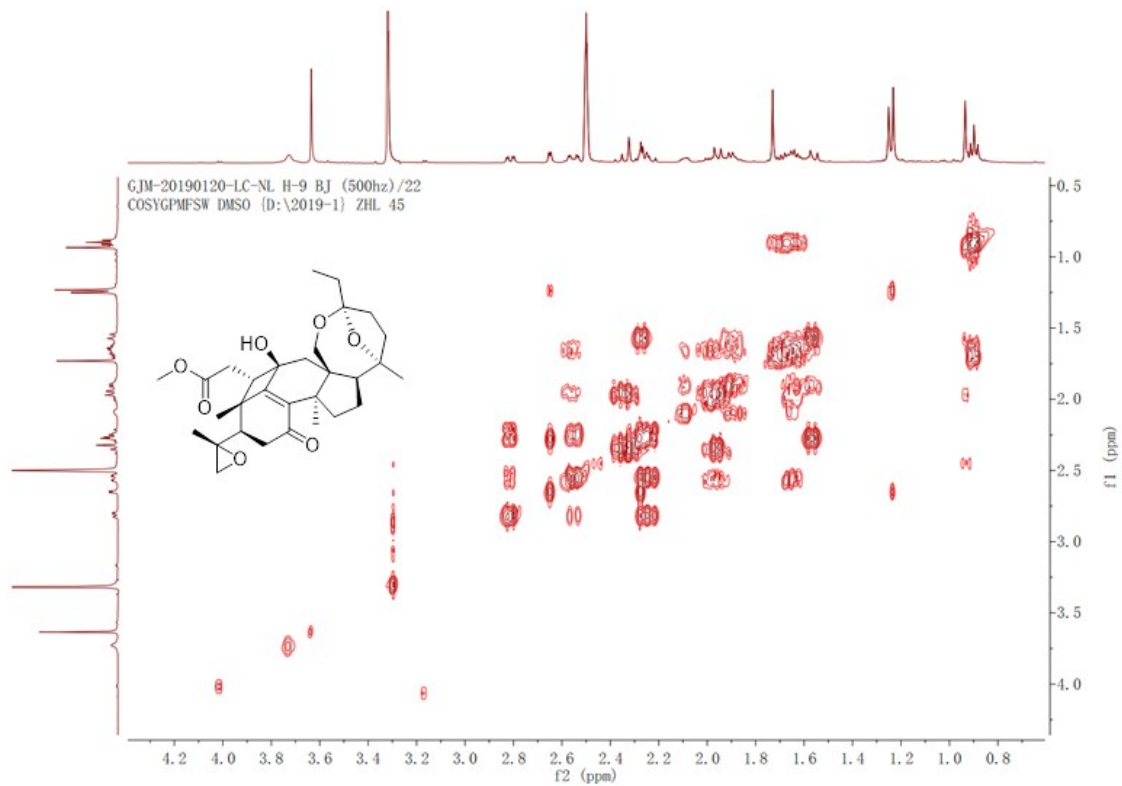

S15. NOESY spectrum (500 MHz) of ganorbifate B (2) in CDCl<sub>3</sub>.

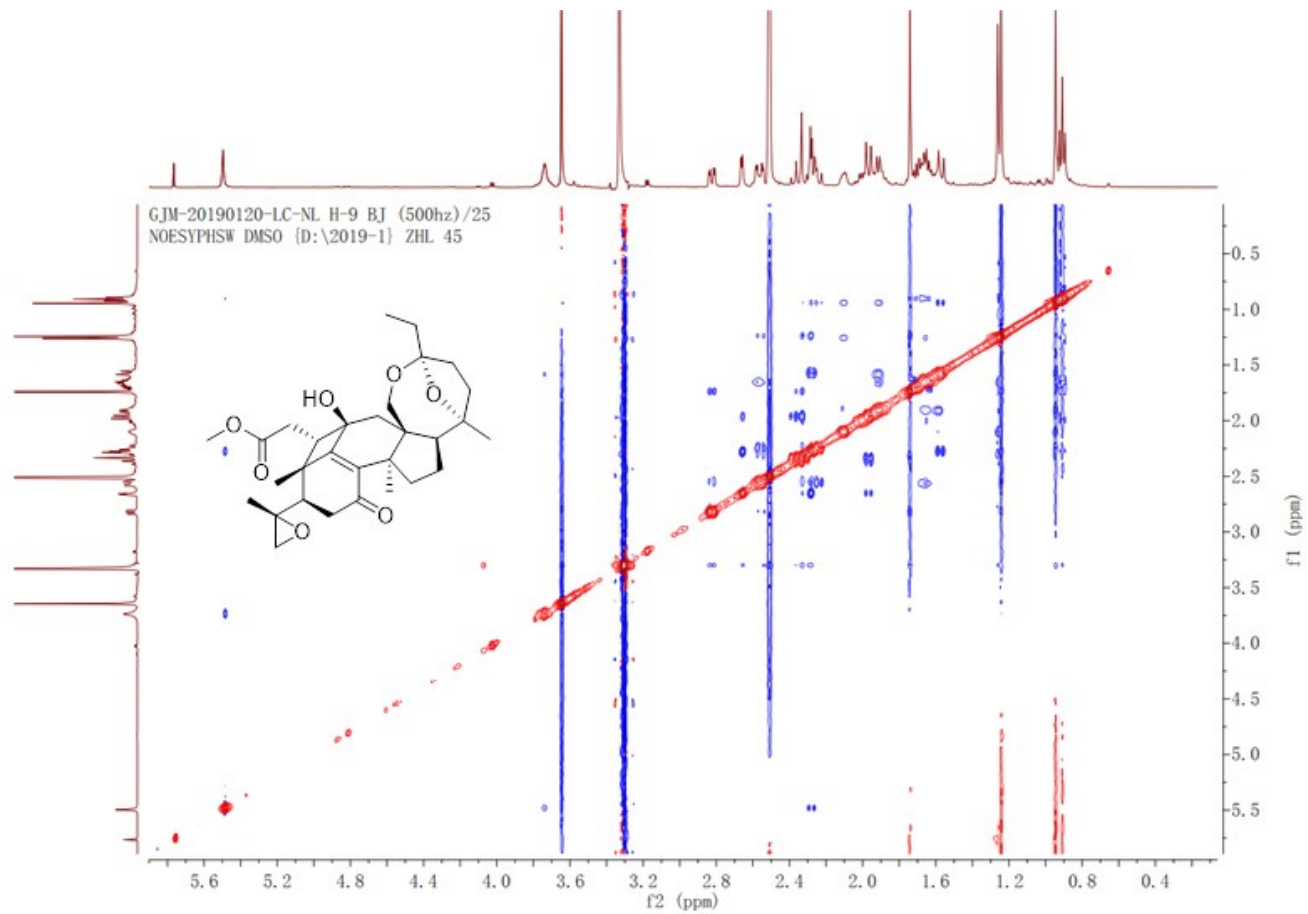

## S16. Structures and coordinates for trunc-1 used for ECD calculations

Conformer 1, DFT energy -1309.58409 au ( $\omega$ B97X-V/6-311+G(2df,2p))

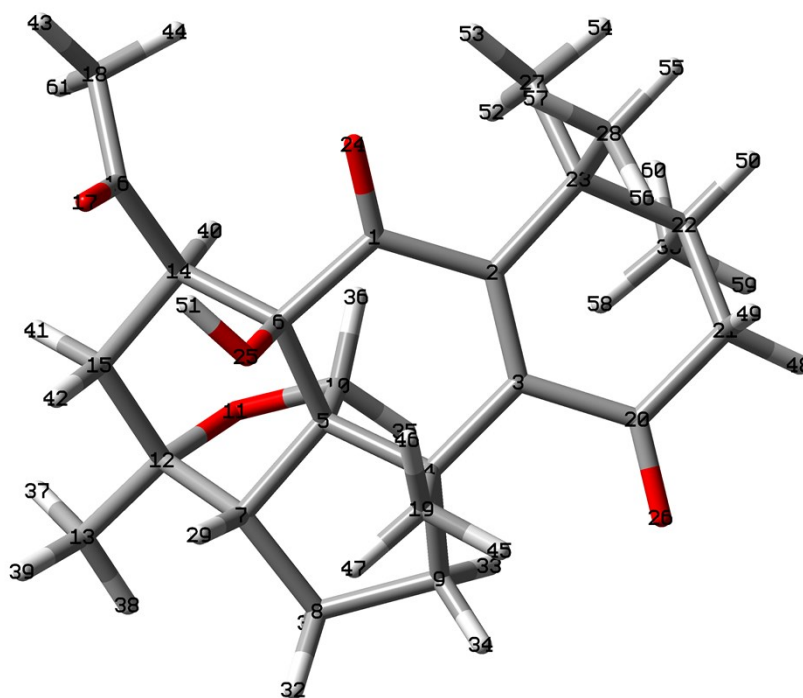

| Tag | Symbol | X        | Y        | Z        |
|-----|--------|----------|----------|----------|
| 1   | C      | -0.23091 | 1.337718 | -0.46029 |
| 2   | C      | -1.53919 | 0.619209 | -0.19284 |
| 3   | C      | -1.63625 | -0.72099 | -0.4142  |
| 4   | C      | -0.42366 | -1.54672 | -0.80008 |
| 5   | C      | 0.784283 | -0.88595 | -0.13055 |
| 6   | C      | 1.073492 | 0.522191 | -0.61337 |
| 7   | C      | 1.947676 | -1.84548 | -0.2791  |
| 8   | C      | 1.262751 | -3.21908 | -0.06291 |
| 9   | C      | -0.27414 | -3.00782 | -0.27293 |
| 10  | C      | 0.665189 | -0.8619  | 1.424603 |
| 11  | O      | 1.973062 | -1.09808 | 1.928806 |
| 12  | C      | 2.862372 | -1.28721 | 0.817727 |
| 13  | C      | 4.005011 | -2.17904 | 1.261942 |
| 14  | C      | 2.219949 | 1.128962 | 0.244912 |
| 15  | C      | 3.375419 | 0.105595 | 0.361857 |
| 16  | C      | 2.733276 | 2.452498 | -0.30759 |
| 17  | O      | 3.063593 | 2.568342 | -1.47648 |
| 18  | C      | 2.844612 | 3.597384 | 0.661139 |
| 19  | C      | -0.3709  | -1.61755 | -2.34388 |
| 20  | C      | -2.97227 | -1.3996  | -0.42373 |
| 21  | C      | -4.18174 | -0.562   | -0.09085 |

|    |   |          |          |          |
|----|---|----------|----------|----------|
| 22 | C | -3.83567 | 0.57372  | 0.870283 |
| 23 | C | -2.72144 | 1.479101 | 0.271226 |
| 24 | O | -0.17997 | 2.547073 | -0.59771 |
| 25 | O | 1.430475 | 0.490982 | -1.97393 |
| 26 | O | -3.07401 | -2.56716 | -0.75009 |
| 27 | C | -2.28545 | 2.490769 | 1.353091 |
| 28 | C | -3.27501 | 2.272464 | -0.93213 |
| 29 | H | 2.415366 | -1.77069 | -1.26318 |
| 30 | C | -3.50327 | -0.00132 | 2.255252 |
| 31 | H | 1.454678 | -3.59165 | 0.948143 |
| 32 | H | 1.658068 | -3.96493 | -0.75717 |
| 33 | H | -0.82341 | -3.16795 | 0.657745 |
| 34 | H | -0.68992 | -3.71684 | -0.98905 |
| 35 | H | -0.00949 | -1.63738 | 1.799851 |
| 36 | H | 0.288081 | 0.092731 | 1.811462 |
| 37 | H | 4.513621 | -1.74201 | 2.126934 |
| 38 | H | 3.636841 | -3.16889 | 1.544847 |
| 39 | H | 4.733587 | -2.29426 | 0.452841 |
| 40 | H | 1.8488   | 1.317726 | 1.254835 |
| 41 | H | 4.105285 | 0.47568  | 1.091661 |
| 42 | H | 3.887205 | 0.015745 | -0.60265 |
| 43 | H | 3.354946 | 4.44254  | 0.197397 |
| 44 | H | 1.829257 | 3.894677 | 0.948515 |
| 45 | H | -1.23656 | -2.19247 | -2.68653 |
| 46 | H | -0.38188 | -0.63204 | -2.80812 |
| 47 | H | 0.53544  | -2.13209 | -2.67775 |
| 48 | H | -4.95207 | -1.22462 | 0.314437 |
| 49 | H | -4.57273 | -0.17237 | -1.03932 |
| 50 | H | -4.72423 | 1.208648 | 0.982429 |
| 51 | H | 1.99201  | 1.271396 | -2.14535 |
| 52 | H | -1.68207 | 2.017941 | 2.135356 |
| 53 | H | -1.7055  | 3.305612 | 0.922174 |
| 54 | H | -3.17733 | 2.914603 | 1.82927  |
| 55 | H | -4.13222 | 2.878999 | -0.61728 |
| 56 | H | -3.59936 | 1.616906 | -1.74598 |
| 57 | H | -2.50625 | 2.940039 | -1.32671 |
| 58 | H | -2.56175 | -0.56309 | 2.250866 |
| 59 | H | -4.29483 | -0.68746 | 2.574107 |
| 60 | H | -3.42124 | 0.780696 | 3.013797 |
| 61 | H | 3.367635 | 3.285783 | 1.571986 |



Conformer 2, DFT energy -1309.57979 au ( $\omega$ B97X-V/6-311+G(2df,2p))

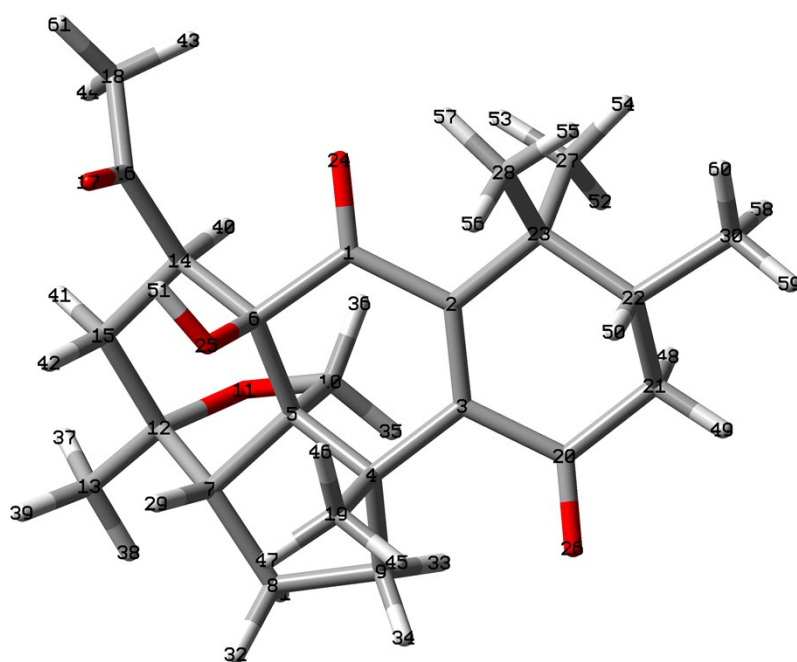

| Tag | Symbol | X        | Y        | Z        |
|-----|--------|----------|----------|----------|
| 1   | C      | 0.301292 | 1.254024 | 0.11264  |
| 2   | C      | 1.565908 | 0.411737 | 0.050477 |
| 3   | C      | 1.488005 | -0.94216 | 0.181614 |
| 4   | C      | 0.215684 | -1.63857 | 0.623932 |
| 5   | C      | -0.96803 | -0.85098 | 0.062936 |
| 6   | C      | -1.03594 | 0.594666 | 0.5169   |
| 7   | C      | -2.20599 | -1.67471 | 0.364761 |
| 8   | C      | -1.7008  | -3.11885 | 0.10723  |
| 9   | C      | -0.13631 | -3.07273 | 0.127851 |
| 10  | C      | -1.0254  | -0.86352 | -1.49532 |
| 11  | O      | -2.40388 | -0.94691 | -1.84029 |
| 12  | C      | -3.17548 | -1.03502 | -0.63306 |
| 13  | C      | -4.44735 | -1.80494 | -0.93023 |
| 14  | C      | -2.22352 | 1.296351 | -0.19523 |
| 15  | C      | -3.48611 | 0.404356 | -0.14053 |
| 16  | C      | -2.52316 | 2.68319  | 0.352687 |
| 17  | O      | -2.52782 | 2.918465 | 1.550857 |
| 18  | C      | -2.84642 | 3.748863 | -0.65852 |
| 19  | C      | 0.286462 | -1.71994 | 2.17039  |
| 20  | C      | 2.706314 | -1.79585 | 0.012085 |
| 21  | C      | 3.883513 | -1.13729 | -0.6444  |
| 22  | C      | 4.110891 | 0.235977 | -0.01139 |
| 23  | C      | 2.88195  | 1.17453  | -0.20329 |
| 24  | O      | 0.298309 | 2.437932 | -0.17816 |

|    |   |          |          |          |
|----|---|----------|----------|----------|
| 25 | O | -1.1674  | 0.654546 | 1.917963 |
| 26 | O | 2.724533 | -2.95235 | 0.387585 |
| 27 | C | 2.864045 | 1.762385 | -1.62958 |
| 28 | C | 3.012058 | 2.310881 | 0.835731 |
| 29 | H | -2.5479  | -1.53717 | 1.393066 |
| 30 | C | 5.437085 | 0.811774 | -0.51647 |
| 31 | H | -2.0527  | -3.48422 | -0.86238 |
| 32 | H | -2.08558 | -3.80611 | 0.864808 |
| 33 | H | 0.277153 | -3.28431 | -0.8612  |
| 34 | H | 0.284976 | -3.82448 | 0.795008 |
| 35 | H | -0.49838 | -1.71921 | -1.92555 |
| 36 | H | -0.58701 | 0.036049 | -1.94495 |
| 37 | H | -5.00752 | -1.31754 | -1.73443 |
| 38 | H | -4.2177  | -2.82679 | -1.24376 |
| 39 | H | -5.08299 | -1.84622 | -0.03968 |
| 40 | H | -1.97261 | 1.423417 | -1.2502  |
| 41 | H | -4.26121 | 0.844111 | -0.77942 |
| 42 | H | -3.87951 | 0.368832 | 0.881798 |
| 43 | H | -1.92109 | 3.993736 | -1.19228 |
| 44 | H | -3.56542 | 3.379148 | -1.39782 |
| 45 | H | 1.113979 | -2.38557 | 2.432771 |
| 46 | H | 0.440458 | -0.74612 | 2.630918 |
| 47 | H | -0.63595 | -2.14436 | 2.579051 |
| 48 | H | 3.683636 | -1.03222 | -1.72    |
| 49 | H | 4.754578 | -1.78808 | -0.53056 |
| 50 | H | 4.210669 | 0.077801 | 1.072844 |
| 51 | H | -1.58962 | 1.512419 | 2.124084 |
| 52 | H | 2.879176 | 0.974186 | -2.39117 |
| 53 | H | 1.972717 | 2.371072 | -1.78247 |
| 54 | H | 3.736259 | 2.40399  | -1.78838 |
| 55 | H | 4.006777 | 2.762182 | 0.778032 |
| 56 | H | 2.880874 | 1.918908 | 1.850858 |
| 57 | H | 2.276567 | 3.096388 | 0.670833 |
| 58 | H | 5.464325 | 0.849562 | -1.61067 |
| 59 | H | 6.26259  | 0.171982 | -0.18808 |
| 60 | H | 5.631286 | 1.819255 | -0.13819 |
| 61 | H | -3.23307 | 4.640929 | -0.16388 |

### S17. Structures and coordinates for trunc-2 used for ECD calculations

Conformer 1, DFT energy -1235.55923 au ( $\omega$ B97X-V/6-311+G(2df,2p))

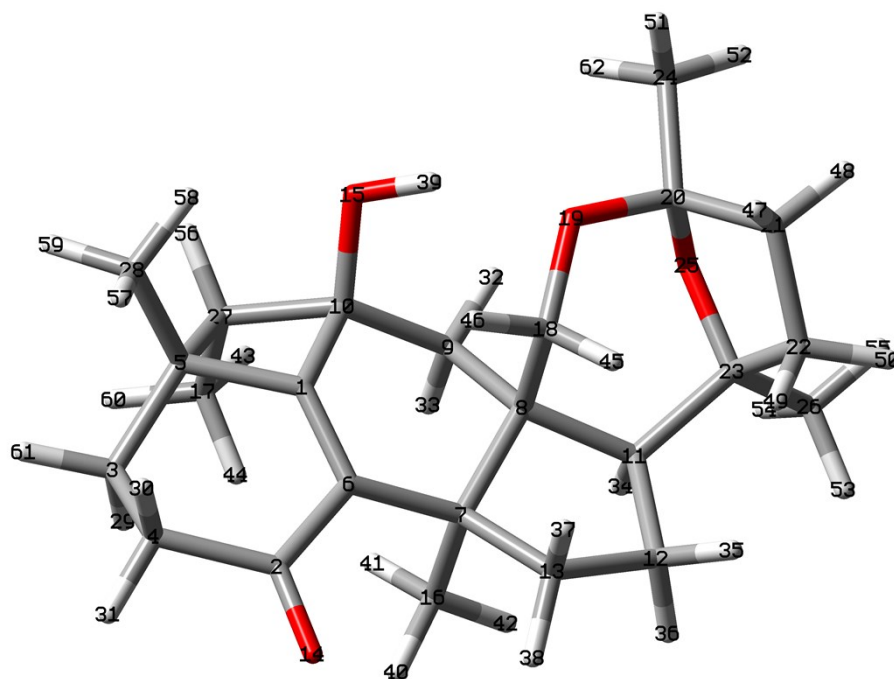

| Tag | Symbol | X        | Y        | Z        |
|-----|--------|----------|----------|----------|
| 1   | C      | -1.92831 | -0.43811 | -0.33029 |
| 2   | C      | -2.93212 | 1.685781 | -0.87444 |
| 3   | C      | -4.36169 | -0.17455 | 0.12431  |
| 4   | C      | -4.26384 | 0.935934 | -0.93515 |
| 5   | C      | -3.21751 | -1.17357 | -0.08724 |
| 6   | C      | -1.75023 | 0.883256 | -0.48553 |
| 7   | C      | -0.48462 | 1.516936 | 0.060139 |
| 8   | C      | 0.627973 | 0.42702  | 0.230113 |
| 9   | C      | 0.107371 | -0.69819 | 1.161823 |
| 10  | C      | -1.06899 | -1.40473 | 0.464173 |
| 11  | C      | 1.827858 | 1.277388 | 0.72774  |
| 12  | C      | 1.622905 | 2.675607 | 0.055964 |
| 13  | C      | 0.270381 | 2.618771 | -0.70164 |
| 14  | O      | -2.86616 | 2.878592 | -1.11986 |
| 15  | O      | -0.64644 | -2.55684 | -0.24071 |
| 16  | C      | -0.92394 | 2.151613 | 1.410417 |
| 17  | C      | -2.71786 | -1.23657 | 2.52158  |
| 18  | C      | 0.996788 | -0.1726  | -1.15734 |
| 19  | O      | 1.697237 | -1.40893 | -1.07378 |
| 20  | C      | 3.026168 | -1.41045 | -0.55947 |
| 21  | C      | 3.971396 | -0.59251 | -1.44911 |
| 22  | C      | 3.913495 | 0.818911 | -0.85079 |

|    |   |          |          |          |
|----|---|----------|----------|----------|
| 23 | C | 3.235259 | 0.636416 | 0.542633 |
| 24 | C | 3.382414 | -2.87434 | -0.39952 |
| 25 | O | 3.110551 | -0.78948 | 0.695084 |
| 26 | C | 4.159375 | 1.108251 | 1.659876 |
| 27 | C | -2.43249 | -1.80684 | 1.145958 |
| 28 | C | -3.58958 | -2.24062 | -1.11981 |
| 29 | H | -4.29152 | 0.285565 | 1.116777 |
| 30 | H | -4.36527 | 0.509136 | -1.94236 |
| 31 | H | -5.05819 | 1.678876 | -0.82419 |
| 32 | H | 0.892555 | -1.41901 | 1.393745 |
| 33 | H | -0.20441 | -0.25675 | 2.112514 |
| 34 | H | 1.707093 | 1.390847 | 1.810967 |
| 35 | H | 2.442563 | 2.949975 | -0.61165 |
| 36 | H | 1.594097 | 3.456985 | 0.820827 |
| 37 | H | 0.408804 | 2.35499  | -1.75513 |
| 38 | H | -0.26558 | 3.569479 | -0.68444 |
| 39 | H | 0.245763 | -2.38517 | -0.59072 |
| 40 | H | -1.64228 | 2.94762  | 1.195743 |
| 41 | H | -1.41407 | 1.432167 | 2.068102 |
| 42 | H | -0.09413 | 2.597474 | 1.964279 |
| 43 | H | -2.0201  | -1.65034 | 3.257254 |
| 44 | H | -2.62535 | -0.14631 | 2.551115 |
| 45 | H | 1.570915 | 0.538449 | -1.75683 |
| 46 | H | 0.103436 | -0.40873 | -1.73605 |
| 47 | H | 3.668181 | -0.6399  | -2.49781 |
| 48 | H | 4.978505 | -1.01136 | -1.3696  |
| 49 | H | 3.366352 | 1.499907 | -1.50255 |
| 50 | H | 4.912947 | 1.244869 | -0.72781 |
| 51 | H | 3.353631 | -3.37648 | -1.36998 |
| 52 | H | 4.382923 | -2.9691  | 0.028508 |
| 53 | H | 4.256607 | 2.199482 | 1.637238 |
| 54 | H | 3.758925 | 0.815542 | 2.635215 |
| 55 | H | 5.153943 | 0.66532  | 1.547435 |
| 56 | H | -2.5166  | -2.898   | 1.16453  |
| 57 | H | -3.95488 | -1.78268 | -2.04607 |
| 58 | H | -2.72904 | -2.86733 | -1.36011 |
| 59 | H | -4.38806 | -2.8763  | -0.71956 |
| 60 | H | -3.73432 | -1.48857 | 2.842166 |
| 61 | H | -5.33875 | -0.66837 | 0.068304 |
| 62 | H | 2.662555 | -3.35595 | 0.267838 |

### S18. Coordinates of 1 used for NMR calculations

All conformers with population > 5% at 300K are listed. The structure refers to the lowest energy conformer.

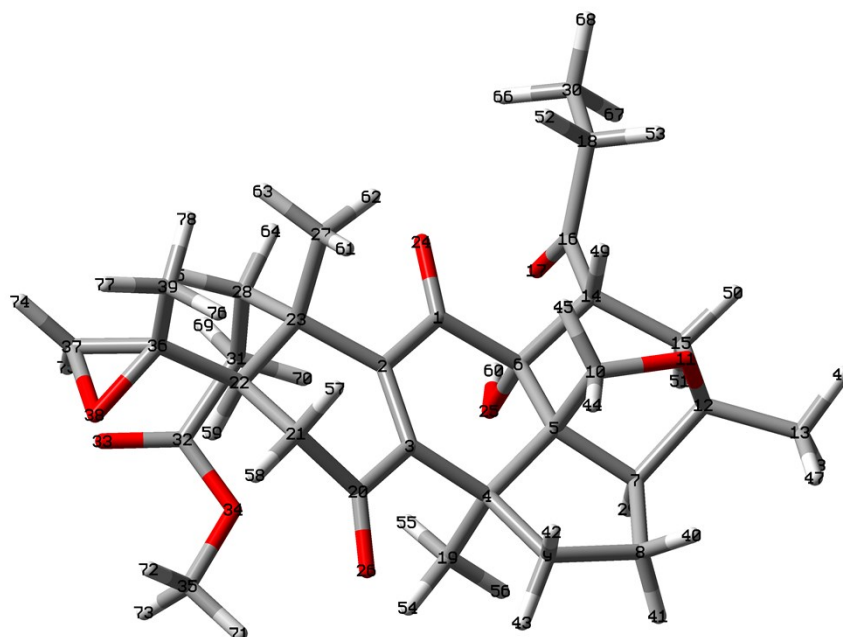

Conformer 1, DFT energy -1769.17077 au ( $\omega$ B97X-V/6-311+G(2df,2p))

| Tag | Symbol | X        | Y        | Z        |
|-----|--------|----------|----------|----------|
| 1   | C      | 0.108668 | -1.00784 | 0.30335  |
| 2   | C      | 0.160319 | 0.017273 | -0.81383 |
| 3   | C      | 0.167153 | 1.345732 | -0.51845 |
| 4   | C      | -0.07862 | 1.868284 | 0.881795 |
| 5   | C      | 0.48616  | 0.847324 | 1.868495 |
| 6   | C      | -0.11895 | -0.53815 | 1.754177 |
| 7   | C      | 0.385166 | 1.48712  | 3.240424 |
| 8   | C      | 0.769311 | 2.959634 | 2.934349 |
| 9   | C      | 0.613077 | 3.167509 | 1.390282 |
| 10  | C      | 2.035621 | 0.693315 | 1.772901 |
| 11  | O      | 2.498984 | 0.516192 | 3.106857 |
| 12  | C      | 1.376782 | 0.600384 | 3.998034 |
| 13  | C      | 1.864395 | 1.118548 | 5.336726 |
| 14  | C      | 0.59478  | -1.49057 | 2.751705 |
| 15  | C      | 0.745504 | -0.81177 | 4.133214 |
| 16  | C      | -0.0889  | -2.84164 | 2.888478 |
| 17  | O      | -1.30111 | -2.93949 | 3.006359 |
| 18  | C      | 0.806371 | -4.05547 | 2.897721 |

|    |   |          |          |          |
|----|---|----------|----------|----------|
| 19 | C | -1.60448 | 2.122252 | 0.991885 |
| 20 | C | 0.302095 | 2.359955 | -1.61069 |
| 21 | C | 0.847651 | 1.839913 | -2.90732 |
| 22 | C | 0.032223 | 0.599376 | -3.28973 |
| 23 | C | 0.200698 | -0.55041 | -2.24841 |
| 24 | O | 0.243328 | -2.2026  | 0.095203 |
| 25 | O | -1.50863 | -0.4865  | 1.985613 |
| 26 | O | -0.02063 | 3.519825 | -1.44249 |
| 27 | C | 1.540927 | -1.29033 | -2.45029 |
| 28 | C | -0.9494  | -1.58788 | -2.43488 |
| 29 | H | -0.62019 | 1.404817 | 3.659905 |
| 30 | C | 0.074549 | -5.35701 | 3.191081 |
| 31 | C | -2.32884 | -1.24479 | -1.83214 |
| 32 | C | -3.02447 | -0.10917 | -2.54084 |
| 33 | O | -3.57722 | -0.2023  | -3.61406 |
| 34 | O | -2.92214 | 1.046077 | -1.86593 |
| 35 | C | -3.40817 | 2.207831 | -2.5426  |
| 36 | C | 0.246041 | 0.297929 | -4.77769 |
| 37 | C | -0.89458 | -0.15162 | -5.59177 |
| 38 | O | -0.51008 | 1.217657 | -5.57917 |
| 39 | C | 1.643352 | 0.088066 | -5.32592 |
| 40 | H | 1.80088  | 3.160722 | 3.238861 |
| 41 | H | 0.132229 | 3.650767 | 3.491657 |
| 42 | H | 1.582683 | 3.337642 | 0.915245 |
| 43 | H | 0.007104 | 4.042798 | 1.15686  |
| 44 | H | 2.518271 | 1.574577 | 1.342464 |
| 45 | H | 2.341881 | -0.16401 | 1.160662 |
| 46 | H | 2.647574 | 0.465658 | 5.734144 |
| 47 | H | 2.277056 | 2.125678 | 5.235433 |
| 48 | H | 1.039307 | 1.148516 | 6.055608 |
| 49 | H | 1.604602 | -1.68514 | 2.383936 |
| 50 | H | 1.387563 | -1.43534 | 4.766876 |
| 51 | H | -0.23104 | -0.735   | 4.624948 |
| 52 | H | 1.286099 | -4.08018 | 1.910035 |
| 53 | H | 1.618049 | -3.87353 | 3.616046 |
| 54 | H | -1.85074 | 2.955735 | 0.327985 |
| 55 | H | -2.19721 | 1.255505 | 0.710591 |
| 56 | H | -1.87346 | 2.407177 | 2.013904 |
| 57 | H | 1.910162 | 1.596718 | -2.77559 |
| 58 | H | 0.759042 | 2.618028 | -3.6688  |
| 59 | H | -1.01137 | 0.91649  | -3.24341 |
| 60 | H | -1.77112 | -1.36641 | 2.324364 |
| 61 | H | 2.378071 | -0.59332 | -2.56245 |
| 62 | H | 1.748614 | -1.9493  | -1.60731 |

|    |   |          |          |          |
|----|---|----------|----------|----------|
| 63 | H | 1.493497 | -1.91571 | -3.3464  |
| 64 | H | -0.63665 | -2.52988 | -1.98497 |
| 65 | H | -1.06726 | -1.77358 | -3.5069  |
| 66 | H | -0.70904 | -5.53333 | 2.449794 |
| 67 | H | -0.40288 | -5.32607 | 4.174644 |
| 68 | H | 0.770288 | -6.20066 | 3.170096 |
| 69 | H | -2.96717 | -2.12497 | -1.94865 |
| 70 | H | -2.25349 | -1.02258 | -0.76461 |
| 71 | H | -3.17603 | 3.044375 | -1.88496 |
| 72 | H | -2.89863 | 2.326298 | -3.50363 |
| 73 | H | -4.48391 | 2.130833 | -2.71251 |
| 74 | H | -0.69515 | -0.67886 | -6.52526 |
| 75 | H | -1.85796 | -0.36163 | -5.132   |
| 76 | H | 2.339105 | 0.839308 | -4.93882 |
| 77 | H | 1.611614 | 0.194378 | -6.41304 |
| 78 | H | 2.042659 | -0.89919 | -5.08721 |

Conformer 2, DFT energy -1769.16991 au ( $\omega$ B97X-V/6-311+G(2df,2p))

| Tag | Symbol | X        | Y        | Z        |
|-----|--------|----------|----------|----------|
| 1   | C      | 0.109179 | -1.03104 | 0.307021 |
| 2   | C      | 0.223322 | -0.03438 | -0.83257 |
| 3   | C      | 0.33455  | 1.296598 | -0.56575 |
| 4   | C      | 0.108729 | 1.864708 | 0.822028 |
| 5   | C      | 0.579575 | 0.825952 | 1.83996  |
| 6   | C      | -0.11922 | -0.5169  | 1.741687 |
| 7   | C      | 0.495417 | 1.499052 | 3.196976 |
| 8   | C      | 0.987516 | 2.934571 | 2.872132 |
| 9   | C      | 0.882914 | 3.120601 | 1.321226 |
| 10  | C      | 2.115408 | 0.561938 | 1.781586 |
| 11  | O      | 2.536633 | 0.377885 | 3.128361 |
| 12  | C      | 1.406106 | 0.561396 | 3.993504 |
| 13  | C      | 1.903036 | 1.072741 | 5.331227 |
| 14  | C      | 0.505839 | -1.4941  | 2.773    |
| 15  | C      | 0.673753 | -0.79982 | 4.143918 |
| 16  | C      | -0.26839 | -2.794   | 2.918156 |
| 17  | O      | -1.48774 | -2.81254 | 2.988639 |
| 18  | C      | 0.548221 | -4.05918 | 3.00751  |
| 19  | C      | -1.39651 | 2.230031 | 0.897786 |
| 20  | C      | 0.562039 | 2.279006 | -1.67226 |
| 21  | C      | 0.989006 | 1.698298 | -2.99112 |
| 22  | C      | 0.083755 | 0.502641 | -3.2979  |
| 23  | C      | 0.253318 | -0.63724 | -2.25177 |
| 24  | O      | 0.203133 | -2.23302 | 0.125065 |

|    |   |          |          |          |
|----|---|----------|----------|----------|
| 25 | O | -1.50583 | -0.36172 | 1.942871 |
| 26 | O | 0.401715 | 3.473225 | -1.50471 |
| 27 | C | 1.595584 | -1.38547 | -2.42032 |
| 28 | C | -0.90995 | -1.66014 | -2.4461  |
| 29 | H | -0.52186 | 1.494973 | 3.594878 |
| 30 | C | -0.26926 | -5.29752 | 3.34498  |
| 31 | C | -2.28281 | -1.3015  | -1.8417  |
| 32 | C | -2.95664 | -0.14448 | -2.53526 |
| 33 | O | -3.41395 | -0.17328 | -3.65538 |
| 34 | O | -2.95975 | 0.961559 | -1.77035 |
| 35 | C | -3.48753 | 2.13842  | -2.3769  |
| 36 | C | 0.182303 | 0.162407 | -4.79584 |
| 37 | C | 1.457906 | -0.21392 | -5.4193  |
| 38 | O | 0.433556 | -1.18114 | -5.20514 |
| 39 | C | -0.85532 | 0.87393  | -5.63511 |
| 40 | H | 2.022938 | 3.071203 | 3.198595 |
| 41 | H | 0.386612 | 3.679599 | 3.39955  |
| 42 | H | 1.872797 | 3.209321 | 0.86672  |
| 43 | H | 0.348727 | 4.032705 | 1.055504 |
| 44 | H | 2.667015 | 1.399593 | 1.346995 |
| 45 | H | 2.373856 | -0.32616 | 1.191626 |
| 46 | H | 2.632086 | 0.37568  | 5.756504 |
| 47 | H | 2.386003 | 2.047069 | 5.219282 |
| 48 | H | 1.068781 | 1.173432 | 6.032966 |
| 49 | H | 1.508197 | -1.76377 | 2.434041 |
| 50 | H | 1.257676 | -1.45289 | 4.803706 |
| 51 | H | -0.30481 | -0.64386 | 4.61271  |
| 52 | H | 1.044355 | -4.1611  | 2.032653 |
| 53 | H | 1.355508 | -3.89389 | 3.734441 |
| 54 | H | -1.56974 | 3.061716 | 0.208386 |
| 55 | H | -2.04401 | 1.39961  | 0.627321 |
| 56 | H | -1.66268 | 2.562602 | 1.905775 |
| 57 | H | 2.041114 | 1.390138 | -2.93524 |
| 58 | H | 0.910133 | 2.477773 | -3.75402 |
| 59 | H | -0.93644 | 0.874953 | -3.16133 |
| 60 | H | -1.83742 | -1.21755 | 2.28403  |
| 61 | H | 2.446986 | -0.69578 | -2.40424 |
| 62 | H | 1.728718 | -2.10124 | -1.60839 |
| 63 | H | 1.599289 | -1.93599 | -3.36236 |
| 64 | H | -0.6102  | -2.61207 | -2.00822 |
| 65 | H | -1.03136 | -1.82867 | -3.51914 |
| 66 | H | -1.0474  | -5.46169 | 2.59528  |
| 67 | H | -0.76285 | -5.18933 | 4.315159 |
| 68 | H | 0.372939 | -6.18252 | 3.37977  |



|    |   |          |          |          |
|----|---|----------|----------|----------|
| 69 | H | -2.93453 | -2.16924 | -1.97835 |
| 70 | H | -2.21967 | -1.09594 | -0.77082 |
| 71 | H | -3.42582 | 2.913095 | -1.61288 |
| 72 | H | -2.88882 | 2.41877  | -3.24906 |
| 73 | H | -4.5215  | 1.9815   | -2.69034 |
| 74 | H | 1.641066 | 0.043015 | -6.4624  |
| 75 | H | 2.352253 | -0.34258 | -4.81052 |
| 76 | H | -1.85709 | 0.540425 | -5.34951 |
| 77 | H | -0.70282 | 0.66508  | -6.69695 |
| 78 | H | -0.79766 | 1.958446 | -5.48229 |

Conformer 3, DFT energy -1769.16907 au ( $\omega$ B97X-V/6-311+G(2df,2p))

| Tag | Symbol | X        | Y        | Z        |
|-----|--------|----------|----------|----------|
| 1   | C      | 0.547761 | -0.5258  | 0.112808 |
| 2   | C      | 0.598396 | 0.434531 | -1.05186 |
| 3   | C      | 0.66909  | 1.773048 | -0.82043 |
| 4   | C      | 0.322485 | 2.369181 | 0.532497 |
| 5   | C      | 0.620725 | 1.34824  | 1.63745  |
| 6   | C      | -0.03069 | -0.01436 | 1.440951 |
| 7   | C      | 0.281092 | 2.055007 | 2.937791 |
| 8   | C      | 0.839082 | 3.480731 | 2.67162  |
| 9   | C      | 1.021897 | 3.628187 | 1.121454 |
| 10  | C      | 2.142123 | 1.098519 | 1.884807 |
| 11  | O      | 2.288644 | 0.93443  | 3.293562 |
| 12  | C      | 1.014041 | 1.139202 | 3.919102 |
| 13  | C      | 1.24278  | 1.689081 | 5.313569 |
| 14  | C      | 0.36897  | -0.95462 | 2.612803 |
| 15  | C      | 0.252676 | -0.21567 | 3.962204 |
| 16  | C      | -0.43648 | -2.24416 | 2.596412 |
| 17  | O      | -1.6596  | -2.20949 | 2.549406 |
| 18  | C      | 0.317107 | -3.54483 | 2.643439 |
| 19  | C      | -1.17667 | 2.763715 | 0.396475 |
| 20  | C      | 0.914374 | 2.72493  | -1.95246 |
| 21  | C      | 0.923487 | 2.163366 | -3.35325 |
| 22  | C      | 0.10141  | 0.879324 | -3.44158 |
| 23  | C      | 0.628785 | -0.19781 | -2.45435 |
| 24  | O      | 0.996355 | -1.65375 | 0.02029  |
| 25  | O      | -1.42714 | 0.127004 | 1.315189 |
| 26  | O      | 1.10794  | 3.906849 | -1.7428  |
| 27  | C      | 2.073012 | -0.66353 | -2.73731 |
| 28  | C      | -0.29522 | -1.44567 | -2.5169  |
| 29  | H      | -0.79292 | 2.065545 | 3.136388 |
| 30  | C      | -0.5767  | -4.77092 | 2.527803 |

|    |   |          |          |          |
|----|---|----------|----------|----------|
| 31 | C | -1.69273 | -1.26311 | -1.90897 |
| 32 | C | -2.11971 | -2.42358 | -1.029   |
| 33 | O | -1.46344 | -3.40741 | -0.77831 |
| 34 | O | -3.35047 | -2.21248 | -0.54431 |
| 35 | C | -3.85635 | -3.23542 | 0.319344 |
| 36 | C | -0.09411 | 0.484707 | -4.90486 |
| 37 | C | -1.43972 | 0.110889 | -5.3621  |
| 38 | O | -0.94561 | 1.424291 | -5.57437 |
| 39 | C | 1.085553 | 0.041678 | -5.74362 |
| 40 | H | 1.79882  | 3.619665 | 3.178716 |
| 41 | H | 0.1592   | 4.242251 | 3.062236 |
| 42 | H | 2.075739 | 3.689989 | 0.844286 |
| 43 | H | 0.56073  | 4.54041  | 0.743362 |
| 44 | H | 2.764458 | 1.93432  | 1.558453 |
| 45 | H | 2.518218 | 0.203936 | 1.376349 |
| 46 | H | 1.873596 | 1.006719 | 5.891447 |
| 47 | H | 1.740778 | 2.661553 | 5.270166 |
| 48 | H | 0.288387 | 1.807157 | 5.83721  |
| 49 | H | 1.417116 | -1.22704 | 2.488061 |
| 50 | H | 0.678638 | -0.84774 | 4.74955  |
| 51 | H | -0.79953 | -0.0418  | 4.210722 |
| 52 | H | 1.045126 | -3.50348 | 1.824684 |
| 53 | H | 0.909091 | -3.54806 | 3.571263 |
| 54 | H | -1.2496  | 3.562761 | -0.347   |
| 55 | H | -1.80525 | 1.929128 | 0.095341 |
| 56 | H | -1.56579 | 3.156146 | 1.339713 |
| 57 | H | 1.969675 | 1.998828 | -3.64229 |
| 58 | H | 0.526793 | 2.93053  | -4.02399 |
| 59 | H | -0.90765 | 1.13812  | -3.08984 |
| 60 | H | -1.8383  | -0.67867 | 1.687755 |
| 61 | H | 2.769972 | 0.175431 | -2.82304 |
| 62 | H | 2.40976  | -1.30182 | -1.91808 |
| 63 | H | 2.127845 | -1.25093 | -3.65573 |
| 64 | H | 0.193335 | -2.27522 | -2.00614 |
| 65 | H | -0.38297 | -1.74005 | -3.5675  |
| 66 | H | -1.10787 | -4.75397 | 1.572346 |
| 67 | H | -1.31718 | -4.80035 | 3.33157  |
| 68 | H | 0.022633 | -5.68403 | 2.57459  |
| 69 | H | -1.75847 | -0.37013 | -1.2751  |
| 70 | H | -2.46826 | -1.12803 | -2.6705  |
| 71 | H | -4.87207 | -2.92805 | 0.568137 |
| 72 | H | -3.86433 | -4.19931 | -0.19582 |
| 73 | H | -3.24399 | -3.30395 | 1.22036  |
| 74 | H | -1.5528  | -0.49802 | -6.2592  |

|    |   |          |          |          |
|----|---|----------|----------|----------|
| 75 | H | -2.25675 | 0.031079 | -4.64524 |
| 76 | H | 1.979957 | 0.637399 | -5.53502 |
| 77 | H | 0.833971 | 0.166129 | -6.79983 |
| 78 | H | 1.326761 | -1.01072 | -5.57087 |

Conformer 4, DFT energy -1769.16888 au ( $\omega$ B97X-V/6-311+G(2df,2p))

| Tag | Symbol | X        | Y        | Z        |
|-----|--------|----------|----------|----------|
| 1   | C      | 0.36681  | -0.66204 | 0.288745 |
| 2   | C      | 0.49422  | 0.374555 | -0.81261 |
| 3   | C      | 0.476783 | 1.701778 | -0.50767 |
| 4   | C      | 0.04261  | 2.204078 | 0.855647 |
| 5   | C      | 0.469479 | 1.177778 | 1.905168 |
| 6   | C      | -0.08431 | -0.21942 | 1.693476 |
| 7   | C      | 0.151399 | 1.798228 | 3.253387 |
| 8   | C      | 0.548565 | 3.280753 | 3.024545 |
| 9   | C      | 0.625453 | 3.507177 | 1.477245 |
| 10  | C      | 2.01801  | 1.054125 | 2.042467 |
| 11  | O      | 2.278629 | 0.864039 | 3.429283 |
| 12  | C      | 1.034657 | 0.919828 | 4.143289 |
| 13  | C      | 1.304849 | 1.430928 | 5.544684 |
| 14  | C      | 0.495892 | -1.16737 | 2.775994 |
| 15  | C      | 0.416168 | -0.50488 | 4.169989 |
| 16  | C      | -0.1595  | -2.53846 | 2.790897 |
| 17  | O      | -1.36941 | -2.67561 | 2.690265 |
| 18  | C      | 0.759103 | -3.72088 | 2.972047 |
| 19  | C      | -1.48779 | 2.431354 | 0.739264 |
| 20  | C      | 0.746816 | 2.730354 | -1.5653  |
| 21  | C      | 1.256199 | 2.211377 | -2.87979 |
| 22  | C      | 0.436265 | 0.977395 | -3.2636  |
| 23  | C      | 0.635875 | -0.18081 | -2.24321 |
| 24  | O      | 0.624072 | -1.83849 | 0.097397 |
| 25  | O      | -1.49448 | -0.19862 | 1.720981 |
| 26  | O      | 0.561948 | 3.912972 | -1.35422 |
| 27  | C      | 2.011773 | -0.86208 | -2.3969  |
| 28  | C      | -0.46701 | -1.24733 | -2.49427 |
| 29  | H      | -0.90359 | 1.692739 | 3.515649 |
| 30  | C      | 0.033151 | -5.04398 | 3.163692 |
| 31  | C      | -1.86945 | -0.84221 | -2.02814 |
| 32  | C      | -2.95346 | -1.57878 | -2.77919 |
| 33  | O      | -2.90504 | -1.88303 | -3.95067 |
| 34  | O      | -4.01421 | -1.82432 | -2.0004  |
| 35  | C      | -5.11733 | -2.45712 | -2.64831 |
| 36  | C      | 0.610629 | 0.677785 | -4.75493 |

|    |   |          |          |          |
|----|---|----------|----------|----------|
| 37 | C | -0.55527 | 0.222834 | -5.52741 |
| 38 | O | -0.16721 | 1.590337 | -5.54289 |
| 39 | C | 1.991943 | 0.442919 | -5.33118 |
| 40 | H | 1.517667 | 3.495897 | 3.484706 |
| 41 | H | -0.17891 | 3.953242 | 3.485576 |
| 42 | H | 1.651118 | 3.700201 | 1.15566  |
| 43 | H | 0.046856 | 4.375686 | 1.163684 |
| 44 | H | 2.54     | 1.951765 | 1.701998 |
| 45 | H | 2.431017 | 0.212982 | 1.472458 |
| 46 | H | 2.035938 | 0.790089 | 6.047553 |
| 47 | H | 1.703383 | 2.448926 | 5.516952 |
| 48 | H | 0.381216 | 1.43229  | 6.13317  |
| 49 | H | 1.555292 | -1.32825 | 2.566807 |
| 50 | H | 0.964512 | -1.12353 | 4.890055 |
| 51 | H | -0.62555 | -0.45036 | 4.505222 |
| 52 | H | 1.39654  | -3.74052 | 2.077721 |
| 53 | H | 1.434447 | -3.50166 | 3.810681 |
| 54 | H | -1.6533  | 3.245961 | 0.028082 |
| 55 | H | -2.01799 | 1.542171 | 0.404791 |
| 56 | H | -1.90933 | 2.733118 | 1.702753 |
| 57 | H | 2.322087 | 1.970006 | -2.77421 |
| 58 | H | 1.158483 | 3.001813 | -3.62762 |
| 59 | H | -0.61436 | 1.286254 | -3.18763 |
| 60 | H | -1.78316 | -1.09328 | 1.995152 |
| 61 | H | 2.825881 | -0.13422 | -2.47214 |
| 62 | H | 2.209205 | -1.5155  | -1.54713 |
| 63 | H | 2.026139 | -1.48537 | -3.29494 |
| 64 | H | -0.18684 | -2.17869 | -2.00092 |
| 65 | H | -0.49381 | -1.45376 | -3.56626 |
| 66 | H | -0.60908 | -5.25935 | 2.306074 |
| 67 | H | -0.60241 | -5.01815 | 4.053422 |
| 68 | H | 0.751186 | -5.86128 | 3.275366 |
| 69 | H | -2.00966 | -0.99011 | -0.95385 |
| 70 | H | -2.05527 | 0.22497  | -2.21102 |
| 71 | H | -5.87653 | -2.58424 | -1.87743 |
| 72 | H | -5.49462 | -1.83079 | -3.46076 |
| 73 | H | -4.81815 | -3.42536 | -3.05642 |
| 74 | H | -0.39343 | -0.3184  | -6.45976 |
| 75 | H | -1.49666 | -0.00136 | -5.02749 |
| 76 | H | 2.720008 | 1.158555 | -4.9346  |
| 77 | H | 1.946286 | 0.577312 | -6.41496 |
| 78 | H | 2.358549 | -0.56495 | -5.12417 |

Conformer 5, DFT energy -1769.16880 au ( $\omega$ B97X-V/6-311+G(2df,2p))

| Tag | Symbol | X        | Y        | Z        |
|-----|--------|----------|----------|----------|
| 1   | C      | 0.032536 | -1.05103 | 0.359324 |
| 2   | C      | 0.05514  | -0.01844 | -0.75291 |
| 3   | C      | 0.033143 | 1.308041 | -0.45204 |
| 4   | C      | -0.20837 | 1.81533  | 0.95382  |
| 5   | C      | 0.403608 | 0.805451 | 1.924321 |
| 6   | C      | -0.16707 | -0.59602 | 1.820534 |
| 7   | C      | 0.321775 | 1.439831 | 3.300572 |
| 8   | C      | 0.657346 | 2.923022 | 2.991553 |
| 9   | C      | 0.455992 | 3.132111 | 1.453524 |
| 10  | C      | 1.953646 | 0.690568 | 1.78774  |
| 11  | O      | 2.457641 | 0.526496 | 3.108166 |
| 12  | C      | 1.358195 | 0.580254 | 4.028922 |
| 13  | C      | 1.867302 | 1.109102 | 5.355492 |
| 14  | C      | 0.594265 | -1.53018 | 2.798656 |
| 15  | C      | 0.769061 | -0.84749 | 4.178073 |
| 16  | C      | -0.03886 | -2.90068 | 2.982506 |
| 17  | O      | -1.24889 | -3.06939 | 2.973722 |
| 18  | C      | 0.902509 | -4.05879 | 3.222866 |
| 19  | C      | -1.73851 | 2.02198  | 1.091238 |
| 20  | C      | 0.137343 | 2.329749 | -1.54023 |
| 21  | C      | 0.703839 | 1.829551 | -2.83564 |
| 22  | C      | -0.08023 | 0.571756 | -3.2274  |
| 23  | C      | 0.108714 | -0.57851 | -2.1903  |
| 24  | O      | 0.164916 | -2.24283 | 0.13487  |
| 25  | O      | -1.55073 | -0.5826  | 2.090588 |
| 26  | O      | -0.2218  | 3.47874  | -1.36899 |
| 27  | C      | 1.464881 | -1.28945 | -2.39131 |
| 28  | C      | -1.01967 | -1.63713 | -2.3872  |
| 29  | H      | -0.66921 | 1.328267 | 3.746938 |
| 30  | C      | 1.465752 | -4.59915 | 1.899506 |
| 31  | C      | -2.40541 | -1.32591 | -1.7819  |
| 32  | C      | -3.12054 | -0.19748 | -2.48321 |
| 33  | O      | -3.666   | -0.29222 | -3.55993 |
| 34  | O      | -3.04338 | 0.954052 | -1.79831 |
| 35  | C      | -3.54815 | 2.111805 | -2.46815 |
| 36  | C      | 0.149111 | 0.281759 | -4.71537 |
| 37  | C      | -0.97853 | -0.18084 | -5.5399  |
| 38  | O      | -0.61625 | 1.194016 | -5.51658 |
| 39  | C      | 1.553518 | 0.095932 | -5.25413 |
| 40  | H      | 1.690657 | 3.15132  | 3.27039  |
| 41  | H      | 0.016275 | 3.594212 | 3.568478 |

|    |   |          |          |          |
|----|---|----------|----------|----------|
| 42 | H | 1.40804  | 3.333837 | 0.955867 |
| 43 | H | -0.18153 | 3.989776 | 1.238802 |
| 44 | H | 2.402365 | 1.583055 | 1.343582 |
| 45 | H | 2.265076 | -0.15954 | 1.167835 |
| 46 | H | 2.679214 | 0.477092 | 5.729491 |
| 47 | H | 2.249201 | 2.1283   | 5.245525 |
| 48 | H | 1.060977 | 1.115106 | 6.097011 |
| 49 | H | 1.600985 | -1.70207 | 2.409273 |
| 50 | H | 1.446039 | -1.45316 | 4.791689 |
| 51 | H | -0.19357 | -0.79587 | 4.699736 |
| 52 | H | 1.728203 | -3.72962 | 3.86562  |
| 53 | H | 0.344888 | -4.84219 | 3.742935 |
| 54 | H | -2.0225  | 2.849073 | 0.43451  |
| 55 | H | -2.30824 | 1.137362 | 0.817586 |
| 56 | H | -1.99846 | 2.294795 | 2.119022 |
| 57 | H | 1.770731 | 1.609878 | -2.69758 |
| 58 | H | 0.602028 | 2.608178 | -3.59486 |
| 59 | H | -1.13123 | 0.863941 | -3.18582 |
| 60 | H | -1.78612 | -1.49462 | 2.356128 |
| 61 | H | 2.287682 | -0.57465 | -2.49431 |
| 62 | H | 1.682424 | -1.95056 | -1.55263 |
| 63 | H | 1.435303 | -1.90932 | -3.29183 |
| 64 | H | -0.68867 | -2.57714 | -1.94628 |
| 65 | H | -1.13429 | -1.81332 | -3.4612  |
| 66 | H | 2.028252 | -3.83293 | 1.359503 |
| 67 | H | 0.656497 | -4.93647 | 1.247451 |
| 68 | H | 2.132982 | -5.44275 | 2.097104 |
| 69 | H | -3.02679 | -2.21699 | -1.90765 |
| 70 | H | -2.33507 | -1.11204 | -0.71241 |
| 71 | H | -4.62728 | 2.028431 | -2.61619 |
| 72 | H | -3.30696 | 2.95168  | -1.81805 |
| 73 | H | -3.05913 | 2.229614 | -3.43957 |
| 74 | H | -0.76468 | -0.69882 | -6.47537 |
| 75 | H | -1.94113 | -0.40965 | -5.08704 |
| 76 | H | 2.237417 | 0.849983 | -4.85065 |
| 77 | H | 1.529474 | 0.216297 | -6.34047 |
| 78 | H | 1.962314 | -0.88994 | -5.02506 |

## S19. Coordinates of 2 used for NMR calculations

All conformers with population > 5% at 300K are listed. The structure refers to the lowest energy conformer.

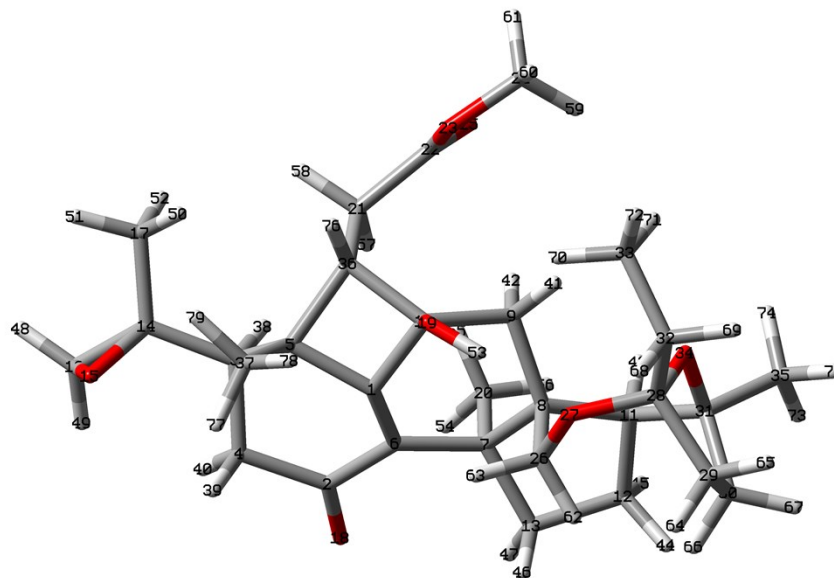

Conformer 1, DFT energy -1695.11999 au ( $\omega$ B97X-V/6-311+G(2df,2p))

| Tag | Symbol | X        | Y        | Z        |
|-----|--------|----------|----------|----------|
| 1   | C      | 0.654441 | 0.850405 | 1.218534 |
| 2   | C      | 0.597875 | -0.03118 | 3.450298 |
| 3   | C      | -0.08255 | 2.402005 | 3.039167 |
| 4   | C      | 0.700898 | 1.416705 | 3.927711 |
| 5   | C      | 0.483027 | 2.295318 | 1.600155 |
| 6   | C      | 0.518221 | -0.23743 | 1.989176 |
| 7   | C      | -0.03876 | -1.50471 | 1.372197 |
| 8   | C      | 0.158294 | -1.47792 | -0.18206 |
| 9   | C      | -0.52241 | -0.21123 | -0.75899 |
| 10  | C      | 0.215068 | 1.031412 | -0.22091 |
| 11  | C      | -0.42085 | -2.85947 | -0.59151 |
| 12  | C      | -0.11473 | -3.78927 | 0.628867 |
| 13  | C      | 0.507433 | -2.89485 | 1.732563 |
| 14  | C      | -0.1204  | 3.829456 | 3.579454 |
| 15  | O      | 1.114358 | 4.351052 | 4.074552 |
| 16  | C      | 0.063762 | 4.130065 | 5.006476 |
| 17  | C      | -0.94256 | 4.811783 | 2.77107  |
| 18  | O      | 0.563445 | -0.95088 | 4.249876 |
| 19  | O      | 1.224461 | 1.472356 | -1.10833 |
| 20  | C      | -1.53719 | -1.50223 | 1.792468 |
| 21  | C      | -1.96946 | 2.274567 | 0.545958 |

|    |   |          |          |          |
|----|---|----------|----------|----------|
| 22 | C | -2.7635  | 1.927381 | -0.69697 |
| 23 | O | -2.15041 | 2.341703 | -1.81411 |
| 24 | C | -2.76423 | 1.948763 | -3.03883 |
| 25 | O | -3.81875 | 1.338401 | -0.69062 |
| 26 | C | 1.670316 | -1.45549 | -0.53919 |
| 27 | O | 1.920601 | -1.04188 | -1.87966 |
| 28 | C | 1.532982 | -1.90207 | -2.95065 |
| 29 | C | 2.30177  | -3.2285  | -2.88811 |
| 30 | C | 1.401509 | -4.1374  | -2.04076 |
| 31 | C | 0.028134 | -3.39989 | -1.98029 |
| 32 | C | 1.736195 | -1.09461 | -4.22741 |
| 33 | C | 0.783848 | 0.09116  | -4.3755  |
| 34 | O | 0.185584 | -2.28052 | -2.87    |
| 35 | C | -1.07869 | -4.26785 | -2.56879 |
| 36 | C | -0.46785 | 2.345359 | 0.317209 |
| 37 | C | 1.740533 | 3.149716 | 1.38785  |
| 38 | H | -1.12542 | 2.055688 | 3.023335 |
| 39 | H | 1.757302 | 1.708483 | 3.968789 |
| 40 | H | 0.331488 | 1.41018  | 4.95502  |
| 41 | H | -0.51186 | -0.20822 | -1.84856 |
| 42 | H | -1.57272 | -0.22161 | -0.45827 |
| 43 | H | -1.50662 | -2.7354  | -0.67117 |
| 44 | H | 0.544322 | -4.62155 | 0.372223 |
| 45 | H | -1.03949 | -4.24779 | 0.990675 |
| 46 | H | 1.60169  | -2.91398 | 1.697322 |
| 47 | H | 0.219774 | -3.20122 | 2.74008  |
| 48 | H | -0.39195 | 5.032898 | 5.413808 |
| 49 | H | 0.242791 | 3.343808 | 5.735743 |
| 50 | H | -0.65152 | 4.812781 | 1.715874 |
| 51 | H | -0.80338 | 5.823571 | 3.160488 |
| 52 | H | -2.00684 | 4.559215 | 2.83339  |
| 53 | H | 1.606336 | 0.690069 | -1.54495 |
| 54 | H | -1.58594 | -1.57999 | 2.881713 |
| 55 | H | -2.05569 | -0.58761 | 1.500605 |
| 56 | H | -2.09855 | -2.34231 | 1.379123 |
| 57 | H | -2.24932 | 1.530028 | 1.295563 |
| 58 | H | -2.34068 | 3.237375 | 0.915751 |
| 59 | H | -2.88326 | 0.862121 | -3.06909 |
| 60 | H | -2.08668 | 2.279716 | -3.82501 |
| 61 | H | -3.74456 | 2.420375 | -3.14946 |
| 62 | H | 2.14154  | -2.42411 | -0.35455 |
| 63 | H | 2.211235 | -0.73197 | 0.072405 |
| 64 | H | 3.301653 | -3.08767 | -2.4713  |
| 65 | H | 2.410982 | -3.62331 | -3.90154 |



|    |   |          |          |          |
|----|---|----------|----------|----------|
| 66 | H | 1.832206 | -4.31084 | -1.05465 |
| 67 | H | 1.277758 | -5.12131 | -2.50059 |
| 68 | H | 2.778324 | -0.75967 | -4.24636 |
| 69 | H | 1.597831 | -1.77819 | -5.07088 |
| 70 | H | 0.890139 | 0.812058 | -3.56033 |
| 71 | H | -0.25401 | -0.256   | -4.38979 |
| 72 | H | 0.980582 | 0.615488 | -5.31571 |
| 73 | H | -1.28382 | -5.11877 | -1.90946 |
| 74 | H | -1.99998 | -3.68819 | -2.68303 |
| 75 | H | -0.78497 | -4.64891 | -3.55207 |
| 76 | H | -0.22671 | 3.178957 | -0.34704 |
| 77 | H | 2.478816 | 2.957437 | 2.171667 |
| 78 | H | 2.186786 | 2.921276 | 0.419152 |
| 79 | H | 1.501994 | 4.216874 | 1.420223 |

Conformer 2, DFT energy -1695.11979 au ( $\omega$ B97X-V/6-311+G(2df,2p))

| Tag | Symbol | X        | Y        | Z        |
|-----|--------|----------|----------|----------|
| 1   | C      | 0.670715 | 0.61998  | 0.866209 |
| 2   | C      | 0.631906 | -0.22787 | 3.117964 |
| 3   | C      | -0.07039 | 2.170703 | 2.6445   |
| 4   | C      | 0.745496 | 1.231287 | 3.557696 |
| 5   | C      | 0.52825  | 2.078675 | 1.220528 |
| 6   | C      | 0.520232 | -0.45079 | 1.658934 |
| 7   | C      | -0.08706 | -1.70994 | 1.073597 |
| 8   | C      | 0.094557 | -1.72104 | -0.48229 |
| 9   | C      | -0.5516  | -0.44524 | -1.08356 |
| 10  | C      | 0.227818 | 0.784272 | -0.57621 |
| 11  | C      | -0.52949 | -3.09274 | -0.86104 |
| 12  | C      | -0.26688 | -4.00334 | 0.383962 |
| 13  | C      | 0.406691 | -3.11308 | 1.459407 |
| 14  | C      | -0.27285 | 3.535268 | 3.308509 |
| 15  | O      | -0.17855 | 4.6972   | 2.48015  |
| 16  | C      | 0.814006 | 4.506074 | 3.487476 |
| 17  | C      | -1.42161 | 3.570154 | 4.294048 |
| 18  | O      | 0.6106   | -1.13619 | 3.929961 |
| 19  | O      | 1.245562 | 1.169827 | -1.48201 |
| 20  | C      | -1.57964 | -1.63981 | 1.508245 |
| 21  | C      | -1.92083 | 2.115583 | 0.122695 |
| 22  | C      | -2.47989 | 3.403999 | 0.683494 |
| 23  | O      | -2.06861 | 4.466054 | -0.01265 |
| 24  | C      | -2.48011 | 5.735649 | 0.499379 |
| 25  | O      | -3.22854 | 3.470056 | 1.632426 |
| 26  | C      | 1.606943 | -1.75193 | -0.83889 |

|    |   |          |          |          |
|----|---|----------|----------|----------|
| 27 | O | 1.87734  | -1.38526 | -2.18772 |
| 28 | C | 1.481272 | -2.2756  | -3.2294  |
| 29 | C | 2.205945 | -3.62255 | -3.10243 |
| 30 | C | 1.259782 | -4.47653 | -2.24862 |
| 31 | C | -0.08652 | -3.68846 | -2.23002 |
| 32 | C | 1.735883 | -1.5313  | -4.5344  |
| 33 | C | 0.84601  | -0.30679 | -4.74079 |
| 34 | O | 0.120212 | -2.60529 | -3.15307 |
| 35 | C | -1.21754 | -4.53499 | -2.80311 |
| 36 | C | -0.41157 | 2.13102  | -0.06856 |
| 37 | C | 1.802171 | 2.89528  | 0.971792 |
| 38 | H | -1.07638 | 1.734173 | 2.581953 |
| 39 | H | 1.80392  | 1.523139 | 3.551733 |
| 40 | H | 0.410758 | 1.275584 | 4.597342 |
| 41 | H | -0.54405 | -0.46909 | -2.17368 |
| 42 | H | -1.60095 | -0.40429 | -0.7784  |
| 43 | H | -1.60967 | -2.93345 | -0.95481 |
| 44 | H | 0.343951 | -4.87771 | 0.148429 |
| 45 | H | -1.21308 | -4.40073 | 0.762602 |
| 46 | H | 1.498495 | -3.17978 | 1.41257  |
| 47 | H | 0.119837 | -3.38406 | 2.477093 |
| 48 | H | 0.761896 | 5.204773 | 4.322095 |
| 49 | H | 1.816833 | 4.302177 | 3.12191  |
| 50 | H | -1.27248 | 2.832678 | 5.090424 |
| 51 | H | -2.36029 | 3.347901 | 3.780054 |
| 52 | H | -1.50239 | 4.559933 | 4.752213 |
| 53 | H | 1.604856 | 0.364961 | -1.89665 |
| 54 | H | -1.62509 | -1.73231 | 2.597255 |
| 55 | H | -2.04581 | -0.69013 | 1.239962 |
| 56 | H | -2.1884  | -2.44176 | 1.083266 |
| 57 | H | -2.38573 | 1.949519 | -0.85743 |
| 58 | H | -2.25736 | 1.313261 | 0.782924 |
| 59 | H | -3.56925 | 5.789788 | 0.55991  |
| 60 | H | -2.09804 | 6.470658 | -0.20799 |
| 61 | H | -2.04176 | 5.888603 | 1.48746  |
| 62 | H | 2.046559 | -2.72892 | -0.62407 |
| 63 | H | 2.166062 | -1.02894 | -0.24346 |
| 64 | H | 3.199928 | -3.49714 | -2.6661  |
| 65 | H | 2.328996 | -4.05362 | -4.09968 |
| 66 | H | 1.667689 | -4.64059 | -1.25108 |
| 67 | H | 1.107754 | -5.46652 | -2.68708 |
| 68 | H | 2.794158 | -1.24797 | -4.55354 |
| 69 | H | 1.574115 | -2.24255 | -5.35141 |
| 70 | H | 0.982389 | 0.439058 | -3.95354 |

|    |   |          |          |          |
|----|---|----------|----------|----------|
| 71 | H | -0.2079  | -0.59927 | -4.75207 |
| 72 | H | 1.077318 | 0.1702   | -5.69803 |
| 73 | H | -1.46042 | -5.35646 | -2.11998 |
| 74 | H | -2.11537 | -3.92629 | -2.94717 |
| 75 | H | -0.92754 | -4.95746 | -3.77013 |
| 76 | H | -0.13738 | 2.950728 | -0.73604 |
| 77 | H | 2.551627 | 2.711668 | 1.750082 |
| 78 | H | 2.23992  | 2.607627 | 0.014716 |
| 79 | H | 1.562581 | 3.96028  | 0.942132 |

Conformer 3, DFT energy -1695.11950 au ( $\omega$ B97X-V/6-311+G(2df,2p))

| Tag | Symbol | X        | Y        | Z        |
|-----|--------|----------|----------|----------|
| 1   | C      | 0.552143 | 0.857504 | -0.66781 |
| 2   | C      | 0.531734 | 3.117598 | 0.160271 |
| 3   | C      | -0.18865 | 2.628634 | -2.22865 |
| 4   | C      | 0.64051  | 3.5441   | -1.30317 |
| 5   | C      | 0.399402 | 1.200968 | -2.12781 |
| 6   | C      | 0.413324 | 1.661476 | 0.396708 |
| 7   | C      | -0.18441 | 1.090928 | 1.667312 |
| 8   | C      | -0.00808 | -0.46501 | 1.688675 |
| 9   | C      | -0.67079 | -1.07459 | 0.425221 |
| 10  | C      | 0.09824  | -0.58454 | -0.81722 |
| 11  | C      | -0.62007 | -0.83213 | 3.067838 |
| 12  | C      | -0.33475 | 0.414827 | 3.968896 |
| 13  | C      | 0.326355 | 1.485272 | 3.062258 |
| 14  | C      | -0.39528 | 3.281502 | -3.59797 |
| 15  | O      | -0.31461 | 2.441691 | -4.75278 |
| 16  | C      | 0.686627 | 3.443524 | -4.57739 |
| 17  | C      | -1.53754 | 4.274664 | -3.63496 |
| 18  | O      | 0.520033 | 3.937267 | 1.06154  |
| 19  | O      | 1.098176 | -1.50646 | -1.20412 |
| 20  | C      | -1.67528 | 1.532127 | 1.61062  |
| 21  | C      | -2.05855 | 0.123284 | -2.13225 |
| 22  | C      | -2.62573 | 0.67901  | -3.41919 |
| 23  | O      | -2.22806 | -0.02668 | -4.4802  |
| 24  | C      | -2.6459  | 0.480173 | -5.74957 |
| 25  | O      | -3.36859 | 1.632499 | -3.48492 |
| 26  | C      | 1.505152 | -0.82222 | 1.709766 |
| 27  | O      | 1.77146  | -2.17292 | 1.351099 |
| 28  | C      | 1.371322 | -3.21262 | 2.239289 |
| 29  | C      | 2.096368 | -3.10579 | 3.586482 |
| 30  | C      | 1.164228 | -2.23726 | 4.440666 |
| 31  | C      | -0.18504 | -2.20621 | 3.658651 |

|    |   |          |          |          |
|----|---|----------|----------|----------|
| 32 | C | 1.591631 | -4.5073  | 1.470557 |
| 33 | C | 3.049706 | -4.75431 | 1.092614 |
| 34 | O | 0.011267 | -3.12766 | 2.570702 |
| 35 | C | -1.31647 | -2.77406 | 4.508037 |
| 36 | C | -0.55126 | -0.08023 | -2.16097 |
| 37 | C | 1.664851 | 0.932647 | -2.95161 |
| 38 | H | -1.19197 | 2.577914 | -1.78462 |
| 39 | H | 1.697485 | 3.526331 | -1.60135 |
| 40 | H | 0.314029 | 4.586432 | -1.35501 |
| 41 | H | -0.66786 | -2.16495 | 0.459789 |
| 42 | H | -1.71948 | -0.76582 | 0.394092 |
| 43 | H | -1.70291 | -0.91427 | 2.920961 |
| 44 | H | 0.292299 | 0.179996 | 4.831851 |
| 45 | H | -1.27173 | 0.798317 | 4.383139 |
| 46 | H | 1.418904 | 1.440811 | 3.115757 |
| 47 | H | 0.041427 | 2.504228 | 3.330567 |
| 48 | H | 0.636096 | 4.271931 | -5.28355 |
| 49 | H | 1.687908 | 3.072172 | -4.37669 |
| 50 | H | -2.47855 | 3.769765 | -3.40051 |
| 51 | H | -1.6223  | 4.722099 | -4.62905 |
| 52 | H | -1.37769 | 5.078079 | -2.9071  |
| 53 | H | 1.435663 | -1.94263 | -0.40137 |
| 54 | H | -1.714   | 2.622231 | 1.688658 |
| 55 | H | -2.15588 | 1.253345 | 0.671515 |
| 56 | H | -2.27504 | 1.121939 | 2.42652  |
| 57 | H | -2.52959 | -0.85191 | -1.95465 |
| 58 | H | -2.38208 | 0.791517 | -1.33122 |
| 59 | H | -3.73535 | 0.547165 | -5.79611 |
| 60 | H | -2.27379 | -0.23412 | -6.48315 |
| 61 | H | -2.20342 | 1.464483 | -5.91148 |
| 62 | H | 1.952413 | -0.60192 | 2.682222 |
| 63 | H | 2.058825 | -0.23431 | 0.976873 |
| 64 | H | 3.099513 | -2.68896 | 3.469439 |
| 65 | H | 2.196216 | -4.1091  | 4.011099 |
| 66 | H | 1.585413 | -1.24387 | 4.596001 |
| 67 | H | 1.012651 | -2.66774 | 5.434203 |
| 68 | H | 1.208434 | -5.32402 | 2.09084  |
| 69 | H | 0.967443 | -4.46535 | 0.570702 |
| 70 | H | 3.685289 | -4.83507 | 1.981639 |
| 71 | H | 3.436739 | -3.94059 | 0.473185 |
| 72 | H | 3.145686 | -5.68752 | 0.529577 |
| 73 | H | -1.55194 | -2.09072 | 5.331558 |
| 74 | H | -2.21742 | -2.91132 | 3.902327 |
| 75 | H | -1.03106 | -3.74374 | 4.927783 |

|    |   |          |          |          |
|----|---|----------|----------|----------|
| 76 | H | -0.29006 | -0.75577 | -2.97826 |
| 77 | H | 2.421944 | 1.706746 | -2.78205 |
| 78 | H | 2.096963 | -0.02472 | -2.65623 |
| 79 | H | 1.417287 | 0.893216 | -4.0145  |

Conformer 4, DFT energy -1695.11939 au ( $\omega$ B97X-V/6-311+G(2df,2p))

| Tag | Symbol | X        | Y        | Z        |
|-----|--------|----------|----------|----------|
| 1   | C      | -0.68869 | -0.86991 | 1.185208 |
| 2   | C      | -0.5028  | 0.03267  | 3.400796 |
| 3   | C      | 0.072834 | -2.42869 | 2.990415 |
| 4   | C      | -0.63526 | -1.4061  | 3.899909 |
| 5   | C      | -0.54682 | -2.31611 | 1.573616 |
| 6   | C      | -0.48275 | 0.220901 | 1.936126 |
| 7   | C      | 0.073278 | 1.467117 | 1.276245 |
| 8   | C      | -0.20881 | 1.428023 | -0.26476 |
| 9   | C      | 0.411948 | 0.140308 | -0.86516 |
| 10  | C      | -0.3213  | -1.07915 | -0.27057 |
| 11  | C      | 0.37357  | 2.793097 | -0.72286 |
| 12  | C      | 0.166021 | 3.740803 | 0.504822 |
| 13  | C      | -0.41899 | 2.874186 | 1.650102 |
| 14  | C      | 0.082409 | -3.85102 | 3.545506 |
| 15  | O      | -1.15174 | -4.32756 | 4.085232 |
| 16  | C      | -0.06549 | -4.13085 | 4.981037 |
| 17  | C      | 0.846639 | -4.86843 | 2.72293  |
| 18  | O      | -0.40023 | 0.958676 | 4.187201 |
| 19  | O      | -1.38025 | -1.51188 | -1.10079 |
| 20  | C      | 1.591453 | 1.43732  | 1.615615 |
| 21  | C      | 1.864386 | -2.33173 | 0.462594 |
| 22  | C      | 2.586273 | -2.2021  | -0.86003 |
| 23  | O      | 3.600618 | -1.32205 | -0.77874 |
| 24  | C      | 4.318775 | -1.11415 | -1.99474 |
| 25  | O      | 2.303916 | -2.80187 | -1.86837 |
| 26  | C      | -1.74022 | 1.434219 | -0.53093 |
| 27  | O      | -2.08279 | 1.016342 | -1.84803 |
| 28  | C      | -1.75494 | 1.869293 | -2.94332 |
| 29  | C      | -2.48724 | 3.213307 | -2.82736 |
| 30  | C      | -1.50549 | 4.108292 | -2.0597  |
| 31  | C      | -0.15124 | 3.3342   | -2.0854  |
| 32  | C      | -2.07107 | 1.071855 | -4.20278 |
| 33  | C      | -1.17423 | -0.14654 | -4.41581 |
| 34  | O      | -0.39576 | 2.2159   | -2.95538 |
| 35  | C      | 0.937092 | 4.168439 | -2.75222 |
| 36  | C      | 0.358949 | -2.3989  | 0.261429 |

|    |   |          |          |          |
|----|---|----------|----------|----------|
| 37 | C | -1.83573 | -3.13507 | 1.418208 |
| 38 | H | 1.126158 | -2.12123 | 2.927793 |
| 39 | H | -1.699   | -1.65955 | 3.991298 |
| 40 | H | -0.21979 | -1.40223 | 4.909982 |
| 41 | H | 0.337391 | 0.124198 | -1.95258 |
| 42 | H | 1.477734 | 0.125604 | -0.6251  |
| 43 | H | 1.449472 | 2.64428  | -0.86989 |
| 44 | H | -0.48023 | 4.591842 | 0.278745 |
| 45 | H | 1.123259 | 4.173223 | 0.81002  |
| 46 | H | -1.51263 | 2.921991 | 1.673878 |
| 47 | H | -0.06978 | 3.18235  | 2.63745  |
| 48 | H | 0.375619 | -5.04336 | 5.383478 |
| 49 | H | -0.19721 | -3.33173 | 5.706684 |
| 50 | H | 0.526696 | -4.86903 | 1.676373 |
| 51 | H | 0.686086 | -5.8717  | 3.125843 |
| 52 | H | 1.920344 | -4.65189 | 2.752928 |
| 53 | H | -1.77178 | -0.72739 | -1.52496 |
| 54 | H | 1.701096 | 1.518731 | 2.700329 |
| 55 | H | 2.076811 | 0.513293 | 1.299238 |
| 56 | H | 2.144585 | 2.265775 | 1.167832 |
| 57 | H | 2.160786 | -1.50704 | 1.114597 |
| 58 | H | 2.217898 | -3.25503 | 0.935205 |
| 59 | H | 4.760061 | -2.04913 | -2.34625 |
| 60 | H | 5.096078 | -0.38937 | -1.75464 |
| 61 | H | 3.652786 | -0.72309 | -2.76789 |
| 62 | H | -2.17632 | 2.415349 | -0.32649 |
| 63 | H | -2.25669 | 0.728385 | 0.121034 |
| 64 | H | -3.45445 | 3.095086 | -2.33266 |
| 65 | H | -2.66915 | 3.604936 | -3.83191 |
| 66 | H | -1.86084 | 4.307586 | -1.04851 |
| 67 | H | -1.38841 | 5.082115 | -2.5432  |
| 68 | H | -3.12408 | 0.773262 | -4.15058 |
| 69 | H | -1.96795 | 1.754104 | -5.0535  |
| 70 | H | -1.25445 | -0.86837 | -3.59945 |
| 71 | H | -0.12721 | 0.158981 | -4.49427 |
| 72 | H | -1.44922 | -0.65927 | -5.34265 |
| 73 | H | 1.208889 | 5.018144 | -2.11551 |
| 74 | H | 1.83226  | 3.562382 | -2.92325 |
| 75 | H | 0.589115 | 4.550749 | -3.71711 |
| 76 | H | 0.10511  | -3.24098 | -0.38811 |
| 77 | H | -2.539   | -2.90921 | 2.224913 |
| 78 | H | -2.30897 | -2.90762 | 0.462298 |
| 79 | H | -1.6274  | -4.20798 | 1.458531 |

Conformer 5, DFT energy -1695.11925 au ( $\omega$ B97X-V/6-311+G(2df,2p))

| Tag | Symbol | X        | Y        | Z        |
|-----|--------|----------|----------|----------|
| 1   | C      | 0.753846 | -0.63807 | 1.216439 |
| 2   | C      | -0.14155 | -0.50966 | 3.439103 |
| 3   | C      | 2.316312 | 0.093426 | 3.032798 |
| 4   | C      | 1.299758 | -0.63733 | 3.930928 |
| 5   | C      | 2.199622 | -0.49707 | 1.604443 |
| 6   | C      | -0.33496 | -0.4558  | 1.975701 |
| 7   | C      | -1.58726 | 0.108162 | 1.334924 |
| 8   | C      | -1.55145 | -0.13608 | -0.21167 |
| 9   | C      | -0.27164 | 0.50941  | -0.80072 |
| 10  | C      | 0.954932 | -0.23148 | -0.23074 |
| 11  | C      | -2.92139 | 0.448806 | -0.65189 |
| 12  | C      | -3.86371 | 0.207949 | 0.574167 |
| 13  | C      | -2.99026 | -0.40097 | 1.701836 |
| 14  | C      | 3.740397 | 0.090055 | 3.58514  |
| 15  | O      | 4.215753 | -1.15695 | 4.097096 |
| 16  | C      | 4.021717 | -0.08915 | 5.016742 |
| 17  | C      | 4.759461 | 0.86941  | 2.778342 |
| 18  | O      | -1.06556 | -0.43774 | 4.231168 |
| 19  | O      | 1.392602 | -1.26374 | -1.09523 |
| 20  | C      | -1.56233 | 1.617842 | 1.709745 |
| 21  | C      | 2.233208 | 1.940746 | 0.543978 |
| 22  | C      | 2.146948 | 2.72581  | -0.74575 |
| 23  | O      | 3.183526 | 2.450851 | -1.55087 |
| 24  | C      | 3.162157 | 3.097618 | -2.82302 |
| 25  | O      | 1.269075 | 3.505935 | -1.03228 |
| 26  | C      | -1.552   | -1.66115 | -0.51171 |
| 27  | O      | -1.13491 | -1.97554 | -1.8368  |
| 28  | C      | -1.99356 | -1.62772 | -2.92213 |
| 29  | C      | -3.33339 | -2.37001 | -2.81818 |
| 30  | C      | -4.22977 | -1.41086 | -2.02338 |
| 31  | C      | -3.46413 | -0.05109 | -2.02311 |
| 32  | C      | -1.19768 | -1.91077 | -4.19065 |
| 33  | C      | 0.007911 | -0.99283 | -4.38881 |
| 34  | O      | -2.34719 | -0.27149 | -2.90266 |
| 35  | C      | -4.30611 | 1.045885 | -2.66498 |
| 36  | C      | 2.279242 | 0.435707 | 0.310719 |
| 37  | C      | 3.021544 | -1.78001 | 1.417099 |
| 38  | H      | 2.007199 | 1.147393 | 2.99315  |
| 39  | H      | 1.562822 | -1.69963 | 4.00468  |
| 40  | H      | 1.294366 | -0.23914 | 4.947462 |

|    |   |          |          |          |
|----|---|----------|----------|----------|
| 41 | H | -0.26392 | 0.457379 | -1.88941 |
| 42 | H | -0.25812 | 1.570292 | -0.54389 |
| 43 | H | -2.7793  | 1.52782  | -0.77688 |
| 44 | H | -4.71326 | -0.43581 | 0.335706 |
| 45 | H | -4.29795 | 1.155878 | 0.90425  |
| 46 | H | -3.03199 | -1.49503 | 1.698097 |
| 47 | H | -3.29672 | -0.07807 | 2.69843  |
| 48 | H | 4.93594  | 0.340752 | 5.427135 |
| 49 | H | 3.223216 | -0.23569 | 5.739926 |
| 50 | H | 4.757861 | 0.573166 | 1.725181 |
| 51 | H | 5.762613 | 0.6963   | 3.176051 |
| 52 | H | 4.547032 | 1.942749 | 2.833158 |
| 53 | H | 0.60832  | -1.66183 | -1.51286 |
| 54 | H | -1.64412 | 1.702497 | 2.796855 |
| 55 | H | -0.63925 | 2.111416 | 1.403584 |
| 56 | H | -2.39145 | 2.178997 | 1.273286 |
| 57 | H | 1.380679 | 2.237244 | 1.157731 |
| 58 | H | 3.143997 | 2.254632 | 1.06414  |
| 59 | H | 2.305999 | 2.753382 | -3.40825 |
| 60 | H | 4.094634 | 2.816096 | -3.30979 |
| 61 | H | 3.099726 | 4.181515 | -2.70399 |
| 62 | H | -2.53156 | -2.10408 | -0.31644 |
| 63 | H | -0.84517 | -2.19111 | 0.128062 |
| 64 | H | -3.20791 | -3.34809 | -2.34705 |
| 65 | H | -3.72822 | -2.52984 | -3.82523 |
| 66 | H | -4.42012 | -1.78979 | -1.01924 |
| 67 | H | -5.20701 | -1.28872 | -2.49846 |
| 68 | H | -0.88517 | -2.96038 | -4.15902 |
| 69 | H | -1.88391 | -1.79999 | -5.03702 |
| 70 | H | 0.728226 | -1.07803 | -3.57196 |
| 71 | H | -0.31551 | 0.050209 | -4.44891 |
| 72 | H | 0.524529 | -1.24491 | -5.31967 |
| 73 | H | -5.15385 | 1.300917 | -2.01922 |
| 74 | H | -3.70462 | 1.946464 | -2.82005 |
| 75 | H | -4.69148 | 0.714894 | -3.63442 |
| 76 | H | 3.120622 | 0.18261  | -0.33947 |
| 77 | H | 2.798704 | -2.50232 | 2.207308 |
| 78 | H | 2.790777 | -2.2309  | 0.451394 |
| 79 | H | 4.094183 | -1.57135 | 1.45988  |

Conformer 6, DFT energy -1695.11923 au ( $\omega$ B97X-V/6-311+G(2df,2p))

| Tag | Symbol | X        | Y        | Z        |
|-----|--------|----------|----------|----------|
| 1   | C      | 0.520359 | 0.885266 | 1.200356 |



|    |   |          |          |          |
|----|---|----------|----------|----------|
| 2  | C | 0.465673 | 0.014959 | 3.437028 |
| 3  | C | -0.19349 | 2.45088  | 3.020252 |
| 4  | C | 0.590411 | 1.4643   | 3.906615 |
| 5  | C | 0.355025 | 2.332224 | 1.575296 |
| 6  | C | 0.377339 | -0.19715 | 1.977839 |
| 7  | C | -0.17725 | -1.46776 | 1.365168 |
| 8  | C | 0.039728 | -1.44773 | -0.18623 |
| 9  | C | -0.64467 | -0.19018 | -0.77918 |
| 10 | C | 0.076688 | 1.060784 | -0.23971 |
| 11 | C | -0.52665 | -2.8321  | -0.60001 |
| 12 | C | -0.23506 | -3.75651 | 0.628238 |
| 13 | C | 0.366497 | -2.85588 | 1.739001 |
| 14 | C | -0.21855 | 3.881614 | 3.551906 |
| 15 | O | 1.024749 | 4.404696 | 4.023016 |
| 16 | C | -0.0102  | 4.189708 | 4.974318 |
| 17 | C | -1.0526  | 4.859443 | 2.749583 |
| 18 | O | 0.424825 | -0.9005  | 4.241181 |
| 19 | O | 1.072574 | 1.508447 | -1.13645 |
| 20 | C | -1.6796  | -1.46678 | 1.76841  |
| 21 | C | -2.1098  | 2.279212 | 0.574837 |
| 22 | C | -2.93772 | 1.919313 | -0.63999 |
| 23 | O | -2.42588 | 2.434172 | -1.76631 |
| 24 | C | -3.09977 | 2.067428 | -2.96852 |
| 25 | O | -3.94257 | 1.247809 | -0.60788 |
| 26 | C | 1.559435 | -1.41966 | -0.51137 |
| 27 | O | 1.839904 | -1.01505 | -1.8464  |
| 28 | C | 1.477929 | -1.87921 | -2.92013 |
| 29 | C | 2.237147 | -3.20967 | -2.84678 |
| 30 | C | 1.316834 | -4.11359 | -2.01637 |
| 31 | C | -0.05403 | -3.37037 | -1.98267 |
| 32 | C | 1.695734 | -1.06154 | -4.18499 |
| 33 | C | 3.146021 | -0.63458 | -4.39629 |
| 34 | O | 0.12651  | -2.24972 | -2.8685  |
| 35 | C | -1.15289 | -4.23156 | -2.5949  |
| 36 | C | -0.61546 | 2.36867  | 0.305394 |
| 37 | C | 1.610191 | 3.183855 | 1.3399   |
| 38 | H | -1.23842 | 2.11173  | 3.019165 |
| 39 | H | 1.650756 | 1.745204 | 3.934846 |
| 40 | H | 0.230915 | 1.467861 | 4.937915 |
| 41 | H | -0.61605 | -0.19093 | -1.86936 |
| 42 | H | -1.69976 | -0.21023 | -0.49642 |
| 43 | H | -1.6117  | -2.71285 | -0.69473 |
| 44 | H | 0.431136 | -4.58715 | 0.385456 |
| 45 | H | -1.16343 | -4.21755 | 0.977227 |

|    |   |          |          |          |
|----|---|----------|----------|----------|
| 46 | H | 1.461081 | -2.87328 | 1.723441 |
| 47 | H | 0.062223 | -3.1595  | 2.742361 |
| 48 | H | -0.46073 | 5.093959 | 5.383946 |
| 49 | H | 0.182042 | 3.407519 | 5.704409 |
| 50 | H | -0.7701  | 4.860322 | 1.691994 |
| 51 | H | -0.91753 | 5.873159 | 3.136193 |
| 52 | H | -2.11479 | 4.59973  | 2.820861 |
| 53 | H | 1.446505 | 0.728112 | -1.58375 |
| 54 | H | -1.74045 | -1.52717 | 2.858851 |
| 55 | H | -2.20336 | -0.56234 | 1.454192 |
| 56 | H | -2.22947 | -2.31909 | 1.362139 |
| 57 | H | -2.3554  | 1.534355 | 1.335515 |
| 58 | H | -2.47839 | 3.240909 | 0.950784 |
| 59 | H | -3.06739 | 0.982786 | -3.10231 |
| 60 | H | -2.55853 | 2.566264 | -3.77106 |
| 61 | H | -4.14237 | 2.394067 | -2.94379 |
| 62 | H | 2.02922  | -2.38558 | -0.30907 |
| 63 | H | 2.081872 | -0.68902 | 0.107091 |
| 64 | H | 3.232204 | -3.08059 | -2.4144  |
| 65 | H | 2.35837  | -3.60015 | -3.86154 |
| 66 | H | 1.728608 | -4.28578 | -1.02188 |
| 67 | H | 1.198742 | -5.09836 | -2.47659 |
| 68 | H | 1.342267 | -1.6641  | -5.02815 |
| 69 | H | 1.045849 | -0.18133 | -4.12186 |
| 70 | H | 3.808267 | -1.50174 | -4.49297 |
| 71 | H | 3.50156  | -0.02974 | -3.55823 |
| 72 | H | 3.24039  | -0.04125 | -5.30992 |
| 73 | H | -1.37671 | -5.08204 | -1.9413  |
| 74 | H | -2.06795 | -3.64634 | -2.72744 |
| 75 | H | -0.84117 | -4.61315 | -3.57223 |
| 76 | H | -0.39932 | 3.204294 | -0.36484 |
| 77 | H | 2.358442 | 2.996864 | 2.11558  |
| 78 | H | 2.042467 | 2.947488 | 0.366717 |
| 79 | H | 1.372725 | 4.251413 | 1.367498 |

Conformer 7, DFT energy -1695.11902 au ( $\omega$ B97X-V/6-311+G(2df,2p))

| Tag | Symbol | X        | Y        | Z        |
|-----|--------|----------|----------|----------|
| 1   | C      | -0.88994 | 0.618546 | 1.167278 |
| 2   | C      | 0.027392 | 0.487938 | 3.38093  |
| 3   | C      | -2.44396 | -0.06389 | 3.008572 |
| 4   | C      | -1.40483 | 0.660958 | 3.885403 |
| 5   | C      | -2.33476 | 0.507151 | 1.571313 |
| 6   | C      | 0.20286  | 0.417217 | 1.916585 |

|    |   |          |          |          |
|----|---|----------|----------|----------|
| 7  | C | 1.437576 | -0.17332 | 1.26497  |
| 8  | C | 1.388907 | 0.06667  | -0.28228 |
| 9  | C | 0.089949 | -0.55532 | -0.85609 |
| 10 | C | -1.11657 | 0.209579 | -0.27631 |
| 11 | C | 2.740988 | -0.54557 | -0.73656 |
| 12 | C | 3.704258 | -0.30751 | 0.47341  |
| 13 | C | 2.853752 | 0.312943 | 1.61315  |
| 14 | C | -3.86179 | -0.03705 | 3.574125 |
| 15 | O | -4.31947 | 1.220254 | 4.076199 |
| 16 | C | -4.12795 | 0.161309 | 5.006305 |
| 17 | C | -4.89381 | -0.81539 | 2.783342 |
| 18 | O | 0.958539 | 0.397799 | 4.163374 |
| 19 | O | -1.54151 | 1.241551 | -1.14111 |
| 20 | C | 1.394516 | -1.68061 | 1.647069 |
| 21 | C | -2.38848 | -1.93755 | 0.539103 |
| 22 | C | -2.26121 | -2.70373 | -0.75852 |
| 23 | O | -1.40976 | -3.73817 | -0.63366 |
| 24 | C | -1.20147 | -4.49842 | -1.82391 |
| 25 | O | -2.8395  | -2.4377  | -1.78359 |
| 26 | C | 1.41472  | 1.591571 | -0.58507 |
| 27 | O | 0.989902 | 1.908975 | -1.90522 |
| 28 | C | 1.816615 | 1.534088 | -3.0033  |
| 29 | C | 3.177581 | 2.2393   | -2.94395 |
| 30 | C | 4.064017 | 1.268017 | -2.15369 |
| 31 | C | 3.265998 | -0.07193 | -2.12451 |
| 32 | C | 0.983558 | 1.806598 | -4.24727 |
| 33 | C | 0.608421 | 3.275622 | -4.42245 |
| 34 | O | 2.134749 | 0.168146 | -2.98111 |
| 35 | C | 4.066347 | -1.19473 | -2.7751  |
| 36 | C | -2.43897 | -0.43898 | 0.289385 |
| 37 | C | -3.13837 | 1.800577 | 1.378371 |
| 38 | H | -2.15046 | -1.12256 | 2.979241 |
| 39 | H | -1.64107 | 1.730728 | 3.938992 |
| 40 | H | -1.40002 | 0.28295  | 4.909649 |
| 41 | H | 0.067266 | -0.51066 | -1.94539 |
| 42 | H | 0.066852 | -1.61402 | -0.5868  |
| 43 | H | 2.578737 | -1.62404 | -0.84446 |
| 44 | H | 4.55404  | 0.329658 | 0.219129 |
| 45 | H | 4.137745 | -1.25735 | 0.799327 |
| 46 | H | 2.913067 | 1.406073 | 1.61137  |
| 47 | H | 3.167771 | -0.01662 | 2.605261 |
| 48 | H | -5.04242 | -0.25453 | 5.430471 |
| 49 | H | -3.32144 | 0.308063 | 5.720524 |
| 50 | H | -4.90082 | -0.52467 | 1.728184 |

|    |   |          |          |          |
|----|---|----------|----------|----------|
| 51 | H | -5.89253 | -0.63606 | 3.190375 |
| 52 | H | -4.6846  | -1.88963 | 2.841672 |
| 53 | H | -0.75938 | 1.583622 | -1.60966 |
| 54 | H | 1.466245 | -1.75974 | 2.735487 |
| 55 | H | 0.470192 | -2.16992 | 1.335868 |
| 56 | H | 2.224905 | -2.24998 | 1.222455 |
| 57 | H | -1.56943 | -2.22213 | 1.203265 |
| 58 | H | -3.31674 | -2.2661  | 1.02034  |
| 59 | H | -2.14504 | -4.91018 | -2.18951 |
| 60 | H | -0.51569 | -5.29808 | -1.54572 |
| 61 | H | -0.76276 | -3.8688  | -2.60255 |
| 62 | H | 2.40503  | 2.016128 | -0.40243 |
| 63 | H | 0.722512 | 2.134839 | 0.059099 |
| 64 | H | 3.096097 | 3.228877 | -2.48833 |
| 65 | H | 3.549916 | 2.36801  | -3.96444 |
| 66 | H | 4.27905  | 1.654471 | -1.15754 |
| 67 | H | 5.03048  | 1.11797  | -2.64231 |
| 68 | H | 1.556747 | 1.447792 | -5.10823 |
| 69 | H | 0.080888 | 1.188836 | -4.18036 |
| 70 | H | 1.498888 | 3.90675  | -4.52168 |
| 71 | H | 0.031293 | 3.636907 | -3.56696 |
| 72 | H | 0.00323  | 3.410062 | -5.32405 |
| 73 | H | 4.921899 | -1.46585 | -2.14631 |
| 74 | H | 3.439357 | -2.0814  | -2.9092  |
| 75 | H | 4.437496 | -0.8821  | -3.7561  |
| 76 | H | -3.28257 | -0.1952  | -0.36167 |
| 77 | H | -2.89893 | 2.526918 | 2.160091 |
| 78 | H | -2.9106  | 2.2385   | 0.406107 |
| 79 | H | -4.2135  | 1.607535 | 1.431623 |

Conformer 8, DFT energy -1695.11895 au ( $\omega$ B97X-V/6-311+G(2df,2p))

| Tag | Symbol | X        | Y        | Z        |
|-----|--------|----------|----------|----------|
| 1   | C      | 0.651889 | 0.708099 | 0.912775 |
| 2   | C      | 0.604288 | -0.11724 | 3.173312 |
| 3   | C      | -0.08802 | 2.277768 | 2.676178 |
| 4   | C      | 0.725414 | 1.345529 | 3.598966 |
| 5   | C      | 0.510676 | 2.170051 | 1.253399 |
| 6   | C      | 0.495034 | -0.35412 | 1.716607 |
| 7   | C      | -0.11083 | -1.61946 | 1.142547 |
| 8   | C      | 0.078301 | -1.64408 | -0.41175 |
| 9   | C      | -0.56518 | -0.37438 | -1.02856 |
| 10  | C      | 0.212076 | 0.860498 | -0.53322 |
| 11  | C      | -0.54543 | -3.01669 | -0.78287 |

|    |   |          |          |          |
|----|---|----------|----------|----------|
| 12 | C | -0.27581 | -3.92069 | 0.465234 |
| 13 | C | 0.382507 | -3.01929 | 1.542369 |
| 14 | C | -0.28768 | 3.6495   | 3.326035 |
| 15 | O | -0.19214 | 4.80224  | 2.485    |
| 16 | C | 0.80054  | 4.62062  | 3.493949 |
| 17 | C | -1.43637 | 3.696916 | 4.311331 |
| 18 | O | 0.576141 | -1.01729 | 3.99372  |
| 19 | O | 1.223156 | 1.237227 | -1.44695 |
| 20 | C | -1.60448 | -1.54783 | 1.571669 |
| 21 | C | -1.93792 | 2.196184 | 0.1562   |
| 22 | C | -2.49745 | 3.489117 | 0.705798 |
| 23 | O | -2.08667 | 4.545118 | 0.000232 |
| 24 | C | -2.49669 | 5.819154 | 0.5015   |
| 25 | O | -3.24568 | 3.56326  | 1.654323 |
| 26 | C | 1.594882 | -1.68411 | -0.75424 |
| 27 | O | 1.883174 | -1.32447 | -2.10038 |
| 28 | C | 1.471114 | -2.20008 | -3.14875 |
| 29 | C | 2.182448 | -3.55376 | -3.03812 |
| 30 | C | 1.23288  | -4.4035  | -2.18394 |
| 31 | C | -0.10753 | -3.60624 | -2.15657 |
| 32 | C | 1.718235 | -1.39952 | -4.42295 |
| 33 | C | 1.20066  | -2.06055 | -5.69624 |
| 34 | O | 0.107779 | -2.51281 | -3.06669 |
| 35 | C | -1.24405 | -4.43674 | -2.74152 |
| 36 | C | -0.42886 | 2.210739 | -0.03573 |
| 37 | C | 1.785734 | 2.982055 | 0.99462  |
| 38 | H | -1.09495 | 1.842788 | 2.617812 |
| 39 | H | 1.785679 | 1.633025 | 3.587668 |
| 40 | H | 0.392428 | 1.402287 | 4.639195 |
| 41 | H | -0.55189 | -0.41062 | -2.11872 |
| 42 | H | -1.61636 | -0.33197 | -0.72969 |
| 43 | H | -1.62637 | -2.85947 | -0.87085 |
| 44 | H | 0.348046 | -4.78711 | 0.234728 |
| 45 | H | -1.21841 | -4.3296  | 0.840504 |
| 46 | H | 1.474845 | -3.08341 | 1.509854 |
| 47 | H | 0.084022 | -3.28433 | 2.558284 |
| 48 | H | 0.749733 | 5.328264 | 4.321068 |
| 49 | H | 1.802789 | 4.411347 | 3.130002 |
| 50 | H | -1.2871  | 2.969381 | 5.117141 |
| 51 | H | -2.37569 | 3.468268 | 3.800551 |
| 52 | H | -1.51692 | 4.692484 | 4.756319 |
| 53 | H | 1.571576 | 0.429294 | -1.86541 |
| 54 | H | -1.65276 | -1.62269 | 2.661469 |
| 55 | H | -2.0742  | -0.60524 | 1.286801 |

|    |   |          |          |          |
|----|---|----------|----------|----------|
| 56 | H | -2.20812 | -2.35933 | 1.158915 |
| 57 | H | -2.40324 | 2.021473 | -0.82226 |
| 58 | H | -2.27389 | 1.39931  | 0.823291 |
| 59 | H | -3.58596 | 5.874102 | 0.563674 |
| 60 | H | -2.11588 | 6.547799 | -0.21362 |
| 61 | H | -2.05727 | 5.980573 | 1.487158 |
| 62 | H | 2.025563 | -2.66354 | -0.53137 |
| 63 | H | 2.152076 | -0.96122 | -0.15723 |
| 64 | H | 3.178669 | -3.43704 | -2.60467 |
| 65 | H | 2.299376 | -3.98469 | -4.03541 |
| 66 | H | 1.643408 | -4.57262 | -1.18837 |
| 67 | H | 1.071812 | -5.39118 | -2.62429 |
| 68 | H | 1.229519 | -0.42818 | -4.28549 |
| 69 | H | 2.794132 | -1.20529 | -4.49191 |
| 70 | H | 0.134319 | -2.28357 | -5.60764 |
| 71 | H | 1.726895 | -2.9948  | -5.91982 |
| 72 | H | 1.344072 | -1.39286 | -6.55106 |
| 73 | H | -1.49433 | -5.26513 | -2.06938 |
| 74 | H | -2.1371  | -3.8194  | -2.87897 |
| 75 | H | -0.95525 | -4.84881 | -3.71367 |
| 76 | H | -0.15497 | 3.024932 | -0.71005 |
| 77 | H | 2.535204 | 2.806235 | 1.774751 |
| 78 | H | 2.222505 | 2.682221 | 0.040765 |
| 79 | H | 1.547856 | 4.047095 | 0.952643 |

Conformer 9, DFT energy -1695.11893 au ( $\omega$ B97X-V/6-311+G(2df,2p))

| Tag | Symbol | X        | Y        | Z        |
|-----|--------|----------|----------|----------|
| 1   | C      | 0.802005 | -0.53428 | 1.203467 |
| 2   | C      | -0.09055 | -0.44396 | 3.429711 |
| 3   | C      | 2.368135 | 0.154408 | 3.034739 |
| 4   | C      | 1.350158 | -0.59298 | 3.917166 |
| 5   | C      | 2.248079 | -0.402   | 1.593038 |
| 6   | C      | -0.2853  | -0.36292 | 1.967975 |
| 7   | C      | -1.53944 | 0.209093 | 1.337989 |
| 8   | C      | -1.50385 | -0.01619 | -0.21145 |
| 9   | C      | -0.22695 | 0.642859 | -0.79319 |
| 10  | C      | 1.003389 | -0.10203 | -0.23779 |
| 11  | C      | -2.87414 | 0.57034  | -0.64507 |
| 12  | C      | -3.8174  | 0.303048 | 0.574715 |
| 13  | C      | -2.94075 | -0.30979 | 1.698438 |
| 14  | C      | 3.793234 | 0.134943 | 3.583119 |
| 15  | O      | 4.266502 | -1.12408 | 4.066493 |
| 16  | C      | 4.078076 | -0.07673 | 5.009794 |

|    |   |          |          |          |
|----|---|----------|----------|----------|
| 17 | C | 4.811565 | 0.929729 | 2.790899 |
| 18 | O | -1.01372 | -0.38013 | 4.22381  |
| 19 | O | 1.441182 | -1.1109  | -1.12558 |
| 20 | C | -1.52009 | 1.713239 | 1.733018 |
| 21 | C | 2.267307 | 2.058737 | 0.593643 |
| 22 | C | 2.133037 | 2.886232 | -0.66536 |
| 23 | O | 3.082677 | 2.57695  | -1.56003 |
| 24 | C | 3.005864 | 3.275589 | -2.80149 |
| 25 | O | 1.287332 | 3.728859 | -0.85582 |
| 26 | C | -1.50115 | -1.53888 | -0.52641 |
| 27 | O | -1.08626 | -1.83814 | -1.85439 |
| 28 | C | -1.93476 | -1.47206 | -2.93927 |
| 29 | C | -3.27901 | -2.2074  | -2.86949 |
| 30 | C | -4.17509 | -1.26238 | -2.05845 |
| 31 | C | -3.4067  | 0.09491  | -2.02935 |
| 32 | C | -1.11096 | -1.71728 | -4.19513 |
| 33 | C | -0.70473 | -3.17604 | -4.38572 |
| 34 | O | -2.28148 | -0.11448 | -2.90305 |
| 35 | C | -4.24055 | 1.204208 | -2.66046 |
| 36 | C | 2.32296  | 0.561033 | 0.321185 |
| 37 | C | 3.069006 | -1.68035 | 1.372662 |
| 38 | H | 2.061997 | 1.209827 | 3.020773 |
| 39 | H | 1.60638  | -1.6587  | 3.96313  |
| 40 | H | 1.349385 | -0.22002 | 4.943427 |
| 41 | H | -0.21971 | 0.606911 | -1.88335 |
| 42 | H | -0.22054 | 1.700017 | -0.52039 |
| 43 | H | -2.73603 | 1.652292 | -0.7475  |
| 44 | H | -4.65812 | -0.34829 | 0.32608  |
| 45 | H | -4.26448 | 1.241727 | 0.914255 |
| 46 | H | -2.97707 | -1.40397 | 1.687012 |
| 47 | H | -3.25022 | 0.004125 | 2.697033 |
| 48 | H | 4.994092 | 0.342108 | 5.427146 |
| 49 | H | 3.281466 | -0.237   | 5.732155 |
| 50 | H | 4.799438 | 0.664114 | 1.72948  |
| 51 | H | 5.816045 | 0.73707  | 3.175653 |
| 52 | H | 4.608228 | 2.002604 | 2.878396 |
| 53 | H | 0.657883 | -1.47127 | -1.57906 |
| 54 | H | -1.59118 | 1.781959 | 2.822699 |
| 55 | H | -0.60412 | 2.219764 | 1.423357 |
| 56 | H | -2.35942 | 2.273724 | 1.313295 |
| 57 | H | 1.431269 | 2.3312   | 1.241323 |
| 58 | H | 3.188709 | 2.371081 | 1.097909 |
| 59 | H | 2.042115 | 3.090972 | -3.28404 |
| 60 | H | 3.818795 | 2.881535 | -3.40978 |

|    |   |          |          |          |
|----|---|----------|----------|----------|
| 61 | H | 3.127449 | 4.350293 | -2.64669 |
| 62 | H | -2.47956 | -1.98648 | -0.33457 |
| 63 | H | -0.79058 | -2.07347 | 0.104692 |
| 64 | H | -3.17073 | -3.19936 | -2.42464 |
| 65 | H | -3.66192 | -2.33398 | -3.88643 |
| 66 | H | -4.36687 | -1.66152 | -1.06248 |
| 67 | H | -5.15187 | -1.13013 | -2.53161 |
| 68 | H | -1.70192 | -1.36505 | -5.04678 |
| 69 | H | -0.22172 | -1.07974 | -4.13366 |
| 70 | H | -1.58162 | -3.82634 | -4.47882 |
| 71 | H | -0.10995 | -3.53016 | -3.53966 |
| 72 | H | -0.10784 | -3.29072 | -5.29523 |
| 73 | H | -5.09289 | 1.451188 | -2.01748 |
| 74 | H | -3.63575 | 2.105868 | -2.79641 |
| 75 | H | -4.61887 | 0.889928 | -3.63831 |
| 76 | H | 3.165464 | 0.32851  | -0.33517 |
| 77 | H | 2.851199 | -2.41977 | 2.148251 |
| 78 | H | 2.833501 | -2.10959 | 0.398354 |
| 79 | H | 4.141901 | -1.47244 | 1.413283 |



### S18. Coordinates of 4-*epi*-1 used for NMR calculations

All conformers with population > 5% at 300K are listed. The structure refers to the lowest energy conformer.

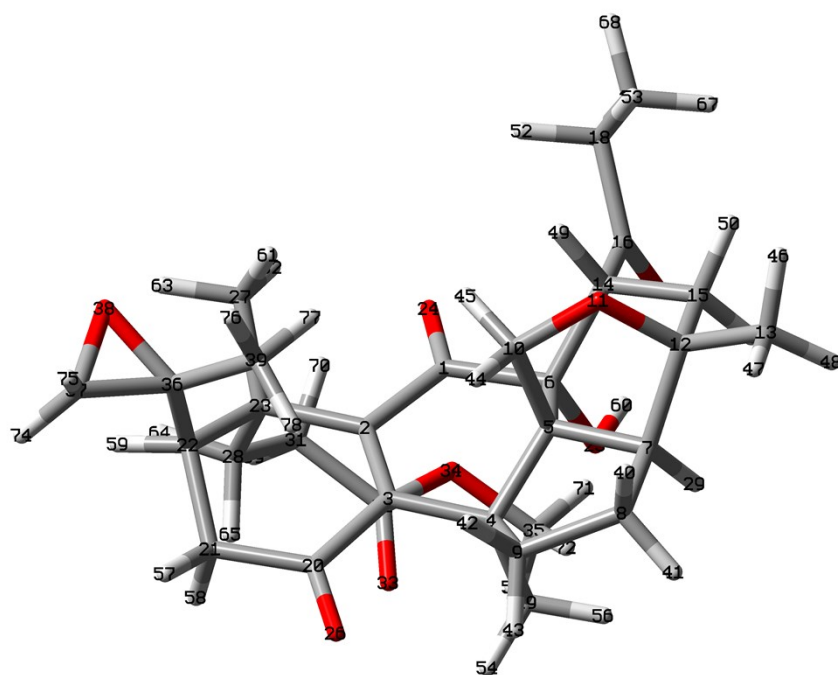

Conformer 1, DFT energy -1769.17175 au ( $\omega$ B97X-V/6-311+G(2df,2p))

| Tag | Symbol | X        | Y        | Z        |
|-----|--------|----------|----------|----------|
| C   | 1      | -0.7615  | 0.116438 | 0.486819 |
| C   | 2      | 0.563371 | 0.740016 | 0.889152 |
| C   | 3      | 1.729764 | 0.183637 | 0.453332 |
| C   | 4      | 1.762807 | -1.05078 | -0.4294  |
| C   | 5      | 0.49569  | -1.04397 | -1.28566 |
| C   | 6      | -0.78983 | -1.07953 | -0.49064 |
| C   | 7      | 0.652075 | -2.16465 | -2.29527 |
| C   | 8      | 2.152684 | -2.04856 | -2.66809 |
| C   | 9      | 2.844778 | -1.20823 | -1.54276 |
| C   | 10     | 0.416938 | 0.170115 | -2.26101 |
| O   | 11     | -0.15814 | -0.32131 | -3.46529 |
| C   | 12     | -0.40544 | -1.72668 | -3.31264 |
| C   | 13     | -0.33797 | -2.37756 | -4.68024 |
| C   | 14     | -1.9996  | -0.96303 | -1.4595  |
| C   | 15     | -1.80407 | -1.91419 | -2.66484 |
| C   | 16     | -3.33506 | -1.22414 | -0.77774 |
| O   | 17     | -3.50741 | -2.19792 | -0.06036 |
| C   | 18     | -4.44637 | -0.24743 | -1.06316 |
| C   | 19     | 1.919455 | -2.26892 | 0.514763 |

|   |    |          |          |          |
|---|----|----------|----------|----------|
| C | 20 | 3.054425 | 0.684288 | 0.942566 |
| C | 21 | 3.077689 | 1.877304 | 1.859377 |
| C | 22 | 1.858464 | 2.786306 | 1.714826 |
| C | 23 | 0.519749 | 1.984153 | 1.801844 |
| O | 24 | -1.82855 | 0.506474 | 0.926982 |
| O | 25 | -0.86124 | -2.2719  | 0.256744 |
| O | 26 | 4.085656 | 0.116729 | 0.635797 |
| C | 27 | -0.62031 | 2.962611 | 1.440531 |
| C | 28 | 0.370035 | 1.587824 | 3.304925 |
| H | 29 | 0.409693 | -3.1394  | -1.8665  |
| C | 30 | -5.78509 | -0.64723 | -0.45997 |
| C | 31 | -0.79329 | 0.68743  | 3.719657 |
| C | 32 | -0.49274 | -0.78505 | 3.53806  |
| O | 33 | 0.618788 | -1.2657  | 3.508305 |
| O | 34 | -1.61372 | -1.50826 | 3.469561 |
| C | 35 | -1.43218 | -2.92203 | 3.368095 |
| C | 36 | 2.038815 | 3.716099 | 0.509948 |
| C | 37 | 2.857985 | 4.915421 | 0.737924 |
| O | 38 | 1.442473 | 5.006507 | 0.657892 |
| C | 39 | 1.969935 | 3.168594 | -0.89821 |
| H | 40 | 2.272737 | -1.55195 | -3.63583 |
| H | 41 | 2.608797 | -3.03756 | -2.75846 |
| H | 42 | 3.186121 | -0.24406 | -1.92795 |
| H | 43 | 3.731728 | -1.70385 | -1.14995 |
| H | 44 | 1.399256 | 0.596334 | -2.48096 |
| H | 45 | -0.20095 | 0.987806 | -1.86933 |
| H | 46 | -1.06046 | -1.91311 | -5.35841 |
| H | 47 | 0.659374 | -2.26554 | -5.11369 |
| H | 48 | -0.56906 | -3.44499 | -4.60495 |
| H | 49 | -2.03879 | 0.053871 | -1.85664 |
| H | 50 | -2.57873 | -1.70419 | -3.41231 |
| H | 51 | -1.92655 | -2.95527 | -2.34392 |
| H | 52 | -4.10335 | 0.719528 | -0.67191 |
| H | 53 | -4.51211 | -0.11854 | -2.15228 |
| H | 54 | 2.924451 | -2.23305 | 0.944529 |
| H | 55 | 1.194973 | -2.2658  | 1.325842 |
| H | 56 | 1.817287 | -3.20615 | -0.04073 |
| H | 57 | 4.01233  | 2.41814  | 1.68277  |
| H | 58 | 3.144036 | 1.477646 | 2.877948 |
| H | 59 | 1.845523 | 3.466153 | 2.574987 |
| H | 60 | -1.81105 | -2.46565 | 0.387209 |
| H | 61 | -0.67078 | 3.156727 | 0.364909 |
| H | 62 | -1.59345 | 2.592052 | 1.753617 |
| H | 63 | -0.43051 | 3.921352 | 1.930676 |

|   |    |          |          |          |
|---|----|----------|----------|----------|
| H | 64 | 0.283824 | 2.530984 | 3.857236 |
| H | 65 | 1.28347  | 1.095557 | 3.649252 |
| H | 66 | -5.70311 | -0.7461  | 0.625435 |
| H | 67 | -6.12277 | -1.60969 | -0.85413 |
| H | 68 | -6.54628 | 0.105349 | -0.68442 |
| H | 69 | -0.96969 | 0.821207 | 4.795116 |
| H | 70 | -1.72963 | 0.929375 | 3.216369 |
| H | 71 | -2.43378 | -3.33349 | 3.243939 |
| H | 72 | -0.80785 | -3.16198 | 2.50586  |
| H | 73 | -0.96707 | -3.31214 | 4.277529 |
| H | 74 | 3.283909 | 5.101361 | 1.724274 |
| H | 75 | 3.403729 | 5.362092 | -0.09243 |
| H | 76 | 2.136611 | 3.976442 | -1.61507 |
| H | 77 | 0.990989 | 2.731077 | -1.10313 |
| H | 78 | 2.728058 | 2.396562 | -1.06678 |

Conformer 2, DFT energy -1769.17061 au ( $\omega$ B97X-V/6-311+G(2df,2p))

| Tag | Symbol | X        | Y        | Z        |
|-----|--------|----------|----------|----------|
| C   | 1      | -0.74163 | 0.1213   | 0.504504 |
| C   | 2      | 0.577102 | 0.771398 | 0.855505 |
| C   | 3      | 1.745127 | 0.268862 | 0.359805 |
| C   | 4      | 1.782509 | -0.95438 | -0.53373 |
| C   | 5      | 0.471839 | -1.0039  | -1.32079 |
| C   | 6      | -0.76967 | -1.08691 | -0.45918 |
| C   | 7      | 0.629445 | -2.12447 | -2.33175 |
| C   | 8      | 2.10178  | -1.93642 | -2.78434 |
| C   | 9      | 2.809962 | -1.05456 | -1.70128 |
| C   | 10     | 0.284701 | 0.195601 | -2.30062 |
| O   | 11     | -0.31701 | -0.33548 | -3.47573 |
| C   | 12     | -0.49712 | -1.74703 | -3.29582 |
| C   | 13     | -0.47143 | -2.41169 | -4.65839 |
| C   | 14     | -2.02989 | -1.03712 | -1.36749 |
| C   | 15     | -1.85155 | -1.98927 | -2.5746  |
| C   | 16     | -3.31797 | -1.34741 | -0.61907 |
| O   | 17     | -3.41042 | -2.30693 | 0.131473 |
| C   | 18     | -4.48837 | -0.43286 | -0.88078 |
| C   | 19     | 2.044366 | -2.17377 | 0.387382 |
| C   | 20     | 3.079206 | 0.80213  | 0.804109 |
| C   | 21     | 3.115154 | 2.033392 | 1.672942 |
| C   | 22     | 1.829395 | 2.850759 | 1.575538 |
| C   | 23     | 0.560241 | 1.978726 | 1.816552 |
| O   | 24     | -1.80131 | 0.504047 | 0.972745 |
| O   | 25     | -0.74859 | -2.2707  | 0.304333 |

|   |    |          |          |          |
|---|----|----------|----------|----------|
| O | 26 | 4.103539 | 0.216388 | 0.517766 |
| C | 27 | -0.66383 | 2.916541 | 1.67943  |
| C | 28 | 0.612015 | 1.500313 | 3.299578 |
| H | 29 | 0.457873 | -3.10699 | -1.88685 |
| C | 30 | -5.78076 | -0.8794  | -0.214   |
| C | 31 | -0.48205 | 0.537919 | 3.767596 |
| C | 32 | -0.12089 | -0.91622 | 3.547406 |
| O | 33 | 1.008713 | -1.34826 | 3.485034 |
| O | 34 | -1.21307 | -1.68414 | 3.491162 |
| C | 35 | -0.97594 | -3.08861 | 3.371669 |
| C | 36 | 1.901749 | 3.67186  | 0.275569 |
| C | 37 | 1.113797 | 3.403882 | -0.93144 |
| O | 38 | 2.465314 | 2.97837  | -0.8524  |
| C | 39 | 2.462198 | 5.063639 | 0.468142 |
| H | 40 | 2.145802 | -1.44333 | -3.75972 |
| H | 41 | 2.599869 | -2.90268 | -2.89236 |
| H | 42 | 3.075913 | -0.07189 | -2.09801 |
| H | 43 | 3.740803 | -1.50307 | -1.3565  |
| H | 44 | 1.227453 | 0.682223 | -2.56276 |
| H | 45 | -0.3695  | 0.972592 | -1.88876 |
| H | 46 | -1.24405 | -1.98437 | -5.3052  |
| H | 47 | 0.498456 | -2.26597 | -5.1414  |
| H | 48 | -0.6556  | -3.48646 | -4.56062 |
| H | 49 | -2.13532 | -0.02764 | -1.77101 |
| H | 50 | -2.67182 | -1.82215 | -3.28303 |
| H | 51 | -1.90962 | -3.03139 | -2.24027 |
| H | 52 | -4.17614 | 0.555931 | -0.51775 |
| H | 53 | -4.60371 | -0.32529 | -1.96856 |
| H | 54 | 3.072297 | -2.10474 | 0.750936 |
| H | 55 | 1.377689 | -2.20531 | 1.245019 |
| H | 56 | 1.938975 | -3.1092  | -0.17039 |
| H | 57 | 3.992032 | 2.616766 | 1.377201 |
| H | 58 | 3.3017   | 1.699662 | 2.698872 |
| H | 59 | 1.835506 | 3.586532 | 2.389114 |
| H | 60 | -1.67909 | -2.49262 | 0.506685 |
| H | 61 | -0.94417 | 3.114783 | 0.644593 |
| H | 62 | -1.54796 | 2.52149  | 2.17515  |
| H | 63 | -0.41306 | 3.877372 | 2.145144 |
| H | 64 | 0.575734 | 2.403193 | 3.921517 |
| H | 65 | 1.565105 | 1.006902 | 3.503352 |
| H | 66 | -5.64208 | -0.96857 | 0.866273 |
| H | 67 | -6.10228 | -1.85508 | -0.58962 |
| H | 68 | -6.57943 | -0.15589 | -0.40126 |
| H | 69 | -0.60991 | 0.64543  | 4.852529 |

|   |    |          |          |          |
|---|----|----------|----------|----------|
| H | 70 | -1.45638 | 0.734021 | 3.318474 |
| H | 71 | -1.96402 | -3.54366 | 3.301631 |
| H | 72 | -0.39356 | -3.29899 | 2.473328 |
| H | 73 | -0.44376 | -3.45993 | 4.250711 |
| H | 74 | 0.383978 | 2.601162 | -0.94103 |
| H | 75 | 0.918215 | 4.213566 | -1.63474 |
| H | 76 | 2.638607 | 5.54562  | -0.49694 |
| H | 77 | 3.413681 | 5.025072 | 1.010278 |
| H | 78 | 1.765119 | 5.677301 | 1.049137 |

Conformer 3, DFT energy -1769.17060 au ( $\omega$ B97X-V/6-311+G(2df,2p))

| Tag | Symbol | X        | Y        | Z        |
|-----|--------|----------|----------|----------|
| C   | 1      | -0.83022 | -0.17295 | 0.611562 |
| C   | 2      | 0.445407 | 0.616848 | 0.839394 |
| C   | 3      | 1.598472 | 0.230206 | 0.223704 |
| C   | 4      | 1.638302 | -0.91048 | -0.77436 |
| C   | 5      | 0.265811 | -0.96869 | -1.44726 |
| C   | 6      | -0.88137 | -1.2474  | -0.49934 |
| C   | 7      | 0.389288 | -1.94596 | -2.5996  |
| C   | 8      | 1.79974  | -1.61258 | -3.15063 |
| C   | 9      | 2.559491 | -0.82387 | -2.03208 |
| C   | 10     | -0.07438 | 0.326702 | -2.24756 |
| O   | 11     | -0.76824 | -0.09528 | -3.41444 |
| C   | 12     | -0.84413 | -1.52864 | -3.40743 |
| C   | 13     | -0.91002 | -2.01344 | -4.84216 |
| C   | 14     | -2.22253 | -1.16136 | -1.28117 |
| C   | 15     | -2.10814 | -1.94684 | -2.60941 |
| C   | 16     | -3.41494 | -1.64749 | -0.47082 |
| O   | 17     | -3.38836 | -2.71288 | 0.126834 |
| C   | 18     | -4.64526 | -0.77595 | -0.48369 |
| C   | 19     | 2.062111 | -2.18564 | -0.00835 |
| C   | 20     | 2.91543  | 0.822385 | 0.62459  |
| C   | 21     | 2.904384 | 1.785988 | 1.77417  |
| C   | 22     | 1.664058 | 2.683668 | 1.773096 |
| C   | 23     | 0.328776 | 1.868858 | 1.730055 |
| O   | 24     | -1.82896 | -0.00734 | 1.290059 |
| O   | 25     | -0.72595 | -2.52359 | 0.080668 |
| O   | 26     | 3.948624 | 0.47761  | 0.084215 |
| C   | 27     | -0.79851 | 2.769891 | 1.16191  |
| C   | 28     | -0.12955 | 1.55284  | 3.187378 |
| H   | 29     | 0.312984 | -2.98356 | -2.26702 |
| C   | 30     | -5.84016 | -1.3893  | 0.230758 |
| C   | 31     | 0.796574 | 0.781276 | 4.139976 |

|   |    |          |          |          |
|---|----|----------|----------|----------|
| C | 32 | 1.051415 | -0.64237 | 3.702408 |
| O | 33 | 2.098334 | -1.06675 | 3.264152 |
| O | 34 | -0.05222 | -1.38118 | 3.855488 |
| C | 35 | 0.009631 | -2.74011 | 3.412557 |
| C | 36 | 1.847544 | 3.773298 | 0.709356 |
| C | 37 | 2.557984 | 4.986563 | 1.137294 |
| O | 38 | 1.146187 | 4.990109 | 0.975863 |
| C | 39 | 1.928372 | 3.403131 | -0.75798 |
| H | 40 | 1.726058 | -1.00219 | -4.0561  |
| H | 41 | 2.336522 | -2.5246  | -3.42382 |
| H | 42 | 2.747449 | 0.208404 | -2.33617 |
| H | 43 | 3.537542 | -1.25565 | -1.82195 |
| H | 44 | 0.822062 | 0.877928 | -2.54474 |
| H | 45 | -0.70099 | 1.027251 | -1.68104 |
| H | 46 | -1.76293 | -1.56006 | -5.35696 |
| H | 47 | 0.000179 | -1.74381 | -5.38471 |
| H | 48 | -1.0252  | -3.10197 | -4.87071 |
| H | 49 | -2.415   | -0.11789 | -1.54128 |
| H | 50 | -2.99906 | -1.74669 | -3.21556 |
| H | 51 | -2.07976 | -3.02263 | -2.40628 |
| H | 52 | -4.34857 | 0.176078 | -0.02271 |
| H | 53 | -4.87574 | -0.53734 | -1.532   |
| H | 54 | 3.103169 | -2.06408 | 0.30314  |
| H | 55 | 1.459288 | -2.36218 | 0.878343 |
| H | 56 | 1.993986 | -3.06717 | -0.65325 |
| H | 57 | 3.826976 | 2.37261  | 1.745838 |
| H | 58 | 2.943819 | 1.152469 | 2.665328 |
| H | 59 | 1.642347 | 3.233378 | 2.721946 |
| H | 60 | -1.62393 | -2.84823 | 0.298003 |
| H | 61 | -0.68261 | 2.954062 | 0.090081 |
| H | 62 | -1.7744  | 2.310905 | 1.324427 |
| H | 63 | -0.77678 | 3.741658 | 1.66115  |
| H | 64 | -1.07954 | 1.021006 | 3.135906 |
| H | 65 | -0.33418 | 2.522627 | 3.655885 |
| H | 66 | -5.60615 | -1.57402 | 1.282632 |
| H | 67 | -6.11613 | -2.34719 | -0.2195  |
| H | 68 | -6.70348 | -0.71913 | 0.178267 |
| H | 69 | 1.756435 | 1.280149 | 4.284488 |
| H | 70 | 0.296384 | 0.744663 | 5.113345 |
| H | 71 | -0.13158 | -2.77745 | 2.33006  |
| H | 72 | 0.967874 | -3.18706 | 3.681519 |
| H | 73 | -0.81204 | -3.25198 | 3.913773 |
| H | 74 | 2.912942 | 5.073834 | 2.164337 |
| H | 75 | 3.113242 | 5.572662 | 0.405345 |

|   |    |          |          |          |
|---|----|----------|----------|----------|
| H | 76 | 1.954629 | 4.316785 | -1.35718 |
| H | 77 | 1.067593 | 2.812659 | -1.07993 |
| H | 78 | 2.833588 | 2.826439 | -0.9721  |

Conformer 4, DFT energy -1769.17054 au ( $\omega$ B97X-V/6-311+G(2df,2p))

| Tag | Symbol | X        | Y        | Z        |
|-----|--------|----------|----------|----------|
| C   | 1      | -1.10579 | 0.008251 | 0.108184 |
| C   | 2      | 0.224166 | 0.707366 | 0.3279   |
| C   | 3      | 1.373761 | 0.131303 | -0.11603 |
| C   | 4      | 1.417255 | -1.26801 | -0.69438 |
| C   | 5      | 0.092952 | -1.5067  | -1.41735 |
| C   | 6      | -1.13275 | -1.39483 | -0.53284 |
| C   | 7      | 0.243597 | -2.82646 | -2.14991 |
| C   | 8      | 1.707689 | -2.74267 | -2.65979 |
| C   | 9      | 2.428449 | -1.6338  | -1.82088 |
| C   | 10     | -0.11633 | -0.55939 | -2.63896 |
| O   | 11     | -0.75623 | -1.34047 | -3.64132 |
| C   | 12     | -0.9059  | -2.68178 | -3.15188 |
| C   | 13     | -0.89799 | -3.62812 | -4.3361  |
| C   | 14     | -2.40536 | -1.56948 | -1.40474 |
| C   | 15     | -2.23934 | -2.77301 | -2.3606  |
| C   | 16     | -3.68052 | -1.70295 | -0.58722 |
| O   | 17     | -3.74187 | -2.43033 | 0.392037 |
| C   | 18     | -4.87841 | -0.92422 | -1.07193 |
| C   | 19     | 1.712813 | -2.23534 | 0.479457 |
| C   | 20     | 2.676489 | 0.837735 | 0.059847 |
| C   | 21     | 2.578226 | 2.325701 | 0.22895  |
| C   | 22     | 1.596723 | 2.613066 | 1.369001 |
| C   | 23     | 0.16319  | 2.049962 | 1.084088 |
| O   | 24     | -2.16839 | 0.51508  | 0.423491 |
| O   | 25     | -1.07666 | -2.35119 | 0.499722 |
| O   | 26     | 3.736439 | 0.240457 | 0.058577 |
| C   | 27     | -0.64035 | 3.064656 | 0.243686 |
| C   | 28     | -0.57097 | 1.8441   | 2.448276 |
| H   | 29     | 0.088129 | -3.68338 | -1.49131 |
| C   | 30     | -6.16235 | -1.23659 | -0.31774 |
| C   | 31     | -0.22118 | 0.57316  | 3.248969 |
| C   | 32     | 1.19724  | 0.570484 | 3.764324 |
| O   | 33     | 1.619814 | 1.285754 | 4.645039 |
| O   | 34     | 1.973428 | -0.29544 | 3.090218 |
| C   | 35     | 3.357301 | -0.29441 | 3.436658 |
| C   | 36     | 1.683157 | 4.101244 | 1.756178 |
| C   | 37     | 2.195329 | 4.423326 | 3.098746 |

|   |    |          |          |          |
|---|----|----------|----------|----------|
| O | 38 | 0.807631 | 4.534978 | 2.798142 |
| C | 39 | 1.888602 | 5.136169 | 0.665768 |
| H | 40 | 1.731988 | -2.48519 | -3.72307 |
| H | 41 | 2.211852 | -3.70644 | -2.5535  |
| H | 42 | 2.689091 | -0.77484 | -2.44487 |
| H | 43 | 3.36605  | -1.99102 | -1.39421 |
| H | 44 | 0.827047 | -0.17448 | -3.03535 |
| H | 45 | -0.73629 | 0.313721 | -2.40107 |
| H | 46 | -1.69255 | -3.36127 | -5.03964 |
| H | 47 | 0.057865 | -3.58    | -4.86443 |
| H | 48 | -1.06183 | -4.65743 | -4.00126 |
| H | 49 | -2.52418 | -0.68331 | -2.03118 |
| H | 50 | -3.0786  | -2.78466 | -3.06593 |
| H | 51 | -2.26962 | -3.71026 | -1.79366 |
| H | 52 | -4.60525 | 0.13571  | -0.97504 |
| H | 53 | -4.9859  | -1.1043  | -2.15133 |
| H | 54 | 2.730011 | -2.03524 | 0.825615 |
| H | 55 | 1.022223 | -2.11294 | 1.309386 |
| H | 56 | 1.662717 | -3.27507 | 0.141332 |
| H | 57 | 2.227577 | 2.770132 | -0.71181 |
| H | 58 | 3.574995 | 2.718922 | 0.445557 |
| H | 59 | 1.982409 | 2.066588 | 2.230626 |
| H | 60 | -2.00054 | -2.53647 | 0.764633 |
| H | 61 | -0.13456 | 3.283577 | -0.70417 |
| H | 62 | -1.6336  | 2.678142 | 0.018188 |
| H | 63 | -0.75952 | 3.998515 | 0.799895 |
| H | 64 | -1.64456 | 1.814835 | 2.259774 |
| H | 65 | -0.36727 | 2.719361 | 3.067434 |
| H | 66 | -6.04762 | -1.0154  | 0.746577 |
| H | 67 | -6.42347 | -2.29498 | -0.4088  |
| H | 68 | -6.99096 | -0.63993 | -0.71022 |
| H | 69 | -0.87393 | 0.55171  | 4.126764 |
| H | 70 | -0.40561 | -0.33505 | 2.66913  |
| H | 71 | 3.822279 | -1.0334  | 2.786345 |
| H | 72 | 3.796147 | 0.690867 | 3.254101 |
| H | 73 | 3.490772 | -0.55645 | 4.48867  |
| H | 74 | 2.447055 | 3.619546 | 3.788794 |
| H | 75 | 2.706353 | 5.371208 | 3.265148 |
| H | 76 | 2.869813 | 5.027664 | 0.192738 |
| H | 77 | 1.831398 | 6.13289  | 1.109316 |
| H | 78 | 1.126258 | 5.070516 | -0.11476 |



Conformer 5, DFT energy -1769.16976 au ( $\omega$ B97X-V/6-311+G(2df,2p))

| Tag | Symbol | X        | Y        | Z        |
|-----|--------|----------|----------|----------|
| C   | 1      | -0.81333 | -0.0075  | 0.532876 |
| C   | 2      | 0.510472 | 0.631041 | 0.911624 |
| C   | 3      | 1.675418 | 0.065341 | 0.486056 |
| C   | 4      | 1.697926 | -1.18169 | -0.37992 |
| C   | 5      | 0.44091  | -1.15844 | -1.25161 |
| C   | 6      | -0.85797 | -1.17857 | -0.47504 |
| C   | 7      | 0.592503 | -2.27961 | -2.26141 |
| C   | 8      | 2.099709 | -2.19275 | -2.61236 |
| C   | 9      | 2.791678 | -1.36633 | -1.47706 |
| C   | 10     | 0.39679  | 0.05887  | -2.22423 |
| O   | 11     | -0.16451 | -0.41842 | -3.43966 |
| C   | 12     | -0.44031 | -1.81849 | -3.29424 |
| C   | 13     | -0.36488 | -2.4686  | -4.66182 |
| C   | 14     | -2.04718 | -1.02399 | -1.46296 |
| C   | 15     | -1.85208 | -1.97749 | -2.66914 |
| C   | 16     | -3.41333 | -1.26379 | -0.83518 |
| O   | 17     | -3.61155 | -2.17745 | -0.04882 |
| C   | 18     | -4.54009 | -0.36206 | -1.28202 |
| C   | 19     | 1.815243 | -2.3938  | 0.576007 |
| C   | 20     | 2.998537 | 0.570306 | 0.971004 |
| C   | 21     | 3.022972 | 1.789659 | 1.855792 |
| C   | 22     | 1.801138 | 2.694408 | 1.699875 |
| C   | 23     | 0.463222 | 1.890244 | 1.802712 |
| O   | 24     | -1.86729 | 0.345042 | 1.031022 |
| O   | 25     | -0.97251 | -2.38453 | 0.244972 |
| O   | 26     | 4.0296   | -0.01173 | 0.688522 |
| C   | 27     | -0.68192 | 2.852837 | 1.417303 |
| C   | 28     | 0.323027 | 1.526402 | 3.316007 |
| H   | 29     | 0.324372 | -3.25019 | -1.83831 |
| C   | 30     | -4.4488  | 1.032358 | -0.64534 |
| C   | 31     | -0.85886 | 0.674536 | 3.7775   |
| C   | 32     | -0.62593 | -0.80831 | 3.590043 |
| O   | 33     | 0.463505 | -1.3296  | 3.495099 |
| O   | 34     | -1.77446 | -1.48923 | 3.587606 |
| C   | 35     | -1.65198 | -2.90553 | 3.450293 |
| C   | 36     | 1.979112 | 3.611075 | 0.484901 |
| C   | 37     | 2.774688 | 4.828468 | 0.705614 |
| O   | 38     | 1.35912  | 4.89234  | 0.610245 |
| C   | 39     | 1.932588 | 3.044919 | -0.91613 |
| H   | 40     | 2.243987 | -1.69856 | -3.57805 |
| H   | 41     | 2.537419 | -3.19049 | -2.6964  |

|   |    |          |          |          |
|---|----|----------|----------|----------|
| H | 42 | 3.16171  | -0.41101 | -1.85855 |
| H | 43 | 3.660647 | -1.88209 | -1.06946 |
| H | 44 | 1.38928  | 0.470454 | -2.42623 |
| H | 45 | -0.21493 | 0.884484 | -1.83943 |
| H | 46 | -1.06724 | -1.98865 | -5.35063 |
| H | 47 | 0.641341 | -2.37653 | -5.0795  |
| H | 48 | -0.61888 | -3.5313  | -4.59162 |
| H | 49 | -2.05291 | -0.00773 | -1.86341 |
| H | 50 | -2.60912 | -1.75032 | -3.42828 |
| H | 51 | -2.00063 | -3.01532 | -2.35215 |
| H | 52 | -4.50129 | -0.26706 | -2.37539 |
| H | 53 | -5.48161 | -0.84488 | -1.00877 |
| H | 54 | 2.809408 | -2.36806 | 1.031725 |
| H | 55 | 1.0696   | -2.3767  | 1.367973 |
| H | 56 | 1.715311 | -3.33321 | 0.023321 |
| H | 57 | 3.954657 | 2.329019 | 1.656437 |
| H | 58 | 3.100951 | 1.418457 | 2.884905 |
| H | 59 | 1.788742 | 3.38562  | 2.550922 |
| H | 60 | -1.9302  | -2.5249  | 0.392968 |
| H | 61 | -0.71803 | 3.035257 | 0.338647 |
| H | 62 | -1.65533 | 2.474103 | 1.719377 |
| H | 63 | -0.50946 | 3.819604 | 1.897996 |
| H | 64 | 0.275303 | 2.482444 | 3.850357 |
| H | 65 | 1.227825 | 1.01355  | 3.652561 |
| H | 66 | -3.5137  | 1.53722  | -0.90522 |
| H | 67 | -4.49404 | 0.962917 | 0.443911 |
| H | 68 | -5.279   | 1.652931 | -0.99457 |
| H | 69 | -0.98864 | 0.821234 | 4.858115 |
| H | 70 | -1.80274 | 0.951615 | 3.308534 |
| H | 71 | -2.67176 | -3.27765 | 3.36123  |
| H | 72 | -1.07435 | -3.14827 | 2.556453 |
| H | 73 | -1.1637  | -3.3329  | 4.329843 |
| H | 74 | 3.186634 | 5.035225 | 1.69333  |
| H | 75 | 3.320533 | 5.27304  | -0.12575 |
| H | 76 | 2.113816 | 3.841409 | -1.6426  |
| H | 77 | 0.954969 | 2.610078 | -1.13094 |
| H | 78 | 2.689883 | 2.267231 | -1.06145 |

### S19. Coordinates of 4-*epi*-2 used for NMR calculations

All conformers with population > 5% at 300K are listed. The structure refers to the lowest energy conformer.

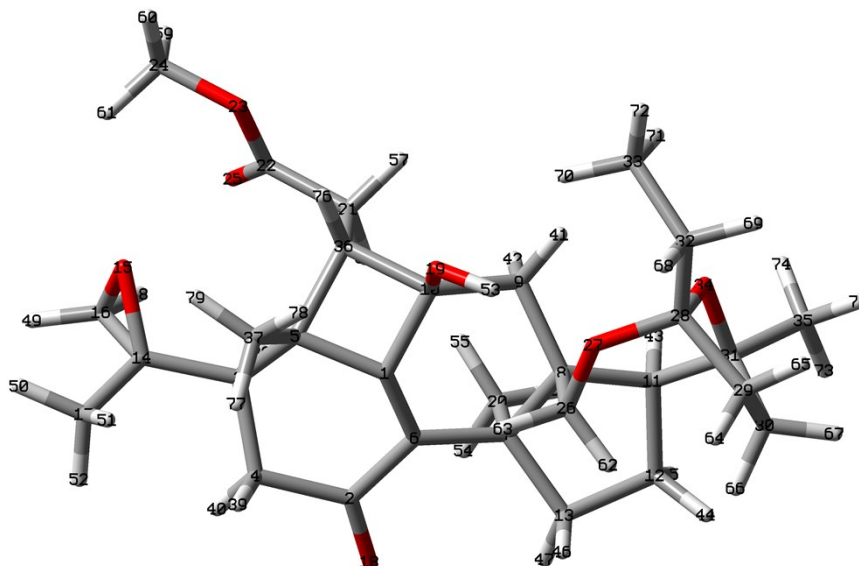

Conformer 1, DFT energy -1695.12167 au ( $\omega$ B97X-V/6-311+G(2df,2p))

| Tag | Symbol | X        | Y        | Z        |
|-----|--------|----------|----------|----------|
| C   | 1      | 1.207861 | 0.315468 | 0.004672 |
| C   | 2      | 2.851898 | -1.3888  | -0.43172 |
| C   | 3      | 3.061572 | 0.067692 | 1.658155 |
| C   | 4      | 3.785991 | -0.57195 | 0.457071 |
| C   | 5      | 1.951017 | 1.001067 | 1.120371 |
| C   | 6      | 1.479018 | -0.86136 | -0.58081 |
| C   | 7      | 0.328196 | -1.72693 | -1.05381 |
| C   | 8      | -0.95251 | -0.85009 | -1.26298 |
| C   | 9      | -1.29367 | -0.12558 | 0.064439 |
| C   | 10     | -0.15481 | 0.862189 | 0.389741 |
| C   | 11     | -1.9659  | -1.8997  | -1.79681 |
| C   | 12     | -1.08723 | -2.93539 | -2.57357 |
| C   | 13     | 0.390814 | -2.51197 | -2.37397 |
| C   | 14     | 4.051935 | 0.705797 | 2.63445  |
| O   | 15     | 3.422857 | 1.362949 | 3.73836  |
| C   | 16     | 4.14815  | 0.160596 | 3.995862 |
| C   | 17     | 5.276433 | 1.417362 | 2.093089 |
| O   | 18     | 3.229407 | -2.41599 | -0.96853 |
| O   | 19     | -0.44469 | 2.163348 | -0.08618 |
| C   | 20     | 0.158327 | -2.78819 | 0.071457 |
| C   | 21     | 0.135873 | 0.016466 | 2.841288 |

|   |    |          |          |          |
|---|----|----------|----------|----------|
| C | 22 | 0.729955 | 0.226076 | 4.21511  |
| O | 23 | 0.492993 | 1.459115 | 4.670499 |
| C | 24 | 1.077491 | 1.771065 | 5.933978 |
| O | 25 | 1.295139 | -0.63373 | 4.853542 |
| C | 26 | -0.70682 | 0.20504  | -2.37719 |
| O | 27 | -1.65451 | 1.267947 | -2.36419 |
| C | 28 | -3.00108 | 0.988227 | -2.74427 |
| C | 29 | -3.06883 | 0.507728 | -4.20047 |
| C | 30 | -2.9641  | -1.01926 | -4.09361 |
| C | 31 | -3.186   | -1.33391 | -2.58188 |
| C | 32 | -3.79073 | 2.258177 | -2.44982 |
| C | 33 | -3.89757 | 2.600101 | -0.96473 |
| O | 34 | -3.5513  | -0.06847 | -2.0043  |
| C | 35 | -4.38221 | -2.25965 | -2.39062 |
| C | 36 | 0.50756  | 1.067387 | 1.806253 |
| C | 37 | 2.438142 | 2.415179 | 0.78596  |
| H | 38 | 2.564985 | -0.74684 | 2.199541 |
| H | 39 | 4.249497 | 0.206038 | -0.16493 |
| H | 40 | 4.587251 | -1.2429  | 0.780724 |
| H | 41 | -2.24209 | 0.407715 | -0.00387 |
| H | 42 | -1.41199 | -0.87405 | 0.852407 |
| H | 43 | -2.39638 | -2.39695 | -0.92034 |
| H | 44 | -1.34488 | -2.99922 | -3.63294 |
| H | 45 | -1.24929 | -3.93954 | -2.17136 |
| H | 46 | 0.744403 | -1.88245 | -3.19708 |
| H | 47 | 1.072096 | -3.36238 | -2.31361 |
| H | 48 | 3.532087 | -0.6835  | 4.296548 |
| H | 49 | 5.072964 | 0.29755  | 4.55647  |
| H | 50 | 5.800657 | 1.9097   | 2.916575 |
| H | 51 | 5.024131 | 2.178026 | 1.351765 |
| H | 52 | 5.962766 | 0.702741 | 1.627435 |
| H | 53 | -0.92942 | 2.076228 | -0.92642 |
| H | 54 | 1.056193 | -3.41203 | 0.091579 |
| H | 55 | 0.049556 | -2.33581 | 1.058111 |
| H | 56 | -0.69838 | -3.44731 | -0.08732 |
| H | 57 | -0.95519 | 0.034729 | 2.962056 |
| H | 58 | 0.410384 | -0.99417 | 2.530384 |
| H | 59 | 0.744014 | 1.065197 | 6.697717 |
| H | 60 | 0.742182 | 2.780277 | 6.17204  |
| H | 61 | 2.165014 | 1.740058 | 5.851277 |
| H | 62 | -0.68043 | -0.25905 | -3.36621 |
| H | 63 | 0.256796 | 0.69948  | -2.24763 |
| H | 64 | -2.2791  | 0.961685 | -4.80374 |
| H | 65 | -4.03063 | 0.805157 | -4.62667 |

|   |    |          |          |          |
|---|----|----------|----------|----------|
| H | 66 | -2.00279 | -1.37588 | -4.46382 |
| H | 67 | -3.73012 | -1.51641 | -4.69479 |
| H | 68 | -3.31749 | 3.077794 | -3.00201 |
| H | 69 | -4.7945  | 2.121638 | -2.86626 |
| H | 70 | -2.91791 | 2.756812 | -0.50637 |
| H | 71 | -4.40025 | 1.793358 | -0.42362 |
| H | 72 | -4.48111 | 3.516014 | -0.83035 |
| H | 73 | -4.14958 | -3.26206 | -2.76694 |
| H | 74 | -4.63879 | -2.33805 | -1.3297  |
| H | 75 | -5.25413 | -1.8764  | -2.92974 |
| H | 76 | 0.27999  | 2.063842 | 2.191337 |
| H | 77 | 3.270061 | 2.386803 | 0.073656 |
| H | 78 | 1.631988 | 2.993787 | 0.333843 |
| H | 79 | 2.768794 | 2.92234  | 1.697429 |

Conformer 2, DFT energy -1695.12140 au ( $\omega$ B97X-V/6-311+G(2df,2p))

| Tag | Symbol | X        | Y        | Z        |
|-----|--------|----------|----------|----------|
| C   | 1      | 1.174496 | 0.27684  | 0.112091 |
| C   | 2      | 2.829925 | -1.41777 | -0.32152 |
| C   | 3      | 3.033651 | 0.045466 | 1.763469 |
| C   | 4      | 3.760111 | -0.59239 | 0.563298 |
| C   | 5      | 1.914371 | 0.968241 | 1.225955 |
| C   | 6      | 1.453404 | -0.89989 | -0.47003 |
| C   | 7      | 0.308811 | -1.77413 | -0.94247 |
| C   | 8      | -0.97523 | -0.90368 | -1.15324 |
| C   | 9      | -1.32247 | -0.18087 | 0.173354 |
| C   | 10     | -0.19256 | 0.816061 | 0.498753 |
| C   | 11     | -1.98412 | -1.95675 | -1.68561 |
| C   | 12     | -1.10163 | -2.98393 | -2.46889 |
| C   | 13     | 0.375753 | -2.55922 | -2.26283 |
| C   | 14     | 4.020593 | 0.693401 | 2.736561 |
| O   | 15     | 3.389154 | 1.34271  | 3.84321  |
| C   | 16     | 4.127606 | 0.14799  | 4.09723  |
| C   | 17     | 5.235726 | 1.417486 | 2.19093  |
| O   | 18     | 3.213684 | -2.4446  | -0.85584 |
| O   | 19     | -0.50125 | 2.112514 | 0.027156 |
| C   | 20     | 0.144435 | -2.8366  | 0.181987 |
| C   | 21     | 0.110595 | -0.0322  | 2.948931 |
| C   | 22     | 0.708124 | 0.178295 | 4.32133  |
| O   | 23     | 0.461792 | 1.408357 | 4.781801 |
| C   | 24     | 1.045168 | 1.719715 | 6.045001 |
| O   | 25     | 1.284019 | -0.67867 | 4.954718 |
| C   | 26     | -0.7289  | 0.148042 | -2.27123 |

|   |    |          |          |          |
|---|----|----------|----------|----------|
| O | 27 | -1.6765  | 1.20917  | -2.26387 |
| C | 28 | -3.02578 | 0.929859 | -2.62826 |
| C | 29 | -3.12258 | 0.447624 | -4.08123 |
| C | 30 | -3.00698 | -1.07823 | -3.97219 |
| C | 31 | -3.21262 | -1.39095 | -2.45805 |
| C | 32 | -3.80367 | 2.195148 | -2.29682 |
| C | 33 | -3.35658 | 3.415364 | -3.09717 |
| O | 34 | -3.5689  | -0.12327 | -1.87788 |
| C | 35 | -4.40803 | -2.31421 | -2.25282 |
| C | 36 | 0.472118 | 1.022696 | 1.914722 |
| C | 37 | 2.387045 | 2.385715 | 0.887228 |
| H | 38 | 2.544926 | -0.77162 | 2.308114 |
| H | 39 | 4.218151 | 0.185862 | -0.06124 |
| H | 40 | 4.565353 | -1.25718 | 0.887759 |
| H | 41 | -2.27426 | 0.34718  | 0.103857 |
| H | 42 | -1.43863 | -0.93031 | 0.960668 |
| H | 43 | -2.40609 | -2.45997 | -0.80851 |
| H | 44 | -1.3561  | -3.03959 | -3.52947 |
| H | 45 | -1.26313 | -3.99159 | -2.07543 |
| H | 46 | 0.733029 | -1.93036 | -3.0847  |
| H | 47 | 1.056853 | -3.40953 | -2.19982 |
| H | 48 | 3.522347 | -0.70347 | 4.397782 |
| H | 49 | 5.053267 | 0.294002 | 4.654182 |
| H | 50 | 5.759398 | 1.913207 | 3.012713 |
| H | 51 | 4.972363 | 2.177017 | 1.452302 |
| H | 52 | 5.926359 | 0.710365 | 1.720355 |
| H | 53 | -1.01238 | 2.019092 | -0.79744 |
| H | 54 | 1.047642 | -3.45204 | 0.205789 |
| H | 55 | 0.026979 | -2.38608 | 1.168307 |
| H | 56 | -0.70493 | -3.50376 | 0.018757 |
| H | 57 | -0.98014 | -0.0208  | 3.073265 |
| H | 58 | 0.38976  | -1.04031 | 2.634679 |
| H | 59 | 0.730444 | 0.999056 | 6.803069 |
| H | 60 | 0.687691 | 2.71984  | 6.292722 |
| H | 61 | 2.133452 | 1.712747 | 5.958284 |
| H | 62 | -0.70207 | -0.3194  | -3.25885 |
| H | 63 | 0.233168 | 0.644778 | -2.14157 |
| H | 64 | -2.35124 | 0.902682 | -4.70679 |
| H | 65 | -4.09729 | 0.739973 | -4.4826  |
| H | 66 | -2.04579 | -1.42752 | -4.34954 |
| H | 67 | -3.77362 | -1.58241 | -4.56663 |
| H | 68 | -4.86285 | 1.98246  | -2.47401 |
| H | 69 | -3.68666 | 2.380244 | -1.22321 |
| H | 70 | -3.4992  | 3.261419 | -4.17299 |

|   |    |          |          |          |
|---|----|----------|----------|----------|
| H | 71 | -2.2984  | 3.630952 | -2.92369 |
| H | 72 | -3.9371  | 4.296902 | -2.80739 |
| H | 73 | -4.18108 | -3.31727 | -2.63057 |
| H | 74 | -4.65285 | -2.39112 | -1.18925 |
| H | 75 | -5.28517 | -1.93051 | -2.78269 |
| H | 76 | 0.238532 | 2.016876 | 2.301553 |
| H | 77 | 3.21592  | 2.363385 | 0.171816 |
| H | 78 | 1.573833 | 2.955718 | 0.436996 |
| H | 79 | 2.716727 | 2.897741 | 1.795683 |

Conformer 3, DFT energy -1695.12089 au ( $\omega$ B97X-V/6-311+G(2df,2p))

| Tag | Symbol | X        | Y        | Z        |
|-----|--------|----------|----------|----------|
| C   | 1      | 1.58891  | 0.289963 | 0.122165 |
| C   | 2      | 3.178213 | -1.47591 | -0.26382 |
| C   | 3      | 3.450202 | 0.042428 | 1.761226 |
| C   | 4      | 4.148063 | -0.64376 | 0.571768 |
| C   | 5      | 2.371277 | 0.995118 | 1.199476 |
| C   | 6      | 1.814194 | -0.91838 | -0.4121  |
| C   | 7      | 0.627491 | -1.76569 | -0.82456 |
| C   | 8      | -0.62799 | -0.85826 | -1.05669 |
| C   | 9      | -0.92148 | -0.05709 | 0.236164 |
| C   | 10     | 0.254818 | 0.904886 | 0.495214 |
| C   | 11     | -1.68324 | -1.9013  | -1.51309 |
| C   | 12     | -0.85443 | -2.99338 | -2.26636 |
| C   | 13     | 0.641416 | -2.61556 | -2.10524 |
| C   | 14     | 4.418744 | 0.691506 | 2.74495  |
| O   | 15     | 5.642152 | -0.0151  | 2.953384 |
| C   | 16     | 5.704752 | 1.250519 | 2.308489 |
| C   | 17     | 3.796541 | 1.205098 | 4.024412 |
| O   | 18     | 3.517442 | -2.53037 | -0.77007 |
| O   | 19     | 0.016685 | 2.189313 | -0.05009 |
| C   | 20     | 0.444332 | -2.7631  | 0.355865 |
| C   | 21     | 0.578603 | 0.193938 | 3.004471 |
| C   | 22     | -0.90103 | 0.156538 | 3.32716  |
| O   | 23     | -1.49115 | 1.340693 | 3.11683  |
| C   | 24     | -2.90596 | 1.362101 | 3.292314 |
| O   | 25     | -1.4883  | -0.8224  | 3.723478 |
| C   | 26     | -0.37609 | 0.130336 | -2.228   |
| O   | 27     | -1.28819 | 1.224472 | -2.24211 |
| C   | 28     | -2.65802 | 0.973299 | -2.55724 |
| C   | 29     | -2.79963 | 0.431412 | -3.98601 |
| C   | 30     | -2.73417 | -1.09234 | -3.81402 |
| C   | 31     | -2.91148 | -1.33246 | -2.28288 |

|   |    |          |          |          |
|---|----|----------|----------|----------|
| C | 32 | -3.39245 | 2.281147 | -2.2852  |
| C | 33 | -3.44098 | 2.674279 | -0.80828 |
| O | 34 | -3.21436 | -0.03013 | -1.75135 |
| C | 35 | -4.13075 | -2.20483 | -2.00572 |
| C | 36 | 0.940517 | 1.162786 | 1.890341 |
| C | 37 | 2.943563 | 2.358036 | 0.790685 |
| H | 38 | 2.94353  | -0.75569 | 2.322166 |
| H | 39 | 4.59541  | 0.104486 | -0.0978  |
| H | 40 | 4.952871 | -1.29955 | 0.91119  |
| H | 41 | -1.8515  | 0.505562 | 0.160448 |
| H | 42 | -1.05384 | -0.76792 | 1.054662 |
| H | 43 | -2.09849 | -2.34722 | -0.60248 |
| H | 44 | -1.13036 | -3.08251 | -3.31918 |
| H | 45 | -1.04608 | -3.97694 | -1.8283  |
| H | 46 | 1.005749 | -2.03993 | -2.96235 |
| H | 47 | 1.292608 | -3.48629 | -2.01183 |
| H | 48 | 5.995219 | 1.22375  | 1.25996  |
| H | 49 | 6.16284  | 2.049571 | 2.890808 |
| H | 50 | 4.557761 | 1.656111 | 4.666589 |
| H | 51 | 3.337545 | 0.375986 | 4.575667 |
| H | 52 | 3.022583 | 1.953906 | 3.820581 |
| H | 53 | -0.49349 | 2.078359 | -0.87379 |
| H | 54 | 1.33803  | -3.38996 | 0.414061 |
| H | 55 | 0.325417 | -2.26249 | 1.31799  |
| H | 56 | -0.41331 | -3.42613 | 0.224357 |
| H | 57 | 0.864356 | -0.836   | 2.778676 |
| H | 58 | 1.108419 | 0.464665 | 3.924553 |
| H | 59 | -3.38118 | 0.664736 | 2.596649 |
| H | 60 | -3.21135 | 2.384382 | 3.073211 |
| H | 61 | -3.17405 | 1.088175 | 4.315912 |
| H | 62 | -0.39147 | -0.38088 | -3.19374 |
| H | 63 | 0.606502 | 0.597253 | -2.14561 |
| H | 64 | -2.02306 | 0.833455 | -4.64103 |
| H | 65 | -3.76966 | 0.738555 | -4.38599 |
| H | 66 | -1.7961  | -1.49255 | -4.19859 |
| H | 67 | -3.53364 | -1.5932  | -4.36622 |
| H | 68 | -2.90704 | 3.064673 | -2.87839 |
| H | 69 | -4.41347 | 2.1686   | -2.6668  |
| H | 70 | -2.44234 | 2.809848 | -0.38382 |
| H | 71 | -3.95568 | 1.90251  | -0.22706 |
| H | 72 | -3.9882  | 3.613779 | -0.68691 |
| H | 73 | -3.94692 | -3.23112 | -2.34242 |
| H | 74 | -4.34984 | -2.22588 | -0.93373 |
| H | 75 | -5.00837 | -1.81519 | -2.53122 |



|   |    |          |          |          |
|---|----|----------|----------|----------|
| H | 76 | 0.74759  | 2.190352 | 2.207709 |
| H | 77 | 3.813832 | 2.237583 | 0.13631  |
| H | 78 | 2.189627 | 2.939333 | 0.258262 |
| H | 79 | 3.261328 | 2.926018 | 1.671936 |

Conformer 4, DFT energy -1695.12088 au ( $\omega$ B97X-V/6-311+G(2df,2p))

| Tag | Symbol | X        | Y        | Z        |
|-----|--------|----------|----------|----------|
| C   | 1      | 1.269595 | 0.341991 | 0.081959 |
| C   | 2      | 2.927711 | -1.35268 | -0.34111 |
| C   | 3      | 3.121122 | 0.114106 | 1.742263 |
| C   | 4      | 3.853557 | -0.52519 | 0.546259 |
| C   | 5      | 2.003972 | 1.035568 | 1.197984 |
| C   | 6      | 1.551646 | -0.83601 | -0.49643 |
| C   | 7      | 0.409785 | -1.71174 | -0.97267 |
| C   | 8      | -0.87399 | -0.84259 | -1.19116 |
| C   | 9      | -1.2273  | -0.117   | 0.132352 |
| C   | 10     | -0.09934 | 0.88101  | 0.46118  |
| C   | 11     | -1.87928 | -1.89823 | -1.72573 |
| C   | 12     | -0.99228 | -2.925   | -2.50437 |
| C   | 13     | 0.483844 | -2.4991  | -2.29132 |
| C   | 14     | 4.103369 | 0.764209 | 2.71863  |
| O   | 15     | 3.466338 | 1.416558 | 3.820375 |
| C   | 16     | 4.203241 | 0.222315 | 4.081132 |
| C   | 17     | 5.321453 | 1.486716 | 2.177486 |
| O   | 18     | 3.314374 | -2.37967 | -0.87242 |
| O   | 19     | -0.40634 | 2.176668 | -0.01293 |
| C   | 20     | 0.241134 | -2.77264 | 0.152672 |
| C   | 21     | 0.192014 | 0.037882 | 2.914193 |
| C   | 22     | 0.782678 | 0.251326 | 4.289008 |
| O   | 23     | 0.534306 | 1.482524 | 4.745228 |
| C   | 24     | 1.113429 | 1.798581 | 6.009566 |
| O   | 25     | 1.355158 | -0.60416 | 4.927231 |
| C   | 26     | -0.62332 | 0.206621 | -2.31107 |
| O   | 27     | -1.56879 | 1.270258 | -2.31082 |
| C   | 28     | -2.9193  | 0.988202 | -2.67431 |
| C   | 29     | -3.00088 | 0.504831 | -4.12752 |
| C   | 30     | -2.89601 | -1.02174 | -4.01668 |
| C   | 31     | -3.10517 | -1.33312 | -2.50269 |
| C   | 32     | -3.6755  | 2.268332 | -2.33519 |
| C   | 33     | -5.18961 | 2.165722 | -2.48876 |
| O   | 34     | -3.45844 | -0.06493 | -1.92337 |
| C   | 35     | -4.30392 | -2.25214 | -2.29888 |
| C   | 36     | 0.558443 | 1.090707 | 1.879674 |

|   |    |          |          |          |
|---|----|----------|----------|----------|
| C | 37 | 2.477787 | 2.452946 | 0.859583 |
| H | 38 | 2.630345 | -0.70236 | 2.286027 |
| H | 39 | 4.313414 | 0.252903 | -0.07775 |
| H | 40 | 4.658365 | -1.18881 | 0.875194 |
| H | 41 | -2.17866 | 0.410996 | 0.057804 |
| H | 42 | -1.34681 | -0.86498 | 0.920704 |
| H | 43 | -2.30394 | -2.40114 | -0.84966 |
| H | 44 | -1.24135 | -2.98084 | -3.56628 |
| H | 45 | -1.15504 | -3.9328  | -2.11157 |
| H | 46 | 0.844957 | -1.87142 | -3.11247 |
| H | 47 | 1.165193 | -3.34893 | -2.22312 |
| H | 48 | 3.595986 | -0.62809 | 4.381052 |
| H | 49 | 5.126106 | 0.369557 | 4.642377 |
| H | 50 | 5.840283 | 1.985367 | 3.000676 |
| H | 51 | 5.062393 | 2.243664 | 1.434653 |
| H | 52 | 6.01498  | 0.777984 | 1.713397 |
| H | 53 | -0.90546 | 2.083917 | -0.8444  |
| H | 54 | 1.146298 | -3.38538 | 0.18317  |
| H | 55 | 0.115862 | -2.32072 | 1.137682 |
| H | 56 | -0.60525 | -3.44303 | -0.01509 |
| H | 57 | -0.89919 | 0.049639 | 3.033317 |
| H | 58 | 0.472571 | -0.97074 | 2.603524 |
| H | 59 | 0.794634 | 1.082006 | 6.76978  |
| H | 60 | 0.757707 | 2.800111 | 6.252246 |
| H | 61 | 2.201738 | 1.789216 | 5.926259 |
| H | 62 | -0.59289 | -0.26437 | -3.29703 |
| H | 63 | 0.339233 | 0.702239 | -2.17956 |
| H | 64 | -2.21259 | 0.957124 | -4.73399 |
| H | 65 | -3.96236 | 0.798913 | -4.55479 |
| H | 66 | -1.93718 | -1.37897 | -4.39276 |
| H | 67 | -3.66648 | -1.52108 | -4.61034 |
| H | 68 | -3.42463 | 2.518025 | -1.29811 |
| H | 69 | -3.27146 | 3.071357 | -2.96117 |
| H | 70 | -5.57969 | 1.337249 | -1.89253 |
| H | 71 | -5.48891 | 2.006963 | -3.52996 |
| H | 72 | -5.66588 | 3.090164 | -2.14981 |
| H | 73 | -4.08128 | -3.25566 | -2.67817 |
| H | 74 | -4.54939 | -2.32979 | -1.23534 |
| H | 75 | -5.17918 | -1.86338 | -2.82863 |
| H | 76 | 0.322501 | 2.08562  | 2.263437 |
| H | 77 | 3.310349 | 2.430051 | 0.148185 |
| H | 78 | 1.666409 | 3.02185  | 0.404541 |
| H | 79 | 2.802812 | 2.966444 | 1.769163 |

Conformer 5, DFT energy -1695.12078 au ( $\omega$ B97X-V/6-311+G(2df,2p))

| Tag | Symbol | X        | Y        | Z        |
|-----|--------|----------|----------|----------|
| C   | 1      | 1.56532  | 0.37903  | 0.093545 |
| C   | 2      | 3.196099 | -1.33983 | -0.33956 |
| C   | 3      | 3.374799 | 0.081662 | 1.757757 |
| C   | 4      | 4.134426 | -0.54936 | 0.576494 |
| C   | 5      | 2.330613 | 1.066532 | 1.193225 |
| C   | 6      | 1.820845 | -0.80904 | -0.47386 |
| C   | 7      | 0.6521   | -1.6825  | -0.88708 |
| C   | 8      | -0.63274 | -0.80771 | -1.08423 |
| C   | 9      | -0.93317 | -0.0381  | 0.226587 |
| C   | 10     | 0.217026 | 0.953201 | 0.487625 |
| C   | 11     | -1.66452 | -1.87113 | -1.54778 |
| C   | 12     | -0.81618 | -2.93199 | -2.32327 |
| C   | 13     | 0.669888 | -2.51216 | -2.18072 |
| C   | 14     | 4.288566 | 0.653107 | 2.839462 |
| O   | 15     | 3.569019 | 1.31214  | 3.889926 |
| C   | 16     | 4.206908 | 0.075513 | 4.188659 |
| C   | 17     | 5.582496 | 1.327073 | 2.436723 |
| O   | 18     | 3.57082  | -2.35757 | -0.89447 |
| O   | 19     | -0.05604 | 2.238936 | -0.03742 |
| C   | 20     | 0.513987 | -2.70049 | 0.282085 |
| C   | 21     | 0.56907  | 0.248097 | 3.008608 |
| C   | 22     | -0.8983  | 0.214185 | 3.377752 |
| O   | 23     | -1.51522 | 1.374262 | 3.110265 |
| C   | 24     | -2.92284 | 1.388967 | 3.333754 |
| O   | 25     | -1.46144 | -0.7477  | 3.847236 |
| C   | 26     | -0.41909 | 0.208607 | -2.23898 |
| O   | 27     | -1.36202 | 1.275997 | -2.2287  |
| C   | 28     | -2.726   | 0.992007 | -2.53748 |
| C   | 29     | -2.86306 | 0.470549 | -3.97434 |
| C   | 30     | -2.74966 | -1.05302 | -3.82842 |
| C   | 31     | -2.91224 | -1.32401 | -2.30085 |
| C   | 32     | -3.4943  | 2.273573 | -2.23571 |
| C   | 33     | -3.54552 | 2.634165 | -0.75126 |
| O   | 34     | -3.24777 | -0.0406  | -1.74521 |
| C   | 35     | -4.10471 | -2.23536 | -2.03409 |
| C   | 36     | 0.902192 | 1.208635 | 1.88128  |
| C   | 37     | 2.89325  | 2.445146 | 0.838836 |
| H   | 38     | 2.814942 | -0.73695 | 2.223843 |
| H   | 39     | 4.637704 | 0.222912 | -0.02026 |
| H   | 40     | 4.906635 | -1.24689 | 0.914129 |
| H   | 41     | -1.88166 | 0.495952 | 0.172275 |

|   |    |          |          |          |
|---|----|----------|----------|----------|
| H | 42 | -1.03073 | -0.76276 | 1.039228 |
| H | 43 | -2.06237 | -2.33948 | -0.64072 |
| H | 44 | -1.10614 | -3.02027 | -3.37262 |
| H | 45 | -0.97181 | -3.92441 | -1.89057 |
| H | 46 | 1.002717 | -1.91307 | -3.03457 |
| H | 47 | 1.348115 | -3.36457 | -2.11199 |
| H | 48 | 3.534186 | -0.76059 | 4.380292 |
| H | 49 | 5.06131  | 0.145743 | 4.861361 |
| H | 50 | 6.062626 | 1.75805  | 3.319323 |
| H | 51 | 5.417337 | 2.129737 | 1.714465 |
| H | 52 | 6.269613 | 0.602348 | 1.988149 |
| H | 53 | -0.57423 | 2.128791 | -0.85491 |
| H | 54 | 1.412129 | -3.32446 | 0.300582 |
| H | 55 | 0.428986 | -2.21173 | 1.254336 |
| H | 56 | -0.34582 | -3.36532 | 0.171986 |
| H | 57 | 0.835286 | -0.78762 | 2.781256 |
| H | 58 | 1.150307 | 0.531974 | 3.894417 |
| H | 59 | -3.40859 | 0.611393 | 2.737832 |
| H | 60 | -3.25947 | 2.37643  | 3.017769 |
| H | 61 | -3.14841 | 1.222879 | 4.390445 |
| H | 62 | -0.4246  | -0.28485 | -3.21416 |
| H | 63 | 0.549599 | 0.702828 | -2.15213 |
| H | 64 | -2.10446 | 0.906979 | -4.62826 |
| H | 65 | -3.84537 | 0.753765 | -4.36163 |
| H | 66 | -1.80152 | -1.41798 | -4.22352 |
| H | 67 | -3.53619 | -1.56879 | -4.38578 |
| H | 68 | -3.03224 | 3.081124 | -2.8135  |
| H | 69 | -4.51299 | 2.142493 | -2.61483 |
| H | 70 | -2.54836 | 2.776875 | -0.32717 |
| H | 71 | -4.04482 | 1.84179  | -0.18633 |
| H | 72 | -4.10798 | 3.561978 | -0.60868 |
| H | 73 | -3.89363 | -3.24976 | -2.39007 |
| H | 74 | -4.31737 | -2.28143 | -0.96177 |
| H | 75 | -4.99561 | -1.86182 | -2.54821 |
| H | 76 | 0.703809 | 2.23346  | 2.200731 |
| H | 77 | 3.754417 | 2.365696 | 0.166192 |
| H | 78 | 2.128415 | 3.040691 | 0.337842 |
| H | 79 | 3.203598 | 2.968049 | 1.74887  |

Conformer 6, DFT energy -1695.12039 au ( $\omega$ B97X-V/6-311+G(2df,2p))

| Tag | Symbol | X        | Y        | Z        |
|-----|--------|----------|----------|----------|
| C   | 1      | 1.587053 | 0.367254 | 0.057905 |
| C   | 2      | 3.128807 | -1.45517 | -0.25121 |

|   |    |          |          |          |
|---|----|----------|----------|----------|
| C | 3  | 3.466439 | 0.16247  | 1.684173 |
| C | 4  | 4.130024 | -0.60038 | 0.52187  |
| C | 5  | 2.3982   | 1.107962 | 1.089013 |
| C | 6  | 1.777833 | -0.87163 | -0.4171  |
| C | 7  | 0.566156 | -1.70675 | -0.78032 |
| C | 8  | -0.66851 | -0.77844 | -1.04431 |
| C | 9  | -0.93121 | 0.08925  | 0.213081 |
| C | 10 | 0.272379 | 1.030847 | 0.415631 |
| C | 11 | -1.75258 | -1.81356 | -1.4464  |
| C | 12 | -0.95703 | -2.95959 | -2.15501 |
| C | 13 | 0.549114 | -2.61282 | -2.02198 |
| C | 14 | 4.464736 | 0.84245  | 2.616221 |
| O | 15 | 5.681715 | 0.127458 | 2.834692 |
| C | 16 | 5.748541 | 1.359182 | 2.127503 |
| C | 17 | 3.878967 | 1.428237 | 3.881523 |
| O | 18 | 3.433767 | -2.54926 | -0.69275 |
| O | 19 | 0.063377 | 2.295127 | -0.18357 |
| C | 20 | 0.367383 | -2.6484  | 0.442352 |
| C | 21 | 0.622423 | 0.400649 | 2.93946  |
| C | 22 | -0.82761 | 0.567975 | 3.335267 |
| O | 23 | -1.3936  | -0.61461 | 3.634954 |
| C | 24 | -2.78049 | -0.55363 | 3.968677 |
| O | 25 | -1.41883 | 1.619807 | 3.378536 |
| C | 26 | -0.40047 | 0.148942 | -2.26196 |
| O | 27 | -1.28454 | 1.263633 | -2.32073 |
| C | 28 | -2.6612  | 1.033032 | -2.62007 |
| C | 29 | -2.82207 | 0.42664  | -4.02086 |
| C | 30 | -2.8007  | -1.08804 | -3.77623 |
| C | 31 | -2.972   | -1.24939 | -2.23421 |
| C | 32 | -3.36209 | 2.37072  | -2.41432 |
| C | 33 | -3.38596 | 2.851817 | -0.96443 |
| O | 34 | -3.23827 | 0.083317 | -1.76434 |
| C | 35 | -4.21039 | -2.07684 | -1.90829 |
| C | 36 | 0.982216 | 1.330076 | 1.791308 |
| C | 37 | 2.990425 | 2.437491 | 0.606744 |
| H | 38 | 2.953279 | -0.59411 | 2.294663 |
| H | 39 | 4.581416 | 0.101363 | -0.19268 |
| H | 40 | 4.925268 | -1.25437 | 0.883884 |
| H | 41 | -1.84741 | 0.672007 | 0.121761 |
| H | 42 | -1.06923 | -0.57721 | 1.067798 |
| H | 43 | -2.17164 | -2.20739 | -0.51344 |
| H | 44 | -1.24308 | -3.08939 | -3.20093 |
| H | 45 | -1.17006 | -3.91774 | -1.67224 |
| H | 46 | 0.919896 | -2.08472 | -2.90646 |

|   |    |          |          |          |
|---|----|----------|----------|----------|
| H | 47 | 1.179346 | -3.49451 | -1.89425 |
| H | 48 | 6.015607 | 1.277955 | 1.075341 |
| H | 49 | 6.230523 | 2.178852 | 2.66024  |
| H | 50 | 4.659215 | 1.903782 | 4.480925 |
| H | 51 | 3.427334 | 0.63359  | 4.4856   |
| H | 52 | 3.107717 | 2.173197 | 3.658855 |
| H | 53 | -0.46444 | 2.159549 | -0.99131 |
| H | 54 | 1.255252 | -3.28149 | 0.531156 |
| H | 55 | 0.248492 | -2.10448 | 1.381276 |
| H | 56 | -0.49715 | -3.30898 | 0.333706 |
| H | 57 | 0.81107  | -0.64903 | 2.705599 |
| H | 58 | 1.231314 | 0.644059 | 3.817518 |
| H | 59 | -2.94959 | 0.140795 | 4.795068 |
| H | 60 | -3.0596  | -1.56873 | 4.25197  |
| H | 61 | -3.36137 | -0.22341 | 3.10191  |
| H | 62 | -0.43572 | -0.40622 | -3.20328 |
| H | 63 | 0.593849 | 0.594109 | -2.20598 |
| H | 64 | -2.03563 | 0.77413  | -4.69487 |
| H | 65 | -3.78342 | 0.742653 | -4.43434 |
| H | 66 | -1.87946 | -1.53467 | -4.14963 |
| H | 67 | -3.6203  | -1.58989 | -4.29765 |
| H | 68 | -2.86782 | 3.106036 | -3.05842 |
| H | 69 | -4.3889  | 2.258102 | -2.77789 |
| H | 70 | -2.38182 | 2.987752 | -0.55477 |
| H | 71 | -3.91319 | 2.13245  | -0.3314  |
| H | 72 | -3.90819 | 3.811187 | -0.89556 |
| H | 73 | -4.05527 | -3.12238 | -2.19662 |
| H | 74 | -4.42143 | -2.04036 | -0.8351  |
| H | 75 | -5.08205 | -1.69058 | -2.44529 |
| H | 76 | 0.804962 | 2.367422 | 2.083832 |
| H | 77 | 3.845352 | 2.268807 | -0.05616 |
| H | 78 | 2.2392   | 3.008808 | 0.061711 |
| H | 79 | 3.335681 | 3.037251 | 1.454634 |
